# Supplementary material for: Relay Rh(ii)/Pd(0) dual catalysis: synthesis of α-quaternary β-keto-esters via a [1,2]-sigmatropic rearrangement/allylic alkylation cascade of α-diazo tertiary alcohols
Source: Royal Society of Chemistry journal article supplement (doi:10.1039/c9cc08559a), 2019-12-09

## Supporting Information

### Relay Rh(II)/Pd(0) Dual Catalysis: Synthesis of $\alpha$ -Quaternary $\beta$ -Keto-Esters via [1,2]- Sigmatropic Rearrangement/Allylic Alkylation Cascade of $\alpha$ -Diazo Tertiary Alcohols

Xian-Xu Wang, Xiao-Yan Huang, Sen-Hao Lei, Fang Yang, Jin-Ming Gao, Kegong Ji, Zi-Sheng Chen\*

Shaanxi Key Laboratory of Natural Products & Chemical Biology, College of Chemistry and Pharmacy,  
Northwest A&F University, Yangling 712100, Shaanxi, P. R. China.

E-mail: chenzsh@nwsuaf.edu.cn

#### Table of Contents

|                                                                                                             |     |
|-------------------------------------------------------------------------------------------------------------|-----|
| 1. General remarks -----                                                                                    | S2  |
| 2. General procedure for the synthesis of $\alpha$ -diazo tertiary alcohols <b>1</b> -----                  | S2  |
| 3. General procedure for the synthesis of $\alpha$ -quaternary allylated $\beta$ -ketoesters <b>3</b> ----- | S2  |
| 4. Optimization of the asymmetric relay Rh(II)/Pd(0) dual-catalyzed reaction conditions-----                | S3  |
| 5. Characterization data for all compounds -----                                                            | S7  |
| 6. Reference -----                                                                                          | S16 |
| 7. Copies of $^1\text{H}$ and $^{13}\text{C}$ NMR Spectra for all compounds -----                           | S17 |

## 1. General Remarks

For product purification by flash column chromatography, silica gel (200~300 mesh) and light petroleum ether (bp. 60~90 °C) are used.  $^1\text{H}$  NMR spectra were recorded at 500 MHz in  $\text{CDCl}_3$  and  $^{13}\text{C}$  NMR spectra were recorded at 125 MHz in  $\text{CDCl}_3$  using TMS as internal standard. All products were further characterized by HRMS (high resolution mass spectra). Copies of their  $^1\text{H}$  NMR and  $^{13}\text{C}$  NMR spectra were provided. Toluene was dried over sodium. Commercially available reagents and solvents were used without further purification. The  $\text{Rh}_2(\text{tBuCO}_2)_4$ ,<sup>1</sup> and allyl tert-butyl carbonates **2**<sup>2</sup> were prepared according to the literature procedures.

## 2. General procedure for the synthesis of $\alpha$ -diazo tertiary alcohols **1**<sup>3</sup>.

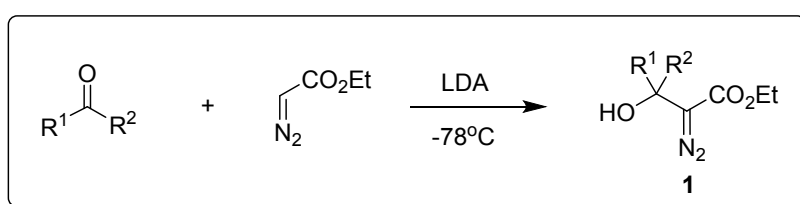

To a stirring solution of LDA [prepared by the addition of  $n\text{-BuLi}$  (3.2 mmol) in hexane to a  $-78^\circ\text{C}$  solution of diisopropylamine (4.0 mmol) in THF (5.0 mL)] was added a cooled ( $-78^\circ\text{C}$ ) solution of  $\alpha$ -diazo ethyl acetate (3.0 mmol) in dry THF (5.0 mL) at  $-78^\circ\text{C}$  in 15 min. After 10 min from the end of the addition, a solution of ketones (2.0 mmol) in THF (10 mL) was then added in 10 min at  $-78^\circ\text{C}$ . After 15 min a cooled ( $-78^\circ\text{C}$ ) solution of AcOH (0.3 mL) in THF (20 mL) was added in 5 min. The reaction mixture was taken into  $\text{H}_2\text{O}$  and extracted with EtOAc. The combined organic extracts were washed with saturated aqueous  $\text{NaHCO}_3$  solution and brine, dried over anhydrous  $\text{Na}_2\text{SO}_4$ , and concentrated under reduced pressure. The crude residue was subjected to flash silica gel chromatography to afford the pure  $\alpha$ -diazo tertiary alcohols **1** by using a mixture of petroleum ether/ethyl acetate as eluent (40:1, v:v).

## 3. General procedure for the synthesis of $\alpha$ -quaternary allylated $\beta$ -ketoesters **3**.

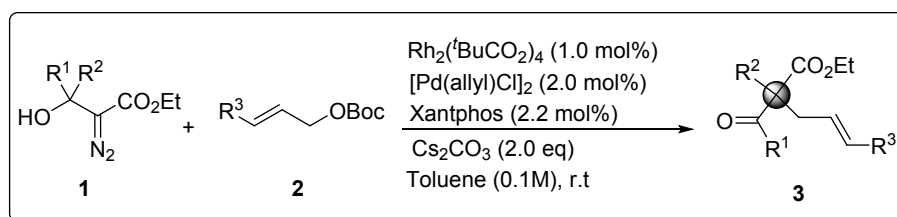

In an oven-dried 10 mL Schlenk flask equipped with a stir bar,  $[\text{PdCl}(\text{allyl})]_2$  (1.5 mg,  $4.0 \times 10^{-3}$  mmol, 2.0 mol %), Xantphos (2.6 mg,  $4.4 \times 10^{-3}$  mmol, 2.2 mol %),  $\text{Rh}_2(\text{tBuCO}_2)_4$  (1.2 mg,  $2.0 \times 10^{-3}$  mmol, 1.0 mol %), and  $\text{Cs}_2\text{CO}_3$  (130.3mg, 0.4 mmol, 2.0 equiv) were stirred in anhydrous toluene (0.5 mL) at room temperature for 5 min under an argon atmosphere. Then, a solution of  $\alpha$ -diazo tertiary alcohols **1** (0.24 mmol, 1.2 equiv) and allyl tert-butyl carbonates **2** (0.20 mmol, 1.0 equiv) in anhydrous toluene (1.5 mL) was introduced by syringe. The mixture was stirred at room temperature.

When the reaction was considered complete (determined by TLC analysis), the product **3** was directly isolated by chromatography on silica-gel.

#### 4. Optimization of the asymmetric relay Rh(II)/Pd(0) dual-catalyzed reaction conditions

In an oven-dried 10 mL Schlenk flask equipped with a stir bar, [PdCl(allyl)]<sub>2</sub> (0.8 mg, 2.0x10<sup>-3</sup> mmol, 2.0 mol %), chiral Ligand (2.2x10<sup>-3</sup> mmol, 2.2 mol %), Rh<sub>2</sub>L<sub>4</sub> (1.0x10<sup>-3</sup> mmol, 1.0 mol %), and Cs<sub>2</sub>CO<sub>3</sub> (65.2mg, 0.2 mmol, 2.0 equiv) were stirred in anhydrous toluene (0.3 mL) at room temperature for 20 min under an argon atmosphere. Then, a solution of α-diazo tertiary alcohols **1a** (0.12 mmol, 1.2 equiv) and allyl tert-butyl carbonate **2a** (0.10 mmol, 1.0 equiv) in anhydrous toluene (0.7 mL) was introduced by syringe. The mixture was stirred at room temperature. As determined by TLC analysis, the product **3aa** was directly isolated by chromatography on silica-gel (eluent: petroleum ether/ethyl acetate = 60:1). The enantiomeric excess was determined by chiral HPLC analysis. (Chiral ND column, flow 0.5 ml/min, n-hexane/i-PrOH = 9/1, 254 nm) t = 7.9 min (major), 8.8 min (minor).

**Table S-1.** Condition screening of asymmetric relay Rh(II)/Pd(0) dual catalysis <sup>a</sup>

Reaction scheme: **1a** (1.2 equiv) + **2a** → **3aa**. Conditions: Rh<sub>2</sub>L<sub>4</sub> (1 mol%), [Pd(allyl)Cl]<sub>2</sub> (2 mol%), Ligand (2.2 mol%), Cs<sub>2</sub>CO<sub>3</sub> (2 eq), Toluene (0.1M), T.

| Entry | Rh <sub>2</sub> L <sub>4</sub>                                  | Ligand   | T(°C) | t(h) | Yield(%) <sup>b</sup> | ee% <sup>c</sup> |
|-------|-----------------------------------------------------------------|----------|-------|------|-----------------------|------------------|
| 1     | Rh <sub>2</sub> [(S)-PTAD] <sub>4</sub>                         | Xantphos | r.t   | 1    | 89                    | 0                |
| 2     | Rh <sub>2</sub> [(S)-DOSP] <sub>4</sub>                         | Xantphos | r.t   | 2    | 84                    | 0                |
| 3     | Rh <sub>2</sub> [(S)-BTPCP] <sub>4</sub>                        | Xantphos | r.t   | 2    | 83                    | 0                |
| 4     | Rh <sub>2</sub> ( <sup>t</sup> BuCO <sub>2</sub> ) <sub>4</sub> | L1       | r.t   | 1    | 72                    | 0                |
| 5     | Rh <sub>2</sub> ( <sup>t</sup> BuCO <sub>2</sub> ) <sub>4</sub> | L2       | r.t   | 1    | 80                    | 0                |
| 6     | Rh <sub>2</sub> ( <sup>t</sup> BuCO <sub>2</sub> ) <sub>4</sub> | L3       | r.t   | 1    | 86                    | 0                |
| 7     | Rh <sub>2</sub> ( <sup>t</sup> BuCO <sub>2</sub> ) <sub>4</sub> | L4       | r.t   | 1    | 79                    | 6                |
| 8     | Rh <sub>2</sub> ( <sup>t</sup> BuCO <sub>2</sub> ) <sub>4</sub> | L5       | r.t   | 8    | 80                    | 0                |
| 9     | Rh <sub>2</sub> ( <sup>t</sup> BuCO <sub>2</sub> ) <sub>4</sub> | L6       | r.t   | 2    | 99                    | 0                |
| 10    | Rh <sub>2</sub> ( <sup>t</sup> BuCO <sub>2</sub> ) <sub>4</sub> | L7       | r.t   | 3    | 35                    | 16               |
| 11    | Rh <sub>2</sub> ( <sup>t</sup> BuCO <sub>2</sub> ) <sub>4</sub> | L8       | r.t   | 2    | 57                    | 39               |
| 12    | Rh <sub>2</sub> ( <sup>t</sup> BuCO <sub>2</sub> ) <sub>4</sub> | L9       | r.t   | 1    | 66                    | 7                |
| 13    | Rh <sub>2</sub> ( <sup>t</sup> BuCO <sub>2</sub> ) <sub>4</sub> | L10      | r.t   | 1    | 79                    | 0                |
| 14    | Rh <sub>2</sub> ( <sup>t</sup> BuCO <sub>2</sub> ) <sub>4</sub> | L11      | r.t   | 1    | 79                    | 0                |

|           |                                                                 |           |            |          |           |           |
|-----------|-----------------------------------------------------------------|-----------|------------|----------|-----------|-----------|
| 15        | Rh <sub>2</sub> ( <sup>t</sup> BuCO <sub>2</sub> ) <sub>4</sub> | L12       | r.t        | 1        | 79        | 6         |
| 16        | Rh <sub>2</sub> ( <sup>t</sup> BuCO <sub>2</sub> ) <sub>4</sub> | L13       | r.t        | 1        | 81        | 0         |
| 17        | Rh <sub>2</sub> ( <sup>t</sup> BuCO <sub>2</sub> ) <sub>4</sub> | L14       | r.t        | 1        | 82        | 0         |
| 18        | Rh <sub>2</sub> ( <sup>t</sup> BuCO <sub>2</sub> ) <sub>4</sub> | L15       | r.t        | 2        | 87        | 0         |
| 19        | Rh <sub>2</sub> ( <sup>t</sup> BuCO <sub>2</sub> ) <sub>4</sub> | L16       | r.t        | 4        | 85        | 0         |
| 20        | Rh <sub>2</sub> ( <sup>t</sup> BuCO <sub>2</sub> ) <sub>4</sub> | L17       | r.t        | 1        | 95        | 19        |
| 21        | Rh <sub>2</sub> ( <sup>t</sup> BuCO <sub>2</sub> ) <sub>4</sub> | L18       | r.t        | 1        | 93        | 23        |
| 22        | Rh <sub>2</sub> ( <sup>t</sup> BuCO <sub>2</sub> ) <sub>4</sub> | L19       | r.t        | 1        | 93        | 0         |
| 23        | Rh <sub>2</sub> ( <sup>t</sup> BuCO <sub>2</sub> ) <sub>4</sub> | L20       | r.t        | 1        | 94        | 29        |
| 24        | Rh <sub>2</sub> ( <sup>t</sup> BuCO <sub>2</sub> ) <sub>4</sub> | L21       | r.t        | 1        | 88        | 6         |
| 25        | Rh <sub>2</sub> ( <sup>t</sup> BuCO <sub>2</sub> ) <sub>4</sub> | L22       | r.t        | 1        | 90        | 0         |
| 26        | Rh <sub>2</sub> ( <sup>t</sup> BuCO <sub>2</sub> ) <sub>4</sub> | L23       | r.t        | 4        | 74        | 0         |
| 27        | Rh <sub>2</sub> ( <sup>t</sup> BuCO <sub>2</sub> ) <sub>4</sub> | L24       | r.t        | 4        | 87        | 7         |
| 28        | Rh <sub>2</sub> ( <sup>t</sup> BuCO <sub>2</sub> ) <sub>4</sub> | L8        | 0          | 4        | 63        | 52        |
| <b>29</b> | <b>Rh<sub>2</sub>(<sup>t</sup>BuCO<sub>2</sub>)<sub>4</sub></b> | <b>L8</b> | <b>-10</b> | <b>8</b> | <b>59</b> | <b>53</b> |
| 30        | Rh <sub>2</sub> ( <sup>t</sup> BuCO <sub>2</sub> ) <sub>4</sub> | L8        | -20        | 8        | 46        | 53        |

<sup>a</sup> Reaction conditions: **1a** (0.12 mmol, 1.2 equiv), **2a** (0.1 mmol, 1.0 equiv), Rh<sub>2</sub>L<sub>4</sub> (1.0 mol %), [Pd(allyl)Cl]<sub>2</sub> (2.0 mol %), and **L** (2.2 mol %) in toluene (1.0 ml); <sup>b</sup> The yields in parentheses are isolated yield; <sup>c</sup> Determined by chiral HPLC analysis.

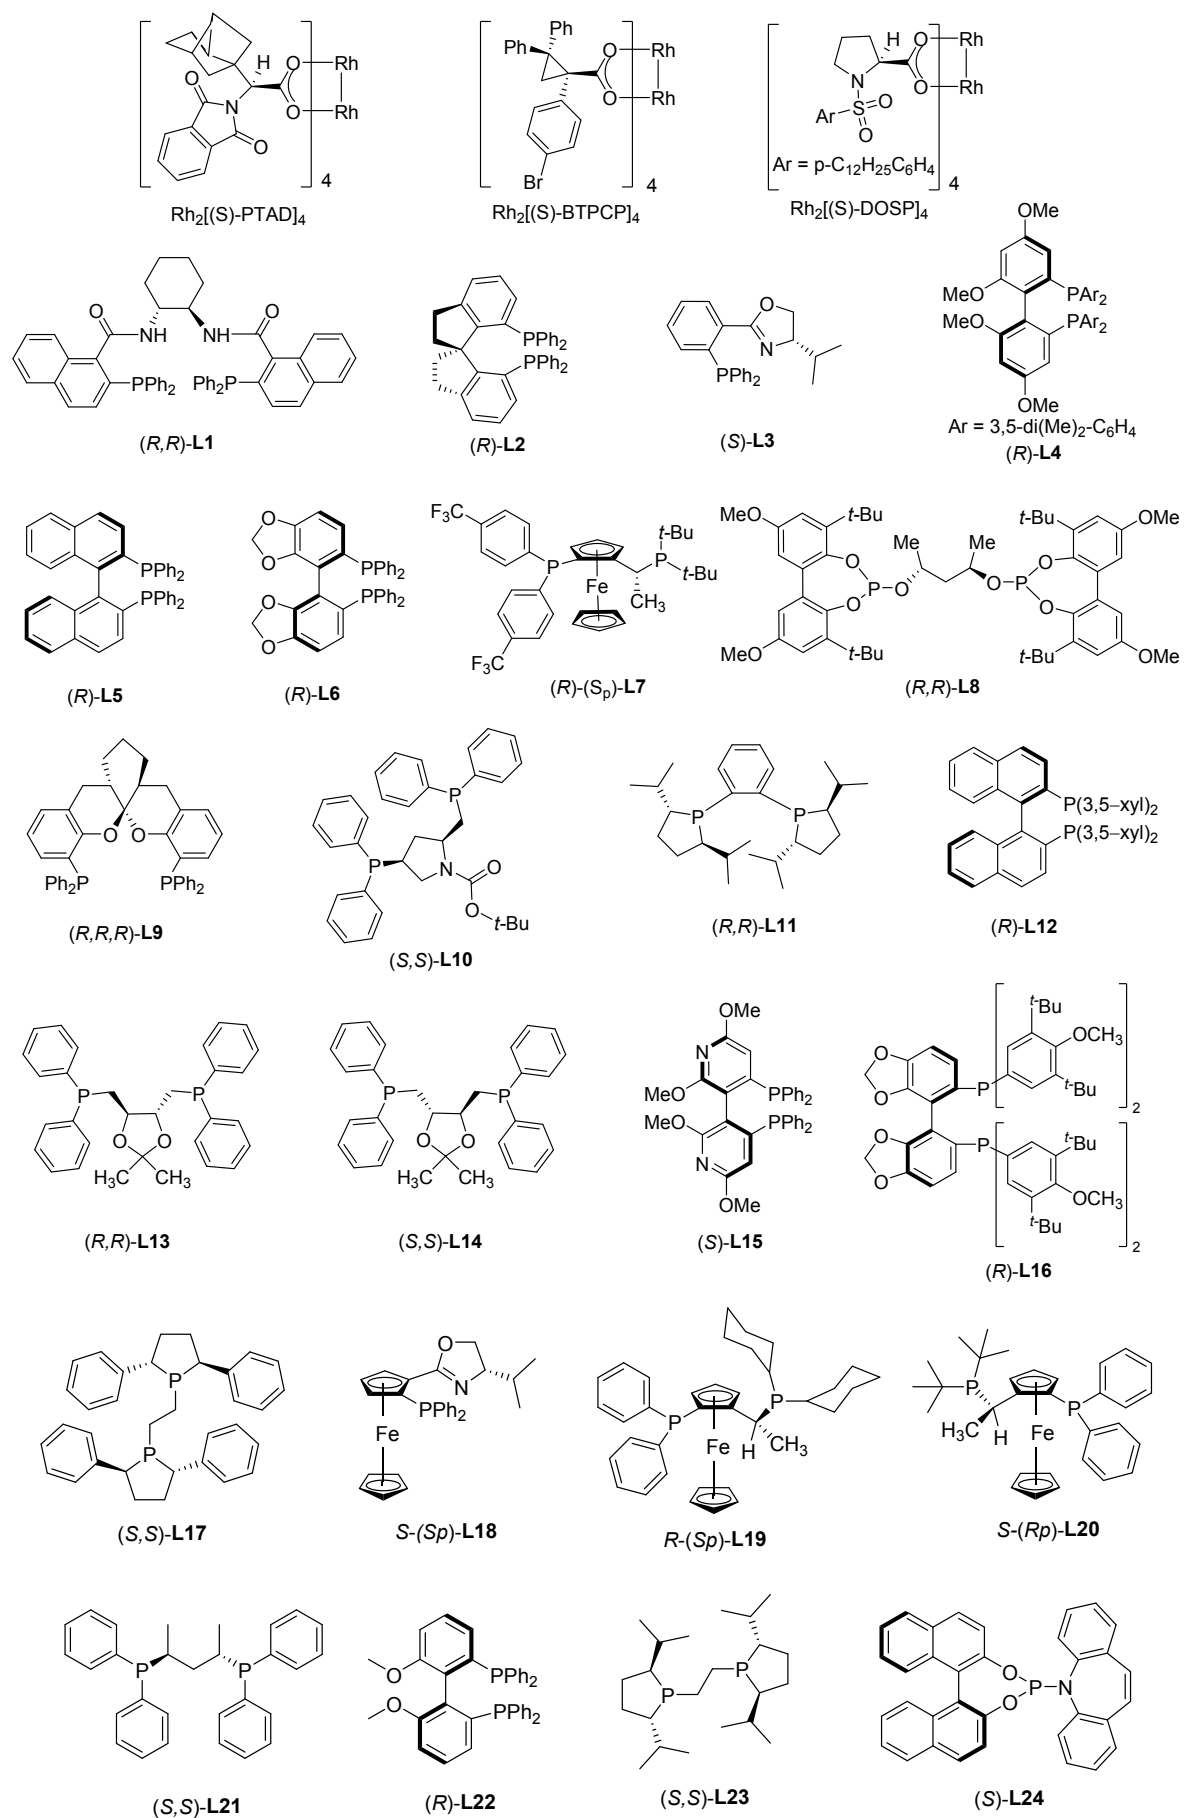

Chiral HPLC chromatograms:

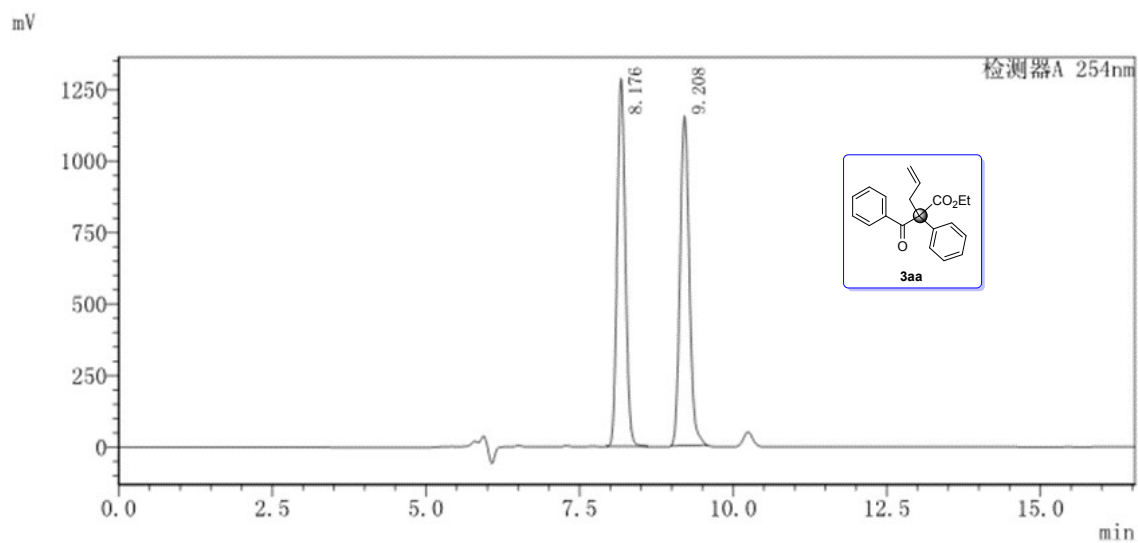

<峰表>

检测器A 254nm

| 峰号 | 保留时间  | 面积       | 高度      | 浓度     | 浓度单位 | 标记 | 化合物名 |
|----|-------|----------|---------|--------|------|----|------|
| 1  | 8.176 | 11875113 | 1286003 | 49.538 |      | M  |      |
| 2  | 9.208 | 12096403 | 1151986 | 50.462 |      | M  |      |
| 总计 |       | 23971515 | 2437989 |        |      |    |      |

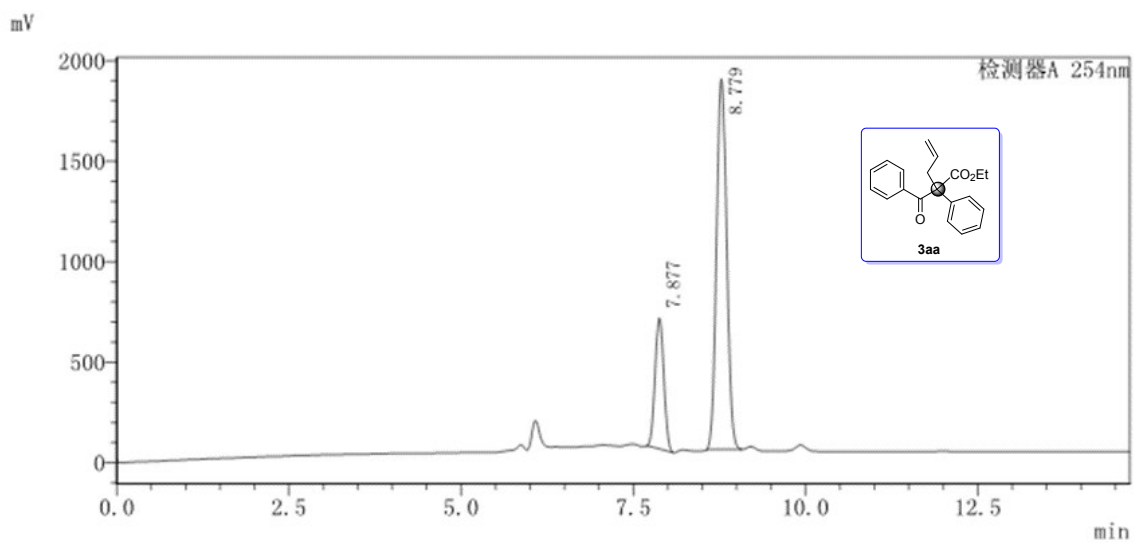

<峰表>

检测器A 254nm

| 峰号 | 保留时间  | 面积       | 高度      | 浓度     | 浓度单位 | 标记 | 化合物名 |
|----|-------|----------|---------|--------|------|----|------|
| 1  | 7.877 | 5757214  | 652527  | 23.336 |      | M  |      |
| 2  | 8.779 | 18913488 | 1843550 | 76.664 |      | M  |      |
| 总计 |       | 24670702 | 2496077 |        |      |    |      |

## 5. Characterization data for all compounds

**Ethyl 2-diazo-3-hydroxy-3,3-diphenylpropanoate 1a<sup>3</sup>.** <sup>1</sup>H NMR (500 MHz, CDCl<sub>3</sub>) δ 7.35-7.33 (m, 4H),

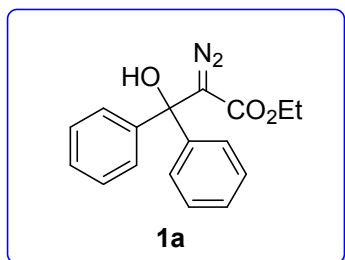

7.28-7.24 (m, 4H), 7.23-7.19 (m, 2H), 4.91 (brs, 1H), 4.16 (q, *J* = 7.1 Hz, 2H), 1.18 (t, *J* = 7.3 Hz, 3H) ppm; <sup>13</sup>C NMR (125 MHz, CDCl<sub>3</sub>) δ 167.3, 143.5, 128.4, 128.2, 126.9, 79.0, 61.3, 14.4 ppm.

**Ethyl 2-diazo-3-hydroxy-3,3-di-p-tolylpropanoate 1b<sup>4</sup>.** <sup>1</sup>H NMR (500 MHz, CDCl<sub>3</sub>) δ 7.22-7.20 (m, 4H),

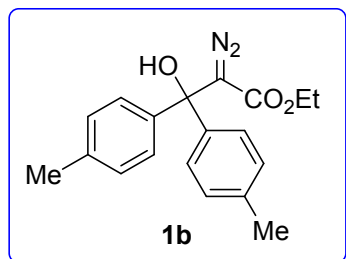

7.06-7.04 (m, 4H), 4.81(brs, 1H), 4.16 (q, *J* = 7.1 Hz, 2H), 2.24 (s, 6H), 1.18 (t, *J* = 7.1 Hz, 3H) ppm; <sup>13</sup>C NMR (125 MHz, CDCl<sub>3</sub>) δ 167.4, 140.8, 137.8, 129.0, 126.7, 78.76, 61.2, 21.1, 14.4 ppm.

**Ethyl 2-diazo-3-hydroxy-3,3-bis(4-methoxyphenyl)propanoate 1c<sup>4</sup>.** <sup>1</sup>H NMR (500 MHz, CDCl<sub>3</sub>) δ 7.25-

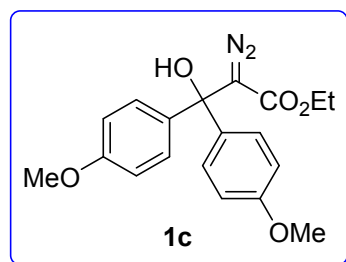

7.22 (m, 4H), 6.80-6.76 (m, 4H), 4.82 (brs, 1H), 4.16 (q, *J* = 7.1 Hz, 2H), 3.17 (s, 6H), 1.18 (t, *J* = 7.1 Hz, 3H) ppm; <sup>13</sup>C NMR (125 MHz, CDCl<sub>3</sub>) δ 167.4, 159.3, 135.9, 128.2, 113.5, 78.4, 61.2, 55.3, 14.4 ppm.

**Ethyl 2-diazo-3,3-bis(4-fluorophenyl)-3-hydroxypropanoate 1d<sup>4</sup>.** <sup>1</sup>H NMR (500 MHz, CDCl<sub>3</sub>) δ 7.39-

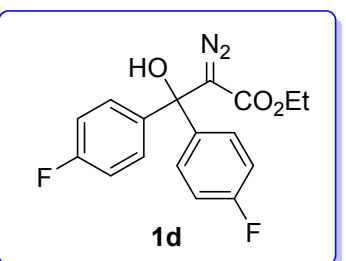

7.36 (m, 4H), 7.04-7.01 (m, 4H), 5.01 (brs, 1H), 4.25 (q, *J* = 7.1 Hz, 2H), 1.27 (t, *J* = 7.1 Hz, 3H) ppm; <sup>13</sup>C NMR (125 MHz, CDCl<sub>3</sub>) δ 167.1, 162.5 (d, *J*<sub>CF</sub> = 246.2 Hz), 139.2 (d, *J*<sub>CF</sub> = 3.1 Hz), 128.7 (d, *J*<sub>CF</sub> = 8.2 Hz), 115.3 (d, *J*<sub>CF</sub> = 21.4 Hz), 78.2, 61.5, 14.4 ppm.

**Ethyl 3,3-bis(4-chlorophenyl)-2-diazo-3-hydroxypropanoate 1e<sup>4</sup>.** <sup>1</sup>H NMR (500 MHz, CDCl<sub>3</sub>) δ 7.35-

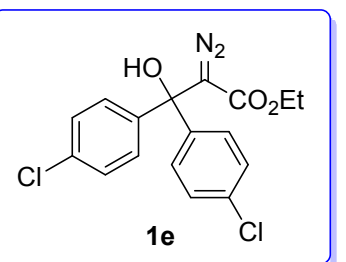

7.30 (m, 8H), 4.99 (brs, 1H), 4.25 (q, *J* = 7.1 Hz, 2H), 1.27 (t, *J* = 7.2 Hz, 3H) ppm; <sup>13</sup>C NMR (125 MHz, CDCl<sub>3</sub>) δ 167.1, 141.7, 134.4, 128.7, 128.2, 78.2, 61.6, 14.4 ppm.

**Ethyl 3, 3-bis(4-bromophenyl)-2-diazo-3-hydroxypropanoate 1f.**  $^1\text{H NMR}$  (500 MHz,  $\text{CDCl}_3$ )  $\delta$  7.41-7.38

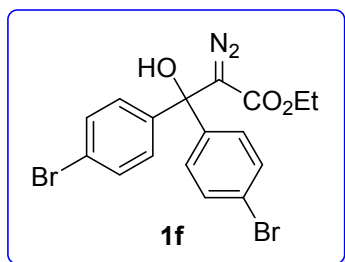

(m, 4H), 7.21-7.19 (m, 4H), 4.91 (brs, 1H), 4.17 (q,  $J = 7.1$  Hz, 2H), 1.20 (t,  $J = 7.2$  Hz, 3H) ppm;  $^{13}\text{C NMR}$  (125 MHz,  $\text{CDCl}_3$ )  $\delta$  167.0, 142.1, 131.7, 128.5, 122.6, 78.3, 61.6, 14.4 ppm.

**Ethyl 2-diazo-2-(9-hydroxy-9H-fluoren-9-yl) acetate 1g<sup>4</sup>.**  $^1\text{H NMR}$  (500 MHz,  $\text{CDCl}_3$ )  $\delta$  7.61 (d,  $J = 7.5$  Hz,

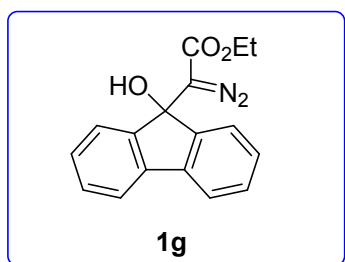

2H), 7.52 (d,  $J = 7.5$  Hz, 2H), 7.30 (t,  $J = 7.5$  Hz, 2H), 7.22 (t,  $J = 7.5$  Hz, 2H), 4.96 (brs, 1H), 4.19 (q,  $J = 7.1$  Hz, 2H), 1.17 (t,  $J = 7.1$  Hz, 3H) ppm;  $^{13}\text{C NMR}$  (125 MHz,  $\text{CDCl}_3$ )  $\delta$  168.1, 146.4, 139.3, 129.9, 128.5, 124.3, 120.3, 78.6, 61.3, 14.4 ppm.

**Ethyl 2-diazo-2-(1-hydroxycyclopentyl) acetate 1h<sup>5</sup>.**  $^1\text{H NMR}$  (500 MHz,  $\text{CDCl}_3$ )  $\delta$  4.25 (q,  $J = 7.1$  Hz, 2H),

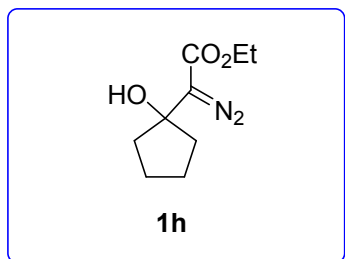

3.28 (brs, 1H), 2.09-2.04 (m, 2H), 1.95-1.86 (m, 2H), 1.83-1.77 (m, 2H), 1.75-1.67 (m, 2H), 1.29 (t,  $J = 7.1$  Hz, 3H) ppm;  $^{13}\text{C NMR}$  (125 MHz,  $\text{CDCl}_3$ )  $\delta$  167.3, 78.6, 60.8, 39.4, 23.0, 14.4 ppm.

**Ethyl 2-diazo-2-(1-hydroxycyclohexyl) acetate 1i<sup>5-6</sup>.**  $^1\text{H NMR}$  (500 MHz,  $\text{CDCl}_3$ )  $\delta$  4.24 (q,  $J = 7.2$  Hz, 2H),

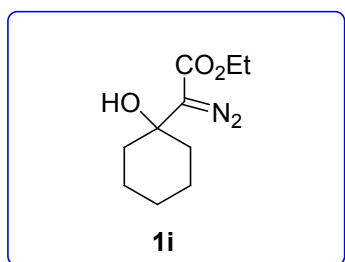

3.49 (brs, 1H), 1.92-1.87 (m, 2H), 1.78-1.69 (m, 4H), 1.57-1.52 (m, 1H), 1.49-1.41 (m, 2H), 1.37-1.32 (m, 1H), 1.29 (t,  $J = 7.1$  Hz, 3H) ppm;  $^{13}\text{C NMR}$  (125 MHz,  $\text{CDCl}_3$ )  $\delta$  167.2, 70.2, 60.7, 36.4, 25.3, 22.0, 14.4 ppm.

**Ethyl 2-diazo-2-(1-hydroxycycloheptyl) acetate 1j<sup>7</sup>.**  $^1\text{H NMR}$  (500 MHz,  $\text{CDCl}_3$ )  $\delta$  4.24 (q,  $J = 7.1$  Hz, 2H),

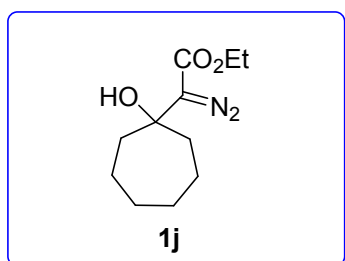

3.75 (brs, 1H), 2.06-2.02 (m, 2H), 1.93-1.88 (m, 2H), 1.75-1.62 (m, 4H), 1.58-1.51 (m, 2H), 1.45-1.39 (m, 2H), 1.29 (t,  $J = 7.1$  Hz, 3H) ppm;  $^{13}\text{C NMR}$  (125 MHz,  $\text{CDCl}_3$ )  $\delta$  167.6, 74.0, 60.8, 40.2, 29.1, 21.9, 14.4 ppm.



**Ethyl 3-(4-chlorophenyl)-2-diazo-3-hydroxy-3-(4-methoxyphenyl) propanoate 1k.**  $^1\text{H NMR}$  (500 MHz,

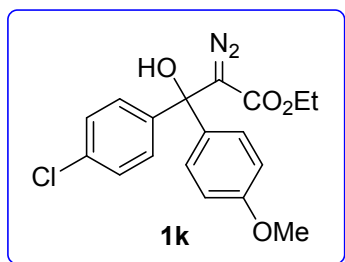

$\text{CDCl}_3$ )  $\delta$  7.38-7.36 (m, 2H), 7.32-7.26 (m, 4H), 6.86-6.84 (m, 2H), 4.94 (brs, 1H), 4.24 (q,  $J = 7.1$  Hz, 2H), 3.78 (s, 3H), 1.27 (t,  $J = 7.1$  Hz, 3H) ppm;  $^{13}\text{C NMR}$  (125 MHz,  $\text{CDCl}_3$ )  $\delta$  167.2, 159.5, 142.7, 134.9, 134.0, 128.5, 128.3, 128.1, 113.8, 78.3, 61.4, 55.3, 14.4 ppm; **HRMS** (ESI)  $m/z$  calcd for  $\text{C}_{18}\text{H}_{17}\text{ClN}_2\text{O}_4\text{Na}^+$  [ $\text{M}+\text{Na}^+$ ]: 383.0769, found 383.0767.

**Ethyl 2-diazo-2-(1-hydroxy-1, 2, 3, 4-tetrahydronaphthalen-1-yl) acetate 1l.**  $^1\text{H NMR}$  (500 MHz,  $\text{CDCl}_3$ )  $\delta$

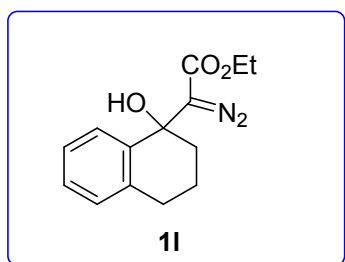

7.67-7.65 (m, 1H), 7.25-7.20 (m, 2H), 7.11-7.09 (m, 1H), 4.36 (brs, 1H), 4.31-4.20 (m, 2H), 2.87-2.75 (m, 2H), 2.53-2.48 (m, 1H), 2.10-2.04 (m, 1H), 2.02-1.95 (m, 1H), 1.82-1.73 (m, 1H), 1.28 (t,  $J = 7.1$  Hz, 3H) ppm;  $^{13}\text{C NMR}$  (125 MHz,  $\text{CDCl}_3$ )  $\delta$  167.1, 137.4, 136.6, 129.1, 128.5, 127.5, 126.7, 72.7, 61.0, 37.7, 29.1, 20.3, 14.4 ppm.

**Ethyl 2-benzoyl-2-phenylpent-4-enoate 3aa.**  $^1\text{H NMR}$  (500 MHz,  $\text{CDCl}_3$ )  $\delta$  7.71 (d,  $J = 7.0$  Hz, 2H),

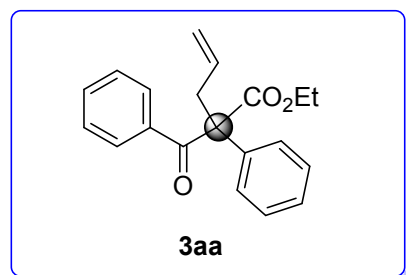

7.62 (d,  $J = 7.3$  Hz, 2H), 7.39 (t,  $J = 7.4$  Hz, 1H), 7.31 (t,  $J = 7.7$  Hz, 2H), 7.27-7.23 (m, 3H), 5.74-5.66 (m, 1H), 5.00 (d,  $J = 10.3$  Hz, 1H), 4.95 (d,  $J = 17.0$  Hz, 1H), 4.11-4.02 (m, 2H), 3.14 (dd,  $J = 14.0, 7.8$  Hz, 1H), 2.94 (dd,  $J = 14.0, 7.0$  Hz, 1H), 0.96 (t,  $J = 7.1$  Hz, 3H) ppm;  $^{13}\text{C NMR}$  (125 MHz,  $\text{CDCl}_3$ )  $\delta$  195.1, 170.8, 138.0, 135.9, 133.1, 132.4, 129.5, 128.5, 128.2, 127.9,

127.4, 118.7, 65.4, 61.2, 44.2, 13.7 ppm; **HRMS** (ESI)  $m/z$  calcd for  $\text{C}_{20}\text{H}_{21}\text{O}_3^+$  [ $\text{M}+\text{H}^+$ ]: 309.1485, found 309.1489.

**Ethyl 2-(4-methylbenzoyl)-2-(p-tolyl)pent-4-enoate 3ba.**  $^1\text{H NMR}$  (500 MHz,  $\text{CDCl}_3$ )  $\delta$  7.56-7.54

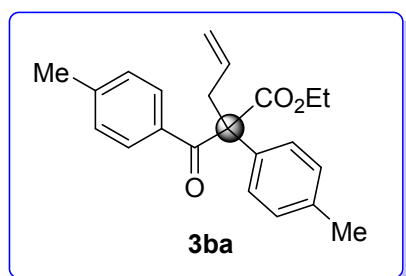

(m, 2H), 7.42-7.39 (m, 2H), 7.03-6.97 (m, 4H), 5.65-5.58 (m, 1H), 4.92-4.85 (m, 2H), 3.99-3.98 (m, 2H), 3.04 (dd,  $J = 13.4, 6.0$  Hz, 1H), 2.83 (dd,  $J = 14.0, 6.8$  Hz, 1H), 2.21 (s, 6H), 0.92 (t,  $J = 7.5$  Hz, 3H) ppm;  $^{13}\text{C NMR}$  (125 MHz,  $\text{CDCl}_3$ )  $\delta$  194.8, 171.0, 143.1, 136.9, 135.2, 133.3, 129.7, 129.1, 128.8, 127.8, 118.4, 65.1, 61.1, 44.2, 21.5, 21.0, 13.8 ppm; **HRMS** (ESI)  $m/z$

calcd for  $\text{C}_{22}\text{H}_{25}\text{O}_3^+$  [ $\text{M}+\text{H}^+$ ]: 337.1798, found 337.1800.

**Ethyl 2-(4-methoxybenzoyl)-2-(4-methoxyphenyl)pent-4-enoate 3ca.**  $^1\text{H NMR}$  (500 MHz,  $\text{CDCl}_3$ )

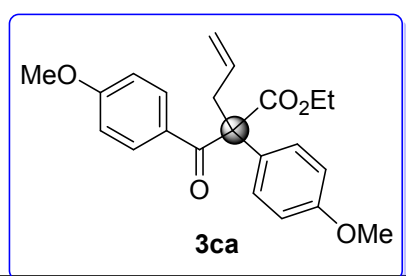

$\delta$  7.73-7.70 (m, 2H), 7.53-7.50 (m, 2H), 6.85-6.82 (m, 2H), 6.75-6.73 (m, 2H), 5.72-5.64 (m, 1H), 5.00-4.97 (m, 1H), 4.95-4.91 (m, 1H), 4.08 (q,  $J = 7.2$  Hz, 2H), 3.77 (d,  $J = 1.8$  Hz, 6H), 3.10 (dd,  $J = 14.0, 7.8$  Hz, 1H), 2.90 (dd,  $J = 14.0, 6.9$  Hz, 1H), 1.01

(t,  $J = 7.1$  Hz, 3H) ppm;  $^{13}\text{C}$  NMR (125 MHz,  $\text{CDCl}_3$ )  $\delta$  193.8, 171.2, 162.8, 158.5, 133.3, 131.9, 130.4, 129.2, 128.7, 118.4, 113.7, 113.3, 64.7, 61.1, 55.3, 55.1, 44.2, 13.8 ppm; HRMS (ESI)  $m/z$  calcd for  $\text{C}_{22}\text{H}_{25}\text{O}_5^+$  [ $\text{M}+\text{H}^+$ ]: 369.1697, found 369.1699.

**Ethyl 2-(4-fluorobenzoyl)-2-(4-fluorophenyl)pent-4-enoate 3da.**  $^1\text{H}$  NMR (500 MHz,  $\text{CDCl}_3$ )  $\delta$

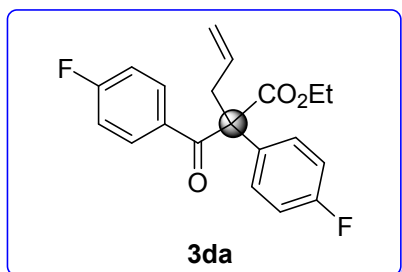

7.64 (d,  $J = 7.6$  Hz, 2H), 7.53 (d,  $J = 7.6$  Hz, 2H), 7.30-7.25 (m, 4H), 5.68-5.59 (m, 1H), 5.02 (d,  $J = 10.2$  Hz, 1H), 4.94 (d,  $J = 17.0$  Hz, 1H), 4.11-4.07 (m, 2H), 3.11 (dd,  $J = 14.1, 7.6$  Hz, 1H), 2.86 (dd,  $J = 14.1, 7.1$  Hz, 1H), 1.02 (t,  $J = 6.7$  Hz, 3H) ppm;  $^{13}\text{C}$  NMR (125 MHz,  $\text{CDCl}_3$ )  $\delta$  193.4, 170.3, 139.2, 136.2, 133.7, 133.6, 132.3, 130.9, 129.3, 128.8, 128.6, 119.3, 64.8, 61.6, 44.1,

13.8 ppm. HRMS (ESI)  $m/z$  calcd for  $\text{C}_{20}\text{H}_{19}\text{F}_2\text{O}_3^+$  [ $\text{M}+\text{H}^+$ ] 345.1297, found 345.1297.

**Ethyl 2-(4-chlorobenzoyl)-2-(4-chlorophenyl)pent-4-enoate 3ea.**  $^1\text{H}$  NMR (500 MHz,  $\text{CDCl}_3$ )  $\delta$

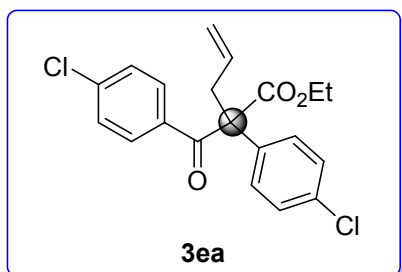

7.65-7.62 (m, 2H), 7.54-7.51 (m, 2H), 7.31-7.24 (m, 4H), 5.68-5.59 (m, 1H), 5.03-5.01 (m, 1H), 4.96-4.92 (m, 1H), 4.13-4.04 (m, 2H), 3.11 (dd,  $J = 14.0, 7.6$  Hz, 1H), 2.86 (dd,  $J = 14.0, 7.1$  Hz, 1H), 1.02 (t,  $J = 7.1$  Hz, 3H) ppm;  $^{13}\text{C}$  NMR (125 MHz,  $\text{CDCl}_3$ )  $\delta$  193.4, 170.3, 139.2, 136.2, 133.8, 133.6, 132.4, 130.9, 129.3, 128.8, 128.6, 119.3, 64.9, 61.6, 44.1, 13.8 ppm; HRMS

(ESI)  $m/z$  calcd for  $\text{C}_{20}\text{H}_{19}\text{Cl}_2\text{O}_3^+$  [ $\text{M}+\text{H}^+$ ]: 377.0706, found 377.0708.

**Ethyl 2-(4-bromobenzoyl)-2-(4-bromophenyl)pent-4-enoate 3fa.**  $^1\text{H}$  NMR (500 MHz,  $\text{CDCl}_3$ )  $\delta$

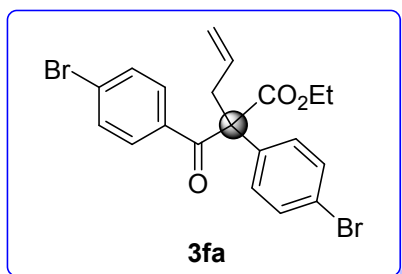

7.57-7.54 (m, 2H), 7.47-7.41 (m, 6H), 5.67-5.59 (m, 1H), 5.03-5.01 (m, 1H), 4.96-4.92 (m, 1H), 4.13-4.04 (m, 2H), 3.10 (dd,  $J = 14.0, 7.6$  Hz, 1H), 2.85 (dd,  $J = 14.0, 7.1$  Hz, 1H), 1.02 (t,  $J = 7.1$  Hz, 3H) ppm;  $^{13}\text{C}$  NMR (125 MHz,  $\text{CDCl}_3$ )  $\delta$  193.5, 170.3, 136.7, 134.1, 132.3, 131.7, 131.6, 131.0, 129.6, 128.0, 121.9, 119.3, 64.9, 61.6, 44.0, 13.8 ppm; HRMS (ESI)  $m/z$  calcd for

$\text{C}_{20}\text{H}_{19}\text{Br}_2\text{O}_3^+$  [ $\text{M}+\text{H}^+$ ]: 464.9696, found 464.9691.

**Ethyl 9-allyl-10-oxo-9,10-dihydrophenanthrene-9-carboxylate 3ga.**  $^1\text{H}$  NMR (500 MHz,  $\text{CDCl}_3$ )  $\delta$

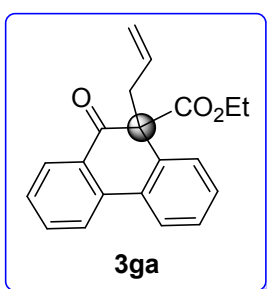

8.13 (dd,  $J = 7.9, 1.5$  Hz, 1H), 8.07-8.05 (m, 2H), 7.71-7.68 (m, 1H), 7.45-7.36 (m, 3H), 7.29-7.26 (m, 1H), 5.36-5.28 (m, 1H), 4.80 (dd,  $J = 16.7, 1.7$  Hz, 1H), 4.73 (dd,  $J = 10.1, 1.8$  Hz, 1H), 4.18-4.07 (m, 2H), 3.17 (dd,  $J = 13.9, 7.5$  Hz, 1H), 2.95 (dd,  $J = 14.0, 7.3$  Hz, 1H), 1.08 (t,  $J = 7.1$  Hz, 3H) ppm;  $^{13}\text{C}$  NMR (125 MHz,  $\text{CDCl}_3$ )  $\delta$  196.1, 171.1, 137.3, 136.7, 134.9, 131.5, 129.8, 129.2, 129.1, 128.4, 128.1, 127.8, 127.7, 123.7, 123.2, 119.0, 62.8, 61.7, 44.4, 13.8 ppm; HRMS (ESI)  $m/z$  calcd for  $\text{C}_{20}\text{H}_{19}\text{O}_3^+$  [ $\text{M}+\text{H}^+$ ]:

307.1329, found 307.1330.

**Ethyl 1-allyl-2-oxocyclohexane-1-carboxylate 3ha.**  $^1\text{H NMR}$  (500 MHz,  $\text{CDCl}_3$ )  $\delta$  5.79-5.70 (m, 1H), 5.05-5.04 (m, 1H), 5.03-5.02 (m, 1H), 4.19 (q,  $J = 7.1$  Hz, 2H), 2.61 (dd,  $J = 14.0, 7.1$  Hz, 1H), 2.50 (q,  $J = 3.3$  Hz, 1H), 2.47-2.44 (m, 2H), 2.34 (dd,  $J = 14.0, 7.9$  Hz, 1H), 2.04-1.98 (m, 1H), 1.78-1.75 (m, 1H), 1.74-1.59 (m, 2H), 1.50-1.44 (m, 1H), 1.25 (t,  $J = 7.1$  Hz, 3H) ppm;  $^{13}\text{C NMR}$  (125 MHz,  $\text{CDCl}_3$ )  $\delta$  207.5, 171.5, 133.3, 118.2, 61.2, 60.9, 41.1, 39.3, 35.8, 27.5, 22.5, 14.2 ppm; **HRMS** (ESI)  $m/z$  calcd for  $\text{C}_{12}\text{H}_{19}\text{O}_3^+$   $[\text{M}+\text{H}^+]$ : 211.1329, found 211.1330.

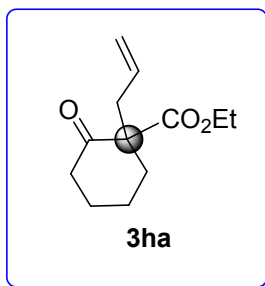

**Ethyl 1-allyl-2-oxocycloheptane-1-carboxylate 3ia.**  $^1\text{H NMR}$  (500 MHz,  $\text{CDCl}_3$ )  $\delta$  5.77-5.69 (m, 1H), 5.08-5.05 (m, 2H), 4.17 (q,  $J = 7.2$  Hz, 2H), 2.74 (dd,  $J = 13.7, 6.3$  Hz, 1H), 2.68-2.63 (m, 1H), 2.48-2.43 (m, 1H), 2.34 (dd,  $J = 13.6, 7.7$  Hz, 1H), 2.13-2.09 (m, 1H), 1.82-1.74 (m, 2H), 1.73-1.68 (m, 1H), 1.65-1.63 (m, 1H), 1.62-1.57 (m, 2H), 1.46-1.38 (m, 1H), 1.25 (t,  $J = 7.0$  Hz, 3H) ppm;  $^{13}\text{C NMR}$  (125 MHz,  $\text{CDCl}_3$ )  $\delta$  209.1, 172.0, 133.6, 118.6, 62.8, 61.2, 42.1, 39.7, 32.1, 29.9, 25.5, 24.6, 14.1 ppm; **HRMS** (ESI)  $m/z$  calcd for  $\text{C}_{13}\text{H}_{21}\text{O}_3^+$   $[\text{M}+\text{H}^+]$ : 225.1485, found 225.1487.

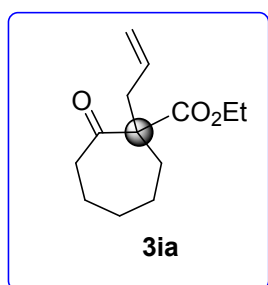

**Ethyl 1-allyl-2-oxocyclooctane-1-carboxylate 3ja.**  $^1\text{H NMR}$  (500 MHz,  $\text{CDCl}_3$ )  $\delta$  5.75-5.67 (m, 1H), 5.10-5.04 (m, 2H), 4.15 (q,  $J = 7.2$  Hz, 2H), 2.84 (dd,  $J = 14.3, 7.1$  Hz, 1H), 2.72 (td,  $J = 12.1, 3.6$  Hz, 1H), 2.51-2.45 (m, 1H), 2.35 (dd,  $J = 14.5, 8.5$  Hz, 1H), 2.29-2.24 (m, 1H), 2.03-1.98 (m, 1H), 1.89-1.82 (m, 1H), 1.80-1.70 (m, 2H), 1.68-1.56 (m, 2H), 1.54-1.45 (m, 1H), 1.39-1.31 (m, 1H), 1.23 (t,  $J = 7.1$  Hz, 3H), 1.04-0.96 (m, 1H) ppm;  $^{13}\text{C NMR}$  (125 MHz,  $\text{CDCl}_3$ )  $\delta$  212.0, 171.3, 133.7, 118.2, 62.5, 61.3, 38.6, 35.5, 29.2, 28.3, 25.6, 24.3, 23.0, 14.1 ppm; **HRMS** (ESI)  $m/z$  calcd for  $\text{C}_{14}\text{H}_{23}\text{O}_3^+$   $[\text{M}+\text{H}^+]$ : 239.1642, found 239.1645.

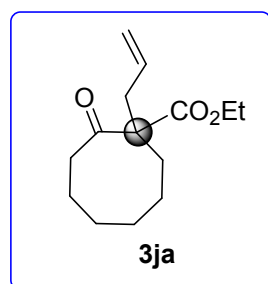

**Ethyl 2-(4-chlorobenzoyl)-2-(4-methoxyphenyl)pent-4-enoate 3l.**  $^1\text{H NMR}$  (500 MHz,  $\text{CDCl}_3$ )  $\delta$  7.667.64 (m, 2H), 7.51-7.48 (m, 2H), 7.25-7.22 (m, 2H), 6.86-6.83 (m, 2H), 5.72-5.63 (m, 1H), 5.01-4.99 (m, 1H), 4.97-4.93 (m, 1H), 4.11-4.05 (m, 2H), 3.78 (s, 3H), 3.09 (dd,  $J = 14.1, 7.7$  Hz, 1H), 2.89 (dd,  $J = 14.0, 6.9$  Hz, 1H), 1.02 (t,  $J = 7.2$  Hz, 3H) ppm;  $^{13}\text{C NMR}$  (125 MHz,  $\text{CDCl}_3$ )  $\delta$  194.0, 170.7, 158.7, 138.8, 134.2, 133.0, 131.0, 129.6, 129.1, 128.5, 118.7, 113.9, 64.9, 61.3, 55.2, 44.1, 13.8 ppm; **HRMS** (ESI)  $m/z$  calcd for  $\text{C}_{21}\text{H}_{22}\text{ClO}_4^+$   $[\text{M}+\text{H}^+]$ : 373.1201, found 373.1203.

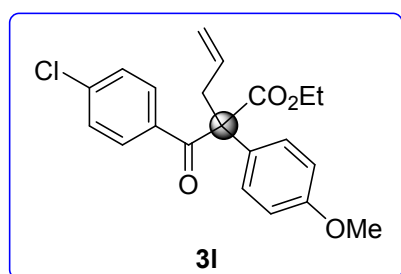

**Ethyl 2-(4-chlorophenyl)-2-(4-methoxybenzoyl)pent-4-enoate 3l'**.  $^1\text{H NMR}$  (500 MHz,  $\text{CDCl}_3$ )  $\delta$

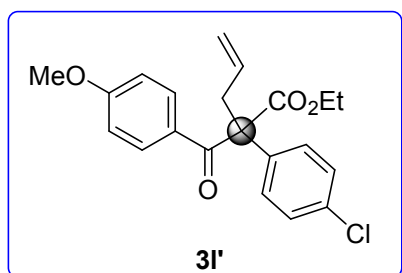

7.71-7.68 (m, 2H), 7.56-7.54 (m, 2H), 7.29-7.27 (m, 2H), 6.77-6.74 (m, 2H), 5.68-5.59 (m, 1H), 5.01-4.99 (m, 1H), 4.95-4.91 (m, 1H), 4.11-4.06 (m, 2H), 3.79 (s, 3H), 3.12 (dd,  $J = 14.0, 7.6$  Hz, 1H), 2.86 (dd,  $J = 14.0, 6.9$  Hz, 1H), 1.01 (t,  $J = 7.1$  Hz, 3H) ppm;  $^{13}\text{C NMR}$  (125 MHz,  $\text{CDCl}_3$ )  $\delta$  193.1, 170.8, 163.0, 136.9, 133.2, 132.7, 131.9, 129.5, 128.5, 128.2, 119.0, 113.5, 64.7,

61.4, 55.4, 44.1, 13.8 ppm; **HRMS** (ESI)  $m/z$  calcd for  $\text{C}_{21}\text{H}_{22}\text{ClO}_4^+$   $[\text{M}+\text{H}]^+$  373.1201, found 373.1200.

**Ethyl 6-allyl-5-oxo-6, 7, 8, 9-tetrahydro-5H-benzo [7] annulene-6-carboxylate 3m**.  $^1\text{H NMR}$  (500

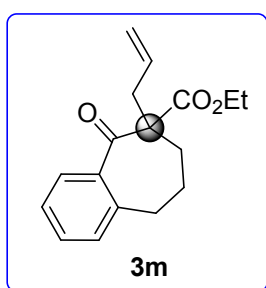

MHz,  $\text{CDCl}_3$ )  $\delta$  7.43 (dd,  $J = 7.6, 1.5$  Hz, 1H), 7.34 (td,  $J = 7.5, 1.6$  Hz, 1H), 7.26-7.23 (m, 1H), 7.11 (dd,  $J = 7.7, 1.1$  Hz, 1H), 5.76-5.67 (m, 1H), 5.11-5.05 (m, 2H), 4.07-3.97 (m, 2H), 3.03-2.97 (m, 1H), 2.82-2.77 (m, 1H), 2.75-2.65 (m, 2H), 2.42-2.37 (m, 1H), 2.10-2.02 (m, 1H), 1.88-1.75 (m, 2H), 1.04 (t,  $J = 7.1$  Hz, 3H) ppm;  $^{13}\text{C NMR}$  (125 MHz,  $\text{CDCl}_3$ )  $\delta$  204.4, 171.8, 140.3, 138.9, 133.0, 131.0, 129.2, 129.0, 126.3, 118.8, 62.0, 61.1, 41.5, 33.3, 32.5, 24.1, 13.8 ppm; **HRMS** (ESI)  $m/z$  calcd for  $\text{C}_{17}\text{H}_{21}\text{O}_3^+$   $[\text{M}+\text{H}]^+$ : 273.1485, found 273.1488.

$\text{C}_{17}\text{H}_{21}\text{O}_3^+$   $[\text{M}+\text{H}]^+$ : 273.1485, found 273.1488.

**Ethyl 5-allyl-6-oxo-6, 7, 8, 9-tetrahydro-5H-benzo [7] annulene-5-carboxylate 3m'**.  $^1\text{H NMR}$

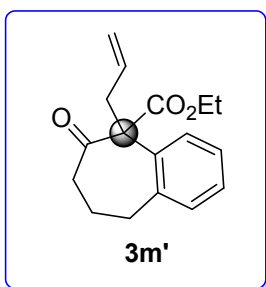

(500 MHz,  $\text{CDCl}_3$ )  $\delta$  7.25-7.24 (m, 2H), 7.19-7.15 (m, 2H), 5.71-5.63 (m, 1H), 4.93-4.90 (m, 2H), 4.23-4.12 (m, 2H), 3.04 (dd,  $J = 14.2, 6.8$  Hz, 1H), 2.96-2.92 (m, 2H), 2.92-2.88 (m, 1H), 2.78-2.72 (m, 1H), 2.52-2.47 (m, 1H), 2.10-1.98 (m, 2H), 1.20 (t,  $J = 7.1$  Hz, 3H) ppm;  $^{13}\text{C NMR}$  (125 MHz,  $\text{CDCl}_3$ )  $\delta$  209.4, 170.6, 139.1, 136.6, 133.6, 130.6, 128.1, 128.0, 126.9, 118.4, 69.8, 61.8, 39.2, 38.8, 31.8, 26.6, 13.9 ppm; **HRMS** (ESI)  $m/z$  calcd for  $\text{C}_{17}\text{H}_{21}\text{O}_3^+$   $[\text{M}+\text{H}]^+$ : 273.1485, found 273.1487.

**Ethyl (E)-2-benzoyl-2,5-diphenylpent-4-enoate 3ab**.  $^1\text{H NMR}$  (500 MHz,  $\text{CDCl}_3$ )  $\delta$  7.73-7.71 (m,

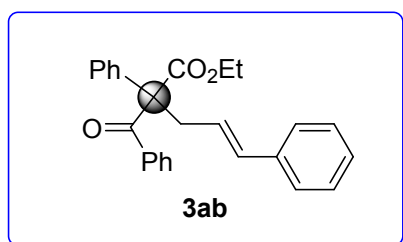

2H), 7.64-7.62 (m, 2H), 7.41-7.38 (m, 1H), 7.34-7.31 (m, 2H), 7.28-7.23 (m, 7H), 7.19-7.16 (m, 1H), 6.25 (d,  $J = 15.8$  Hz, 1H), 6.13-6.07 (m, 1H), 4.10-4.01 (m, 2H), 3.31 (dd,  $J = 14.0, 7.5$  Hz, 1H), 3.03 (dd,  $J = 13.9, 7.4$  Hz, 1H), 0.95 (t,  $J = 7.1$  Hz, 3H) ppm;  $^{13}\text{C NMR}$  (125 MHz,  $\text{CDCl}_3$ )  $\delta$  195.2, 170.8, 138.1, 137.4, 135.9, 133.6, 132.4, 129.5, 128.5, 128.4, 128.1, 127.9, 127.4,

127.2, 126.2, 124.9, 66.0, 61.3, 43.6, 13.7 ppm; **HRMS** (ESI)  $m/z$  calcd for  $\text{C}_{26}\text{H}_{25}\text{O}_3^+$   $[\text{M}+\text{H}]^+$ : 385.1799, found 385.1803.

**Ethyl (*E*)-2-benzoyl-2-phenyl-5-(*p*-tolyl)pent-4-enoate 3ac.**  $^1\text{H NMR}$  (500 MHz,  $\text{CDCl}_3$ )  $\delta$  7.71 (d,

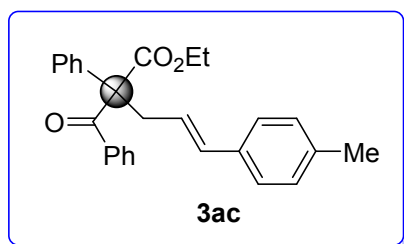

$J = 7.8$  Hz, 2H), 7.63-7.61 (m, 2H), 7.38 (t,  $J = 7.4$  Hz, 1H), 7.31 (t,  $J = 7.7$  Hz, 2H), 7.27-7.23 (m, 3H), 7.13 (d,  $J = 7.9$  Hz, 2H), 7.05 (d,  $J = 7.8$  Hz, 2H), 6.21 (d,  $J = 15.8$  Hz, 1H), 6.08-6.02 (m, 1H), 4.09-4.00 (m, 2H), 3.30 (dd,  $J = 13.9, 7.4$  Hz, 1H), 3.01 (dd,  $J = 13.9, 7.4$  Hz, 1H), 2.30 (s, 3H), 0.94 (t,  $J = 7.1$  Hz, 3H) ppm;  $^{13}\text{C NMR}$  (125 MHz,  $\text{CDCl}_3$ )  $\delta$  195.3, 170.8, 138.2,

137.0, 136.0, 134.6, 133.5, 132.4, 129.6, 129.1, 128.5, 128.1, 127.9, 127.4, 126.1, 123.8, 66.0, 61.3, 43.6, 21.2, 13.7 ppm; **HRMS** (ESI)  $m/z$  calcd for  $\text{C}_{27}\text{H}_{27}\text{O}_3^+$  [ $\text{M}+\text{H}^+$ ]: 399.1955, found 399.1957.

**Ethyl (*E*)-2-benzoyl-5-(2-methoxyphenyl)-2-phenylpent-4-enoate 3ad.**  $^1\text{H NMR}$  (500 MHz,

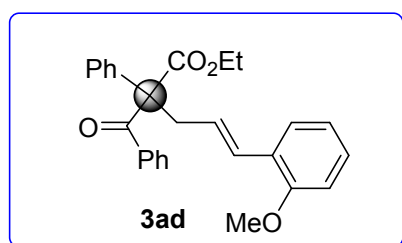

$\text{CDCl}_3$ )  $\delta$  7.73-7.71 (m, 2H), 7.65-7.63 (m, 2H), 7.41-7.37 (m, 1H), 7.33-7.29 (m, 3H), 7.27-7.23 (m, 3H), 7.18-7.15 (m, 1H), 6.88-6.85 (m, 1H), 6.81-6.79 (m, 1H), 6.62 (d,  $J = 16.0$  Hz, 1H), 6.10-6.04 (m, 1H), 4.08-4.02 (m, 2H), 3.77 (s, 3H), 3.34 (dd,  $J = 13.8, 7.8$  Hz, 1H), 3.05 (dd,  $J = 13.8, 7.2$  Hz, 1H), 0.97 (t,  $J = 7.1$  Hz, 3H) ppm;  $^{13}\text{C NMR}$  (125 MHz,  $\text{CDCl}_3$ )  $\delta$  195.3,

170.8, 156.4, 138.2, 136.0, 132.4, 129.5, 128.5, 128.4, 128.3, 128.1, 128.0, 127.3, 126.8, 126.6, 125.4, 120.6, 110.8, 66.1, 61.3, 55.4, 43.9, 13.7 ppm; **HRMS** (ESI)  $m/z$  calcd for  $\text{C}_{27}\text{H}_{27}\text{O}_4^+$  [ $\text{M}+\text{H}^+$ ]: 415.1904, found 415.1909.

**Ethyl (*E*)-2-benzoyl-5-(3-methoxyphenyl)-2-phenylpent-4-enoate 3ae.**  $^1\text{H NMR}$  (500 MHz,

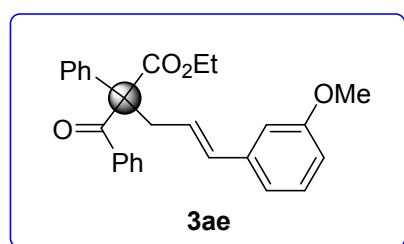

$\text{CDCl}_3$ )  $\delta$  7.72-7.71 (m, 2H), 7.63-7.61 (m, 2H), 7.41-7.38 (m, 1H), 7.33-7.30 (m, 2H), 7.28-7.25 (m, 3H), 7.18-7.15 (m, 1H), 6.84-6.83 (m, 1H), 6.77-6.73 (m, 2H), 6.22 (d,  $J = 15.8$  Hz, 1H), 6.13-6.07 (m, 1H), 4.10-4.01 (m, 2H), 3.78 (s, 3H), 3.30 (dd,  $J = 14.0, 7.4$  Hz, 1H), 3.03 (dd,  $J = 14.0, 7.4$  Hz, 1H), 0.95 (t,  $J = 7.1$  Hz, 3H) ppm;  $^{13}\text{C NMR}$  (125 MHz,  $\text{CDCl}_3$ )  $\delta$  195.2, 170.7,

159.7, 138.8, 138.1, 136.0, 133.5, 132.4, 129.6, 129.4, 128.5, 128.1, 127.9, 127.4, 125.3, 118.9, 112.7, 111.7, 66.0, 61.3, 55.2, 43.5, 13.7 ppm; **HRMS** (ESI)  $m/z$  calcd for  $\text{C}_{27}\text{H}_{27}\text{O}_4^+$  [ $\text{M}+\text{H}^+$ ]: 415.1904, found 415.1908.

**Ethyl (*E*)-2-benzoyl-5-(4-methoxyphenyl)-2-phenylpent-4-enoate 3af.**  $^1\text{H NMR}$  (500 MHz,

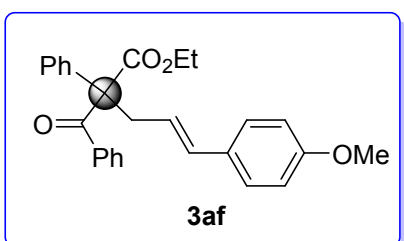

$\text{CDCl}_3$ )  $\delta$  7.72-7.70 (m, 2H), 7.63-7.61 (m, 2H), 7.39 (t,  $J = 7.4$  Hz, 1H), 7.31 (t,  $J = 7.6$  Hz, 2H), 7.27-7.23 (m, 3H), 7.17 (d,  $J = 8.4$  Hz, 2H), 6.79 (d,  $J = 8.5$  Hz, 2H), 6.19 (d,  $J = 15.8$  Hz, 1H), 5.99-5.93 (m, 1H), 4.07-4.02 (m, 2H), 3.77 (s, 3H), 3.29 (dd,  $J = 14.0, 7.5$  Hz, 1H), 3.01 (dd,  $J = 13.9, 6.9$  Hz, 1H), 0.94 (t,  $J =$

7.1 Hz, 3H) ppm;  $^{13}\text{C}$  NMR (125 MHz,  $\text{CDCl}_3$ )  $\delta$  195.3, 170.8, 159.0, 138.2, 136.0, 133.0, 132.4, 130.3, 129.5, 128.5, 128.1, 127.9, 127.4, 127.3, 122.6, 113.9, 66.1, 61.2, 55.3, 43.6, 13.7 ppm; HRMS (ESI)  $m/z$  calcd for  $\text{C}_{27}\text{H}_{27}\text{O}_4^+$  [ $\text{M}+\text{H}^+$ ]: 415.1904, found 415.1906.

**Ethyl (*E*)-2-benzoyl-5-(2-fluorophenyl)-2-phenylpent-4-enoate 3ag.**  $^1\text{H}$  NMR (500 MHz,  $\text{CDCl}_3$ )  $\delta$

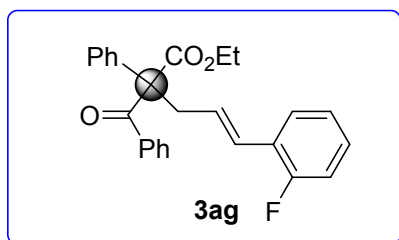

7.65-7.64 (m, 2H), 7.57-7.55 (m, 2H), 7.34-7.30 (m, 1H), 7.27-7.23 (m, 3H), 7.20-7.17 (m, 3H), 7.10-7.05 (m, 1H), 6.97-6.94 (m, 1H), 6.91-6.87 (m, 1H), 6.36 (d,  $J = 15.9$  Hz, 1H), 6.13-6.07 (m, 1H), 3.99 (q,  $J = 7.1$  Hz, 2H), 3.25 (dd,  $J = 13.9, 7.8$  Hz, 1H), 2.99 (dd,  $J = 13.8, 7.2$  Hz, 1H), 0.89 (t,  $J = 7.1$  Hz, 3H) ppm;  $^{13}\text{C}$  NMR (125 MHz,  $\text{CDCl}_3$ )  $\delta$  195.2, 170.7, 160.9,

159.0, 138.1, 135.9, 132.5, 129.6, 128.51 (d,  $J_{\text{CF}} = 15.3$  Hz), 128.2, 127.9, 127.6 (d,  $J_{\text{CF}} = 3.4$  Hz), 127.5, 127.3 (d,  $J_{\text{CF}} = 3.7$  Hz), 125.9 (d,  $J_{\text{CF}} = 3.4$  Hz), 125.1 (d,  $J_{\text{CF}} = 12.2$  Hz), 124.0 (d,  $J_{\text{CF}} = 3.0$  Hz), 115.5 (d,  $J_{\text{CF}} = 21.9$  Hz), 65.9, 61.4, 43.9, 13.7 ppm; HRMS (ESI)  $m/z$  calcd for  $\text{C}_{26}\text{H}_{24}\text{FO}_3^+$  [ $\text{M}+\text{H}^+$ ]: 403.1704, found 403.1708.

**Ethyl (*E*)-2-benzoyl-5-(2-chlorophenyl)-2-phenylpent-4-enoate 3ah.**  $^1\text{H}$  NMR (500 MHz,  $\text{CDCl}_3$ )

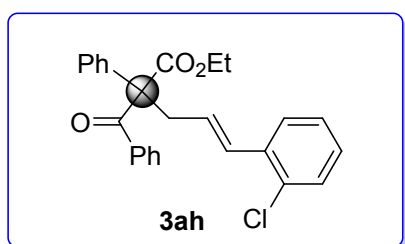

$\delta$  7.74-7.72 (m, 2H), 7.65-7.64 (m, 2H), 7.41-7.37 (m, 2H), 7.34-7.31 (m, 2H), 7.28-7.24 (m, 4H), 7.16-7.19 (m, 2H), 6.66 (d,  $J = 15.8$  Hz, 1H), 6.12-6.06 (m, 1H), 4.12-4.03 (m, 2H), 3.35 (dd,  $J = 14.0, 7.9$  Hz, 1H), 3.10 (dd,  $J = 14.0, 7.3$  Hz, 1H), 0.96 (t,  $J = 7.1$  Hz, 3H) ppm;  $^{13}\text{C}$  NMR (125 MHz,  $\text{CDCl}_3$ )  $\delta$  195.1, 170.7,

138.0, 135.9, 135.5, 132.7, 132.5, 129.9, 129.6, 129.5, 128.6, 128.3, 128.2, 127.9, 127.9, 127.5, 127.0, 126.8, 65.9, 61.4, 43.6, 13.7 ppm; HRMS (ESI)  $m/z$  calcd for  $\text{C}_{26}\text{H}_{24}\text{ClO}_3^+$  [ $\text{M}+\text{H}^+$ ]: 419.1409, found 419.1409.

**Ethyl (*E*)-2-benzoyl-5-(3-chlorophenyl)-2-phenylpent-4-enoate 3ai.**  $^1\text{H}$  NMR (500 MHz,  $\text{CDCl}_3$ )  $\delta$

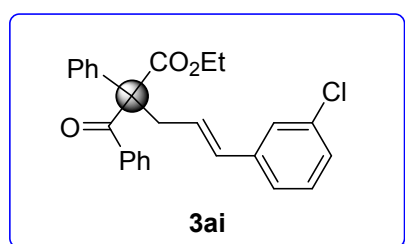

7.72-7.70 (m, 2H), 7.62-7.60 (m, 2H), 7.41-7.38 (m, 1H), 7.34-7.31 (m, 2H), 7.28-7.25 (m, 3H), 7.21-7.08 (m, 4H), 6.18 (d,  $J = 16.0$  Hz, 1H), 6.15-6.10 (m, 1H), 4.11-4.01 (m, 2H), 3.29 (dd,  $J = 14.1, 6.9$  Hz, 1H), 3.04 (dd,  $J = 14.1, 6.9$  Hz, 1H), 0.95 (t,  $J = 7.1$  Hz, 3H) ppm;  $^{13}\text{C}$  NMR (125 MHz,  $\text{CDCl}_3$ )  $\delta$  195.1, 170.7,

139.2, 138.0, 135.9, 134.4, 132.5, 132.3, 129.7, 129.6, 128.6, 128.2, 127.9, 127.5, 127.2, 126.7, 126.1, 124.4, 65.9, 61.3, 43.5, 13.7 ppm; HRMS (ESI)  $m/z$  calcd for  $\text{C}_{26}\text{H}_{24}\text{ClO}_3^+$  [ $\text{M}+\text{H}^+$ ]: 419.1409, found 419.1410.

**Ethyl (*E*)-2-benzoyl-5-(4-chlorophenyl)-2-phenylpent-4-enoate 3aj.**  $^1\text{H}$  NMR (500 MHz,  $\text{CDCl}_3$ )  $\delta$

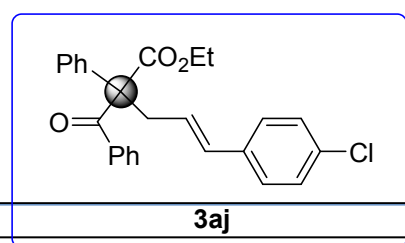

7.72-7.70 (m, 2H), 7.62-7.61 (m, 2H), 7.41-7.38 (m, 1H), 7.34-7.30 (m, 2H), 7.28-7.24 (m, 3H), 7.22-7.20 (m, 2H), 7.16-7.14 (m, 2H), 6.19 (d,  $J = 15.8$  Hz, 1H), 6.12-6.06 (m, 1H), 4.10-4.00

(m, 2H), 3.29 (dd,  $J = 14.0, 7.3$  Hz, 1H), 3.03 (dd,  $J = 14.0, 7.4$  Hz, 1H), 0.94 (t,  $J = 7.1$  Hz, 3H) ppm;  $^{13}\text{C}$  NMR (125 MHz,  $\text{CDCl}_3$ )  $\delta$  195.1, 170.7, 138.1, 135.9, 135.8, 132.8, 132.5, 132.4, 129.5, 128.6, 128.5, 128.2, 127.9, 127.5, 127.4, 125.8, 65.9, 61.3, 43.5, 13.7 ppm; HRMS (ESI)  $m/z$  calcd for  $\text{C}_{26}\text{H}_{24}\text{ClO}_3^+$  [ $\text{M}+\text{H}^+$ ]: 419.1409, found 419.1410.

**Ethyl (*E*)-2-benzoyl-5-(4-bromophenyl)-2-phenylpent-4-enoate 3ak.**  $^1\text{H}$  NMR (500 MHz,  $\text{CDCl}_3$ )

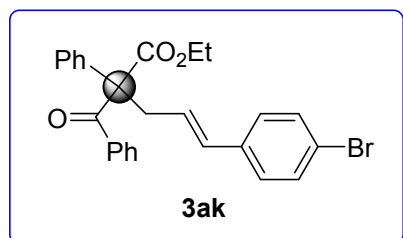

$\delta$  7.73-7.70 (m, 2H), 7.64-7.60 (m, 2H), 7.40-7.33 (m, 2H), 7.31-7.27 (m, 2H), 7.25-7.23 (m, 5H), 7.16-7.07 (m, 1H), 6.21 (dd,  $J = 40.1, 15.8$  Hz, 1H), 6.14-6.08 (m, 1H), 4.09-4.00 (m, 2H), 3.34-3.26 (m, 1H), 3.06-3.01 (m, 1H), 0.94 (t,  $J = 8.9$  Hz, 3H) ppm;  $^{13}\text{C}$  NMR (125 MHz,  $\text{CDCl}_3$ )  $\delta$  195.2, 170.8, 138.2, 137.4, 136.0, 133.7, 132.4, 131.6, 129.6, 128.4, 128.1, 127.9,

127.7, 127.4, 126.2, 124.9, 65.99, 61.28, 43.59, 13.73 ppm; HRMS (ESI)  $m/z$  calcd for  $\text{C}_{26}\text{H}_{24}\text{BrO}_3^+$  [ $\text{M}+\text{H}^+$ ]: 463.0903, found 463.0901.

**Ethyl (*E*)-2-benzoyl-5-(naphthalen-1-yl)-2-phenylpent-4-enoate 3al.**  $^1\text{H}$  NMR (500 MHz,  $\text{CDCl}_3$ )

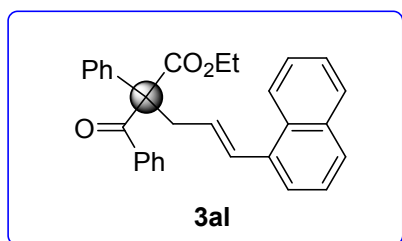

$\delta$  7.82-7.79 (m, 2H), 7.76-7.71 (m, 3H), 7.67-7.66 (m, 2H), 7.45-7.42 (m, 3H), 7.40-7.37 (m, 2H), 7.35-7.32 (m, 2H), 7.29-7.25 (m, 3H), 6.93 (d,  $J = 15.5$  Hz, 1H), 6.16-6.09 (m, 1H), 4.16-4.02 (m, 2H), 3.42 (dd,  $J = 13.8, 7.4$  Hz, 1H), 3.19 (dd,  $J = 13.8, 7.6$  Hz, 1H), 0.94 (t,  $J = 7.1$  Hz, 3H) ppm;  $^{13}\text{C}$  NMR (125 MHz,  $\text{CDCl}_3$ )  $\delta$  195.3, 170.9, 138.2, 135.9, 135.2, 133.5, 132.5, 131.4,

131.1, 129.6, 128.6, 128.4, 128.2, 128.1, 128.0, 127.6, 127.4, 125.8, 125.7, 125.6, 124.0, 123.9, 66.0, 61.4, 43.9, 13.7 ppm; HRMS (ESI)  $m/z$  calcd for  $\text{C}_{30}\text{H}_{27}\text{O}_3^+$  [ $\text{M}+\text{H}^+$ ]: 435.1955, found 435.1956.

**Ethyl (*E*)-2-benzoyl-2-phenyl-5-(thiophen-2-yl)pent-4-enoate 3am.**  $^1\text{H}$  NMR (500 MHz,  $\text{CDCl}_3$ )  $\delta$

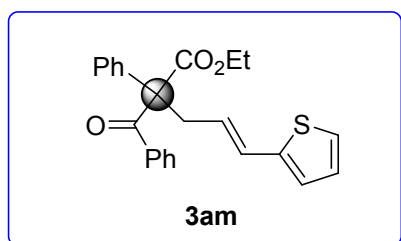

7.72-7.70 (m, 2H), 7.61-7.60 (m, 2H), 7.41-7.38 (m, 1H), 7.33-7.30 (m, 2H), 7.28-7.24 (m, 3H), 7.07 (d,  $J = 5.1$  Hz, 1H), 6.90-6.88 (m, 1H), 6.80 (d,  $J = 3.6$  Hz, 1H), 6.37 (d,  $J = 15.6$  Hz, 1H), 5.98-5.92 (m, 1H), 4.10-4.01 (m, 2H), 3.28 (dd,  $J = 13.9, 7.6$  Hz, 1H), 2.97 (dd,  $J = 13.9, 7.7$  Hz, 1H), 0.95 (t,  $J = 7.1$  Hz, 3H) ppm;  $^{13}\text{C}$  NMR (125 MHz,  $\text{CDCl}_3$ )  $\delta$  195.1, 170.7, 142.4,

138.1, 135.9, 132.5, 129.6, 128.6, 128.1, 127.9, 127.5, 127.2, 126.7, 124.9, 124.7, 123.8, 65.9, 61.3, 43.6, 13.7 ppm; HRMS (ESI)  $m/z$  calcd for  $\text{C}_{24}\text{H}_{23}\text{O}_3\text{S}^+$  [ $\text{M}+\text{H}^+$ ]: 391.1363, found 391.1368.

**Ethyl (*E*)-2-benzoyl-2-phenylhex-4-enoate 3an.**  $^1\text{H}$  NMR (500 MHz,  $\text{CDCl}_3$ )  $\delta$  7.70-7.69 (m, 2H),

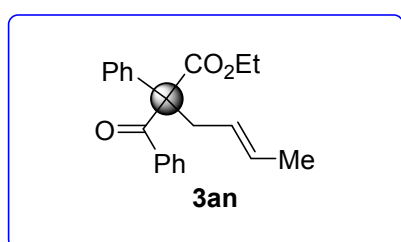

7.60-7.59 (m, 2H), 7.39-7.36 (m, 1H), 7.32-7.29 (m, 2H), 7.36-7.23 (m, 3H), 5.34-5.33 (m, 2H), 4.05 (q,  $J = 7.1$  Hz, 2H), 3.09 (dd,  $J = 14.8, 4.0$  Hz, 1H), 2.83 (dd,  $J = 15.0, 3.9$  Hz, 1H), 1.57 (d,  $J = 3.1$  Hz, 3H), 0.96 (t,  $J = 7.1$  Hz, 3H) ppm;  $^{13}\text{C}$  NMR

(126 MHz, CDCl<sub>3</sub>)  $\delta$  195.4, 170.9, 138.2, 136.0, 132.4, 132.3, 129.5, 128.4, 128.1, 128.0, 127.2, 125.3, 65.7, 61.1, 43.1, 18.0, 13.7 ppm; HRMS (ESI) m/z calcd for C<sub>21</sub>H<sub>23</sub>O<sub>3</sub><sup>+</sup> [M+H<sup>+</sup>]: 323.1642, found 323.1644.

## 6. Reference:

1. P. Müller, Y. Allenbach and Robert, E. *Tetrahedron Asymmetry*, 2003, **14**, 779-785.
2. (a) T. H. West, D. S. B. Daniels, A. M. Z. Slawin and A. D. Smith, *J. Am. Chem. Soc.*, 2014, **136**, 4476-4479; (b) Z.-S. Chen, X.-H. Duan, P.-X. Zhou, S. Ali, J.-Y. Luo and Y.-M. Liang, *Angew. Chem. Int. Ed.*, 2012, **51**, 1370-1374; (c) Z.-S. Chen, L.-Z. Huang, H. J. Jeon, Z. Xuan and S.G. Lee, *ACS Catal.*, 2016, **6**, 4914-4919.
3. (a) A. Gioiello, F. Venturoni, B. Natalini and R. Pellicciari, *J. Org. Chem.*, 2009, **74**, 3520-3523; (b) R. Pellicciari, B. Natalini, B. M. Sadeghpour, M. Marinozzi, J. P. Snyder, B. L. Williamson, J. T. Kuethe and A. Padwa, *J. Am. Chem. Soc.*, 1996, **118**, 1-12.
4. H. B. Mao, Z. K. Tang, H. W. Hu, Y. X. Cheng, W.-H. Zheng and C. J. Zhu, *Chem. Commun.* 2014, **50**, 9773-9775.
5. L. Zhou, Y. Liu, Y. Zhang and J. Wang, *Chem. Commun.*, 2011, **47**, 3622-3624.
6. (a) A. Padwa, Y. S. Kulkarni and Z. Zhang, *J. Org. Chem.*, 1990, **55**, 4144-4153; (b) M. P. Doyle, M. Yan, W. H. Hu and L. S. Gronenberg, *J. Am. Chem. Soc.* 2003, **125**, 4692-4693.
7. W. F. Shi, M. Ma, J. Wang, *Chin. Chem. Lett.*, 2004, **15**, 911-914.



## 7. <sup>1</sup>H and <sup>13</sup>C NMR Spectra for All Compounds :

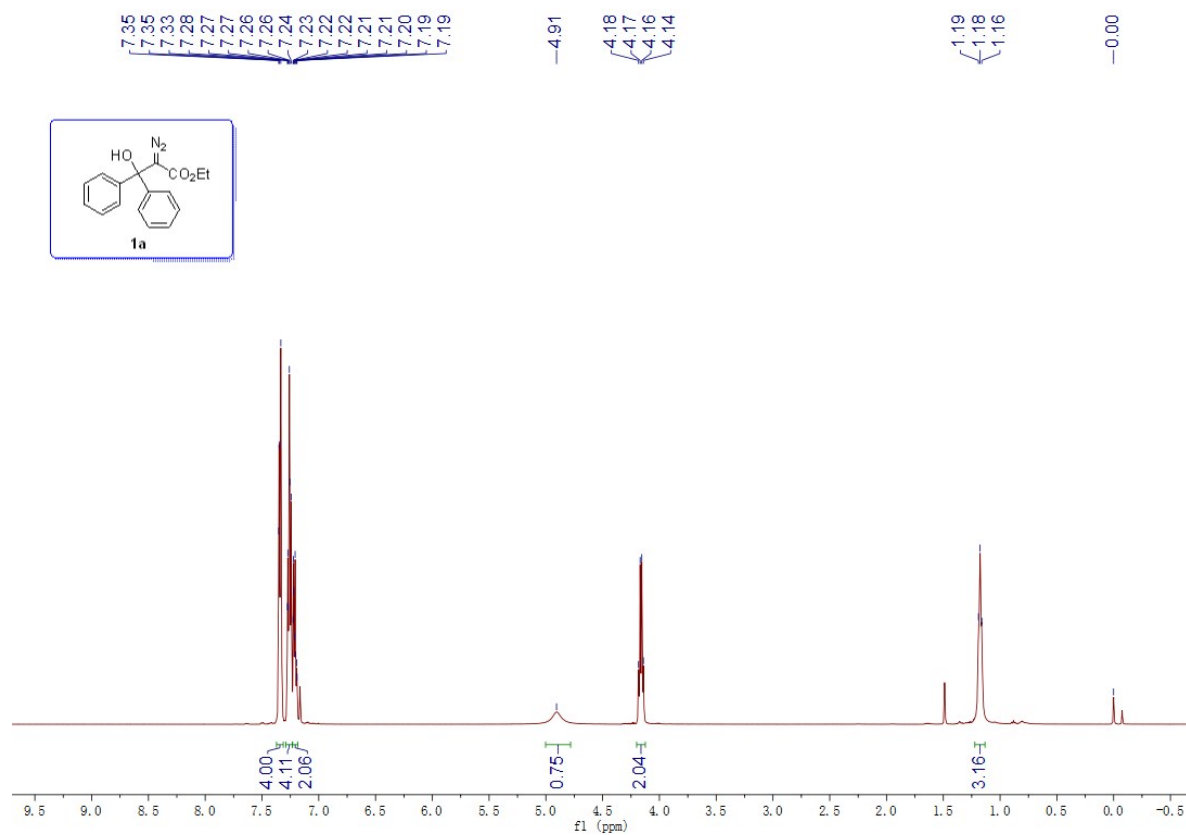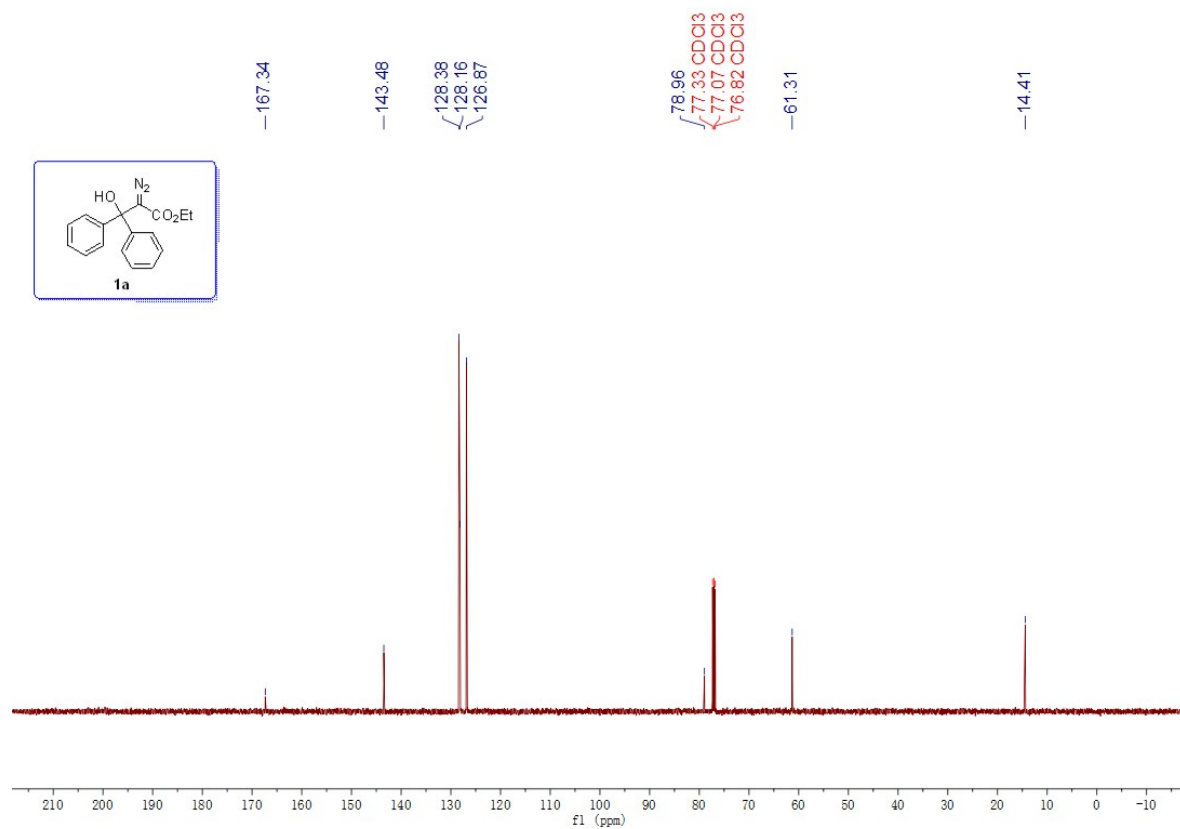

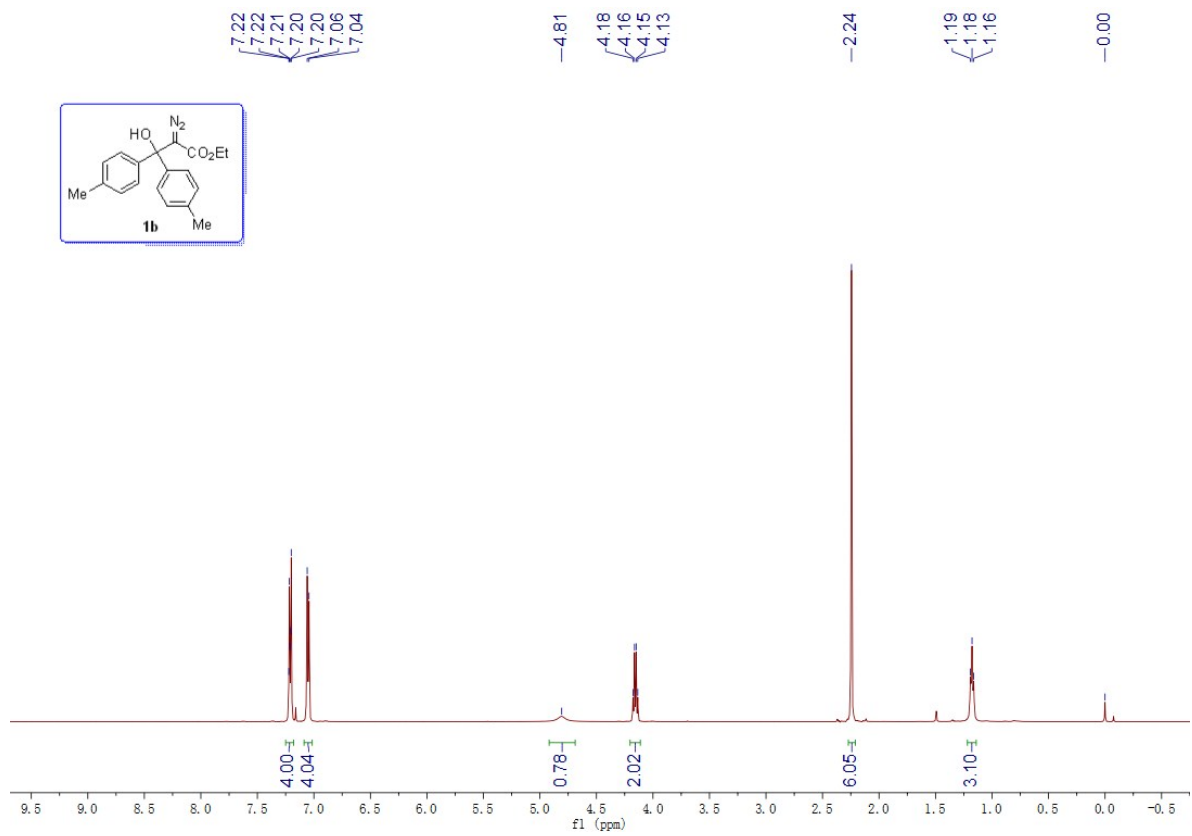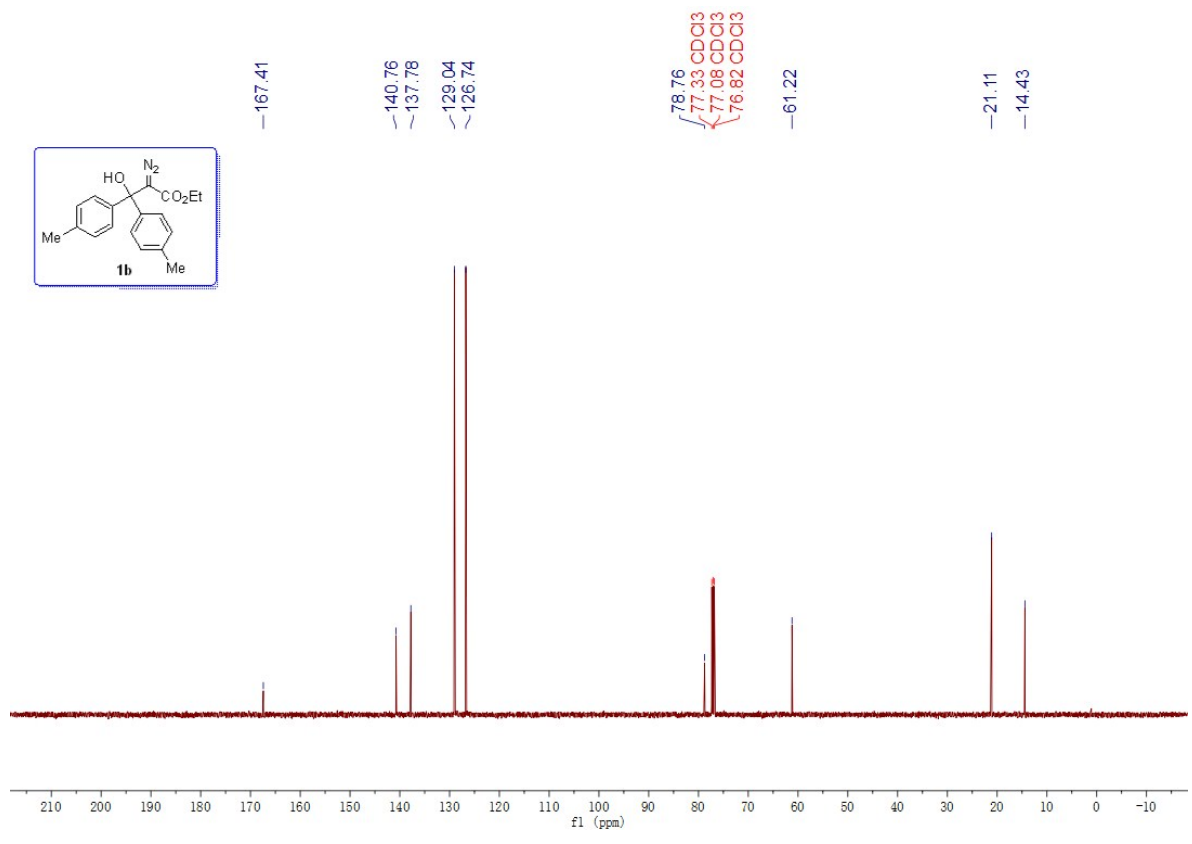

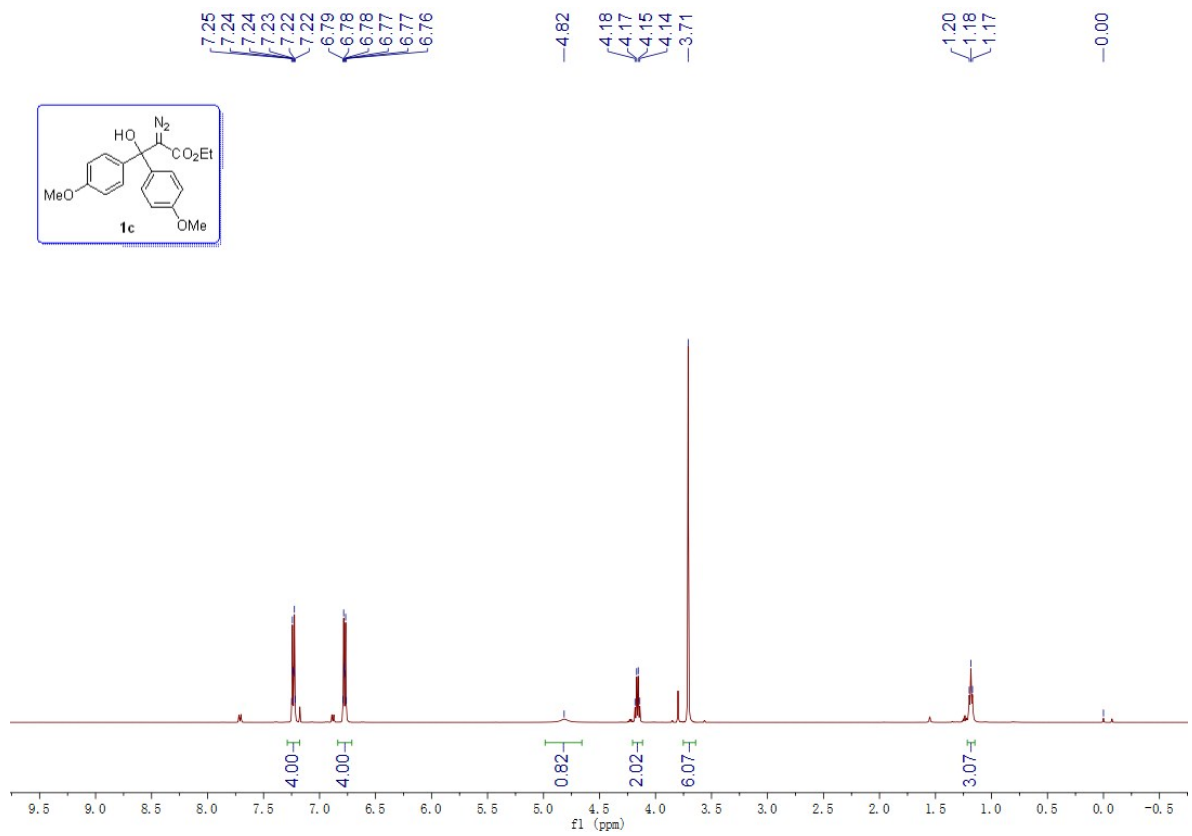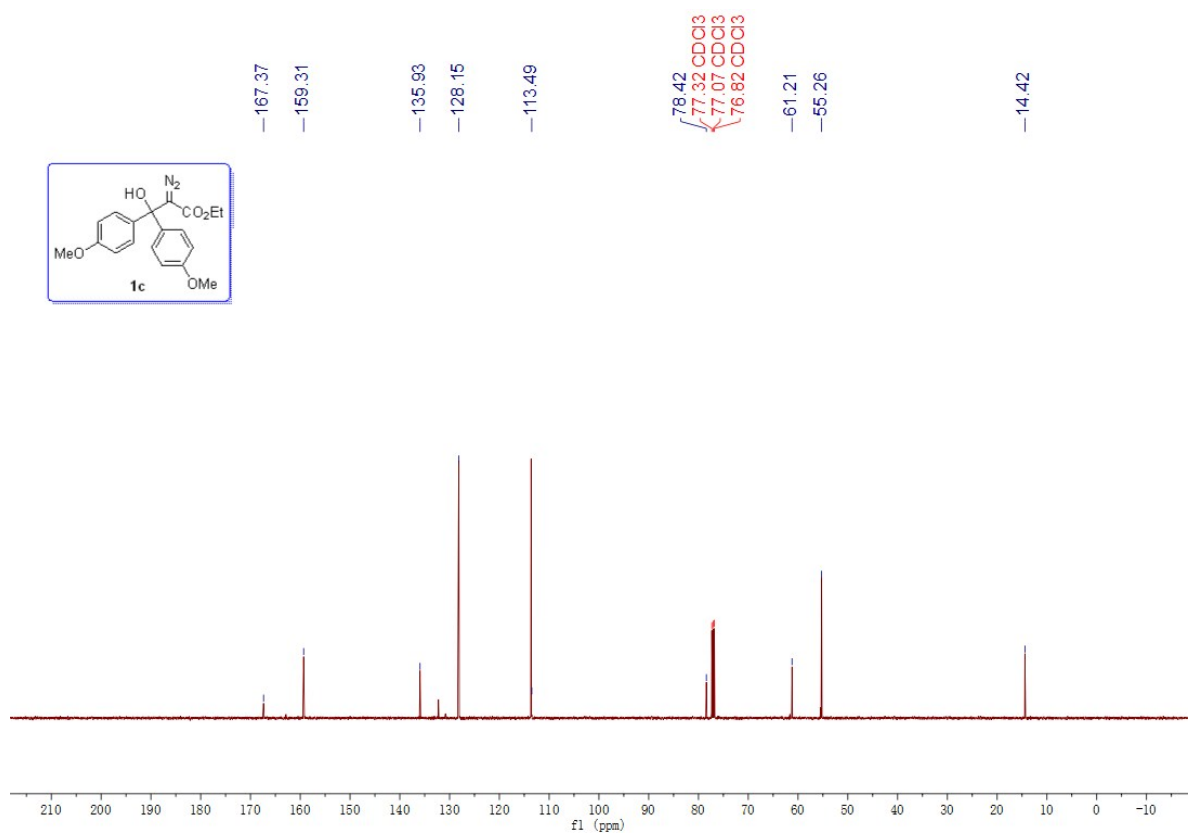

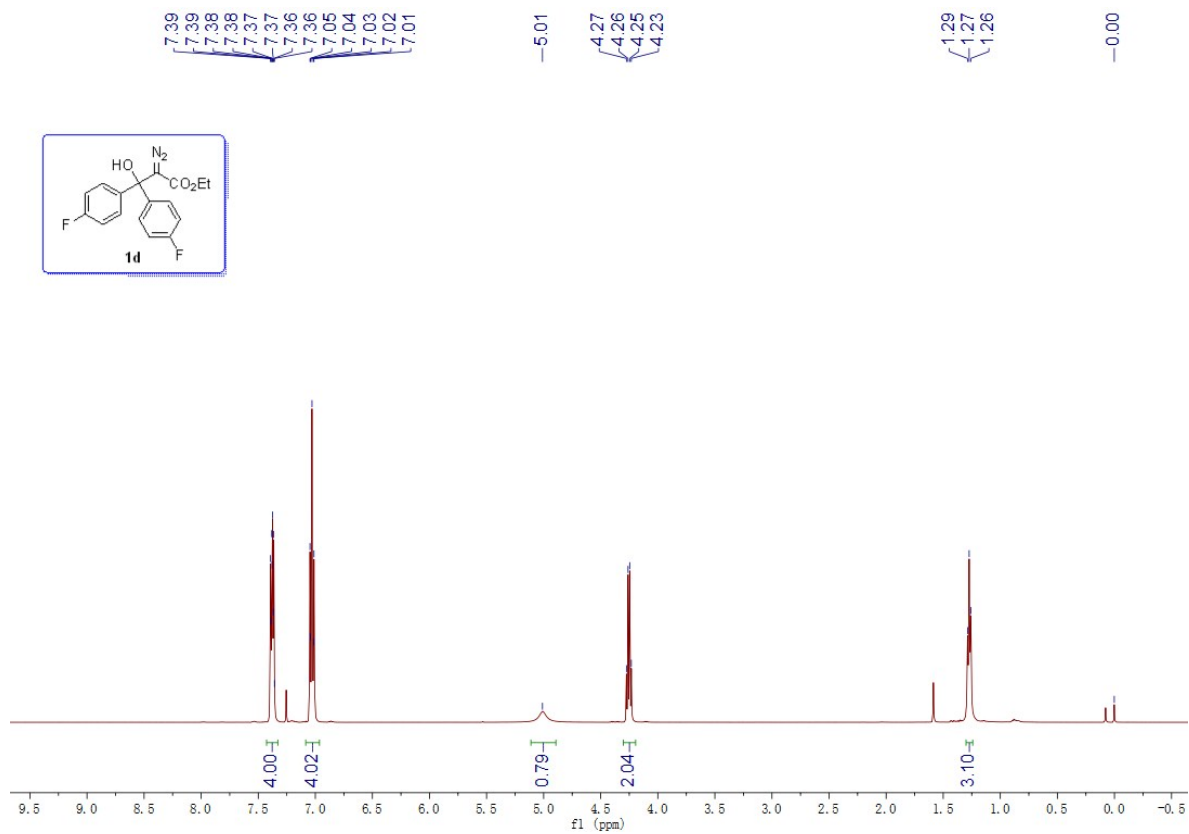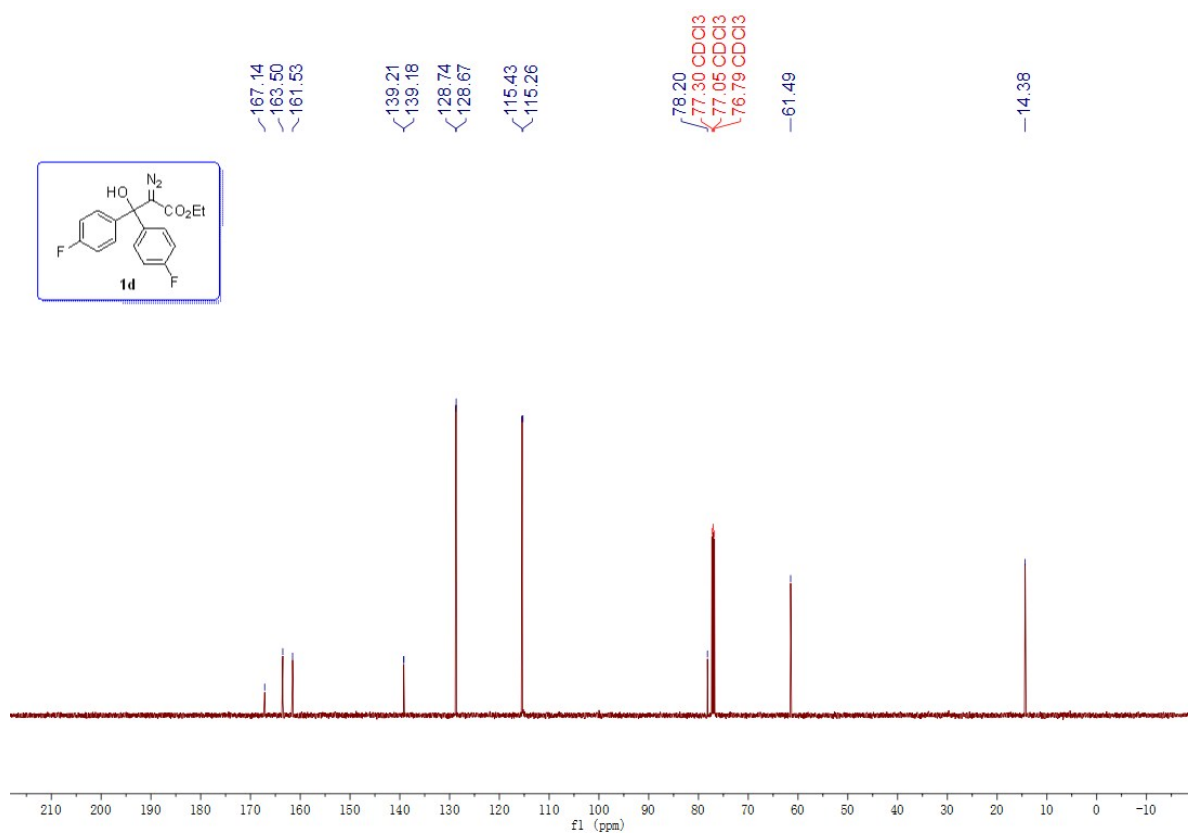

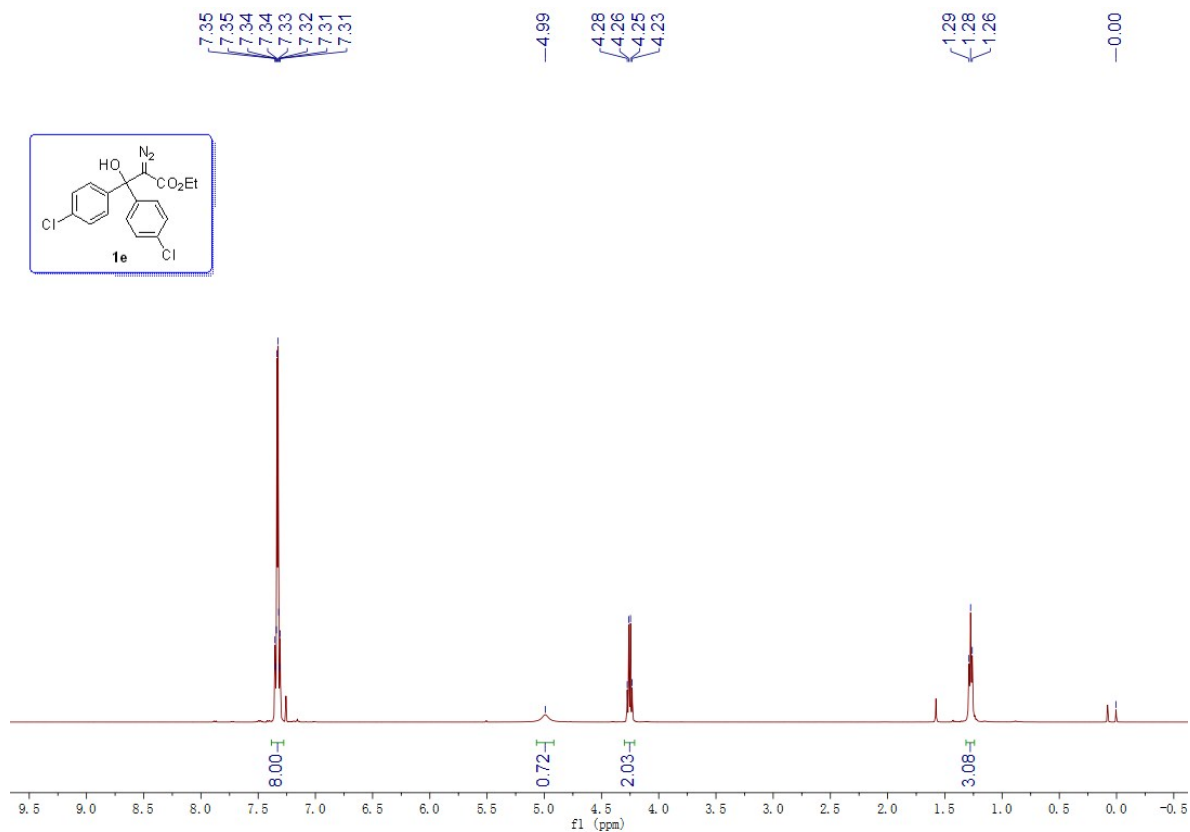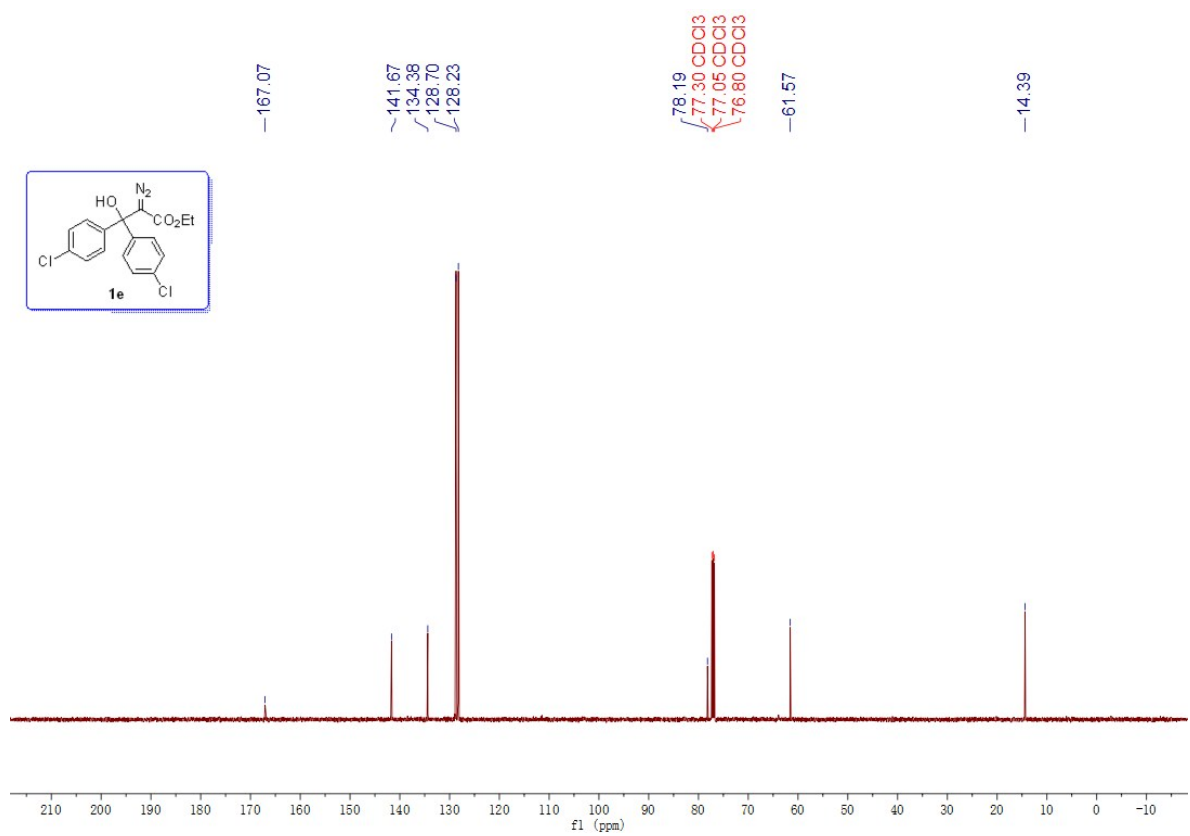

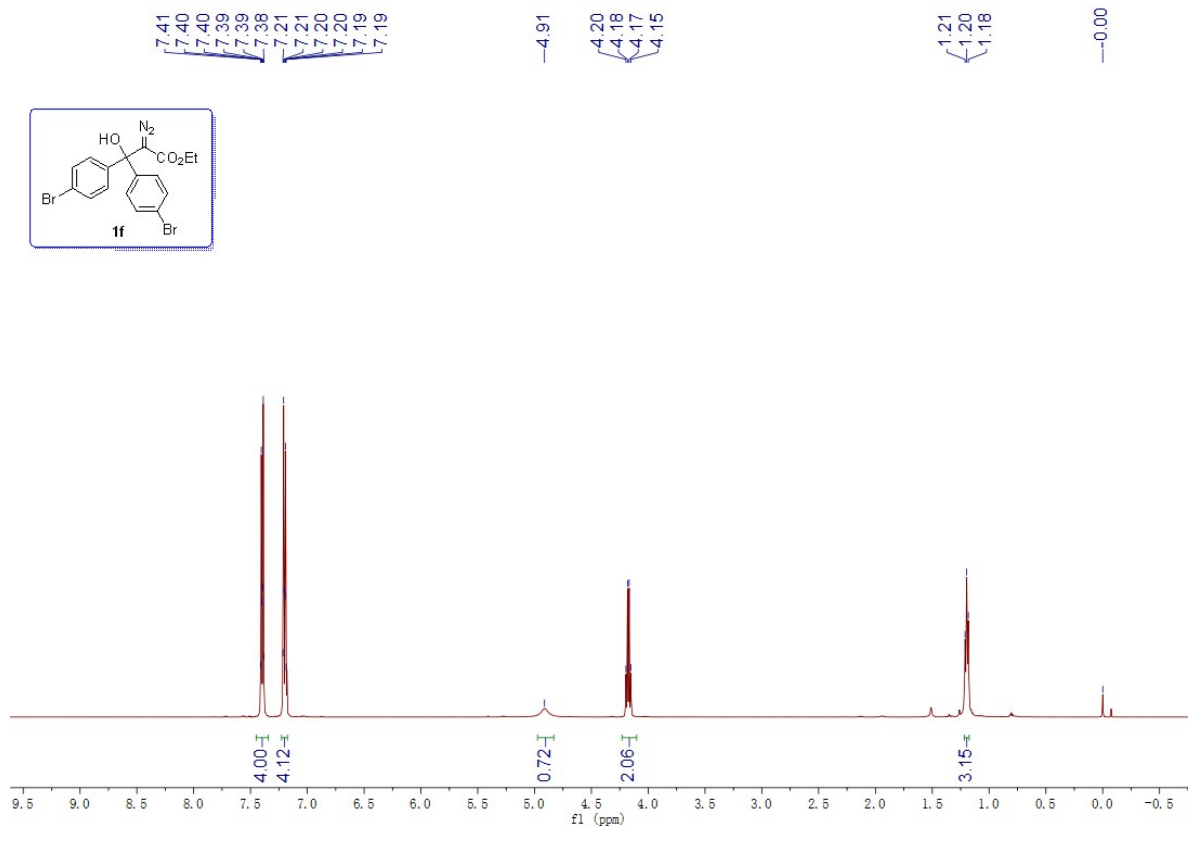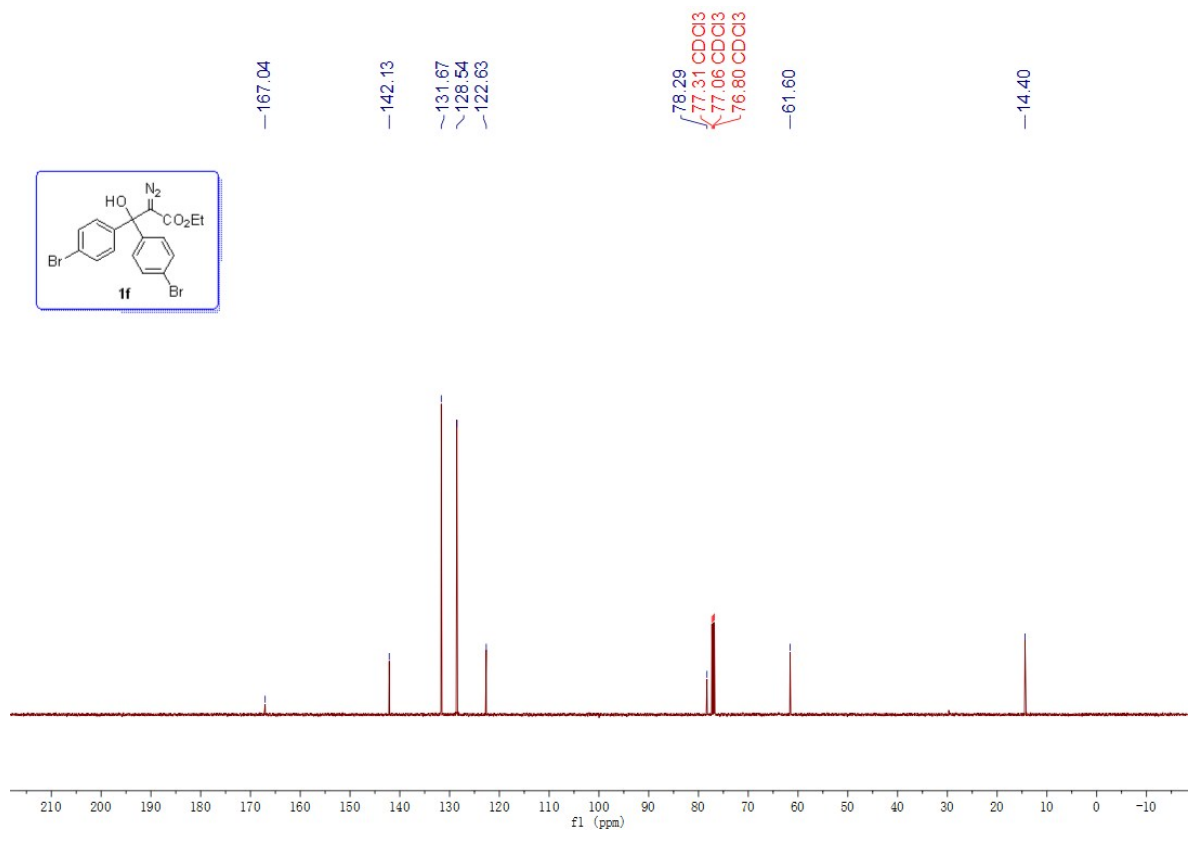

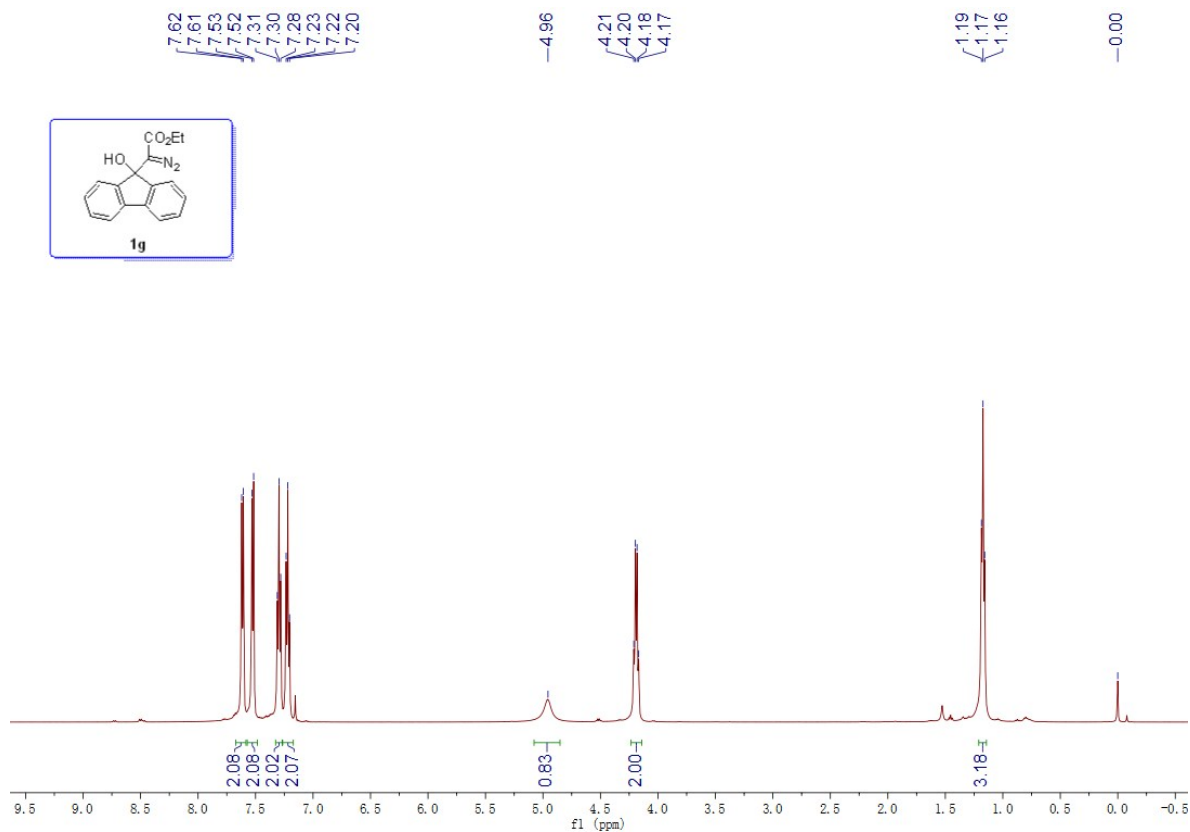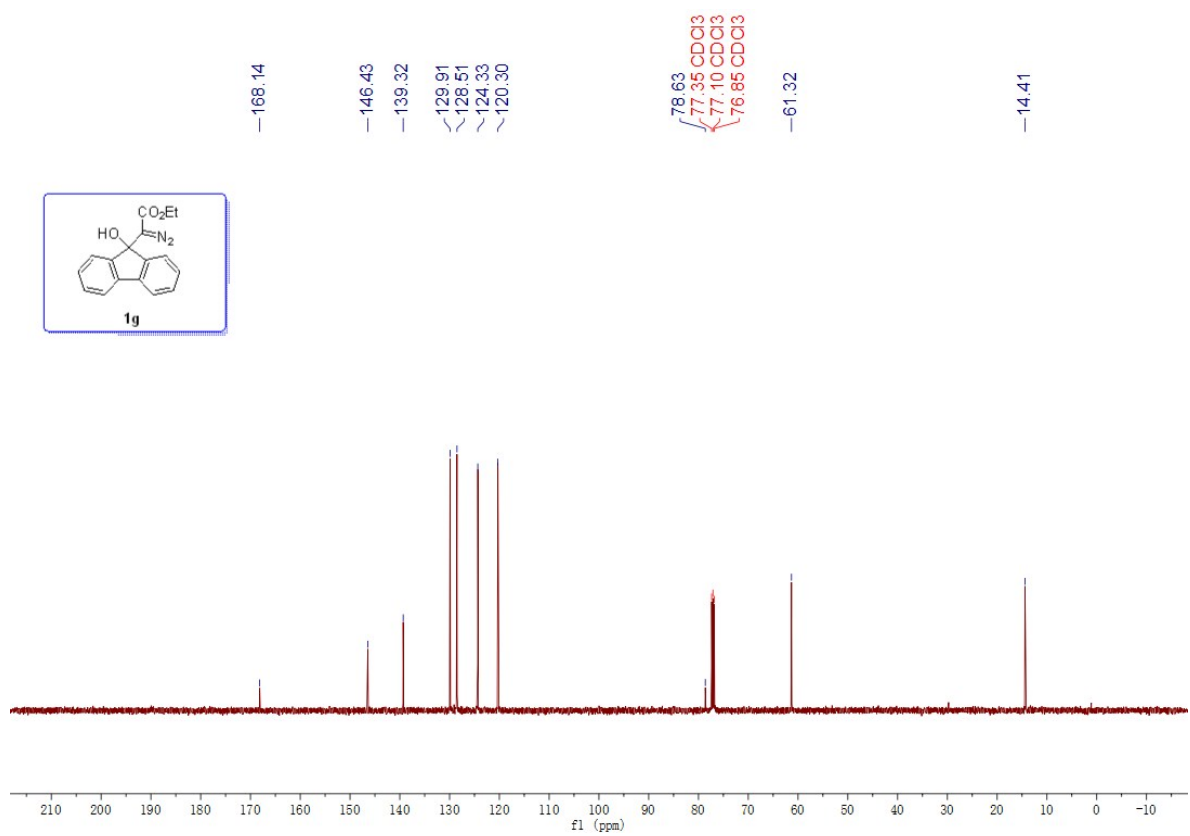

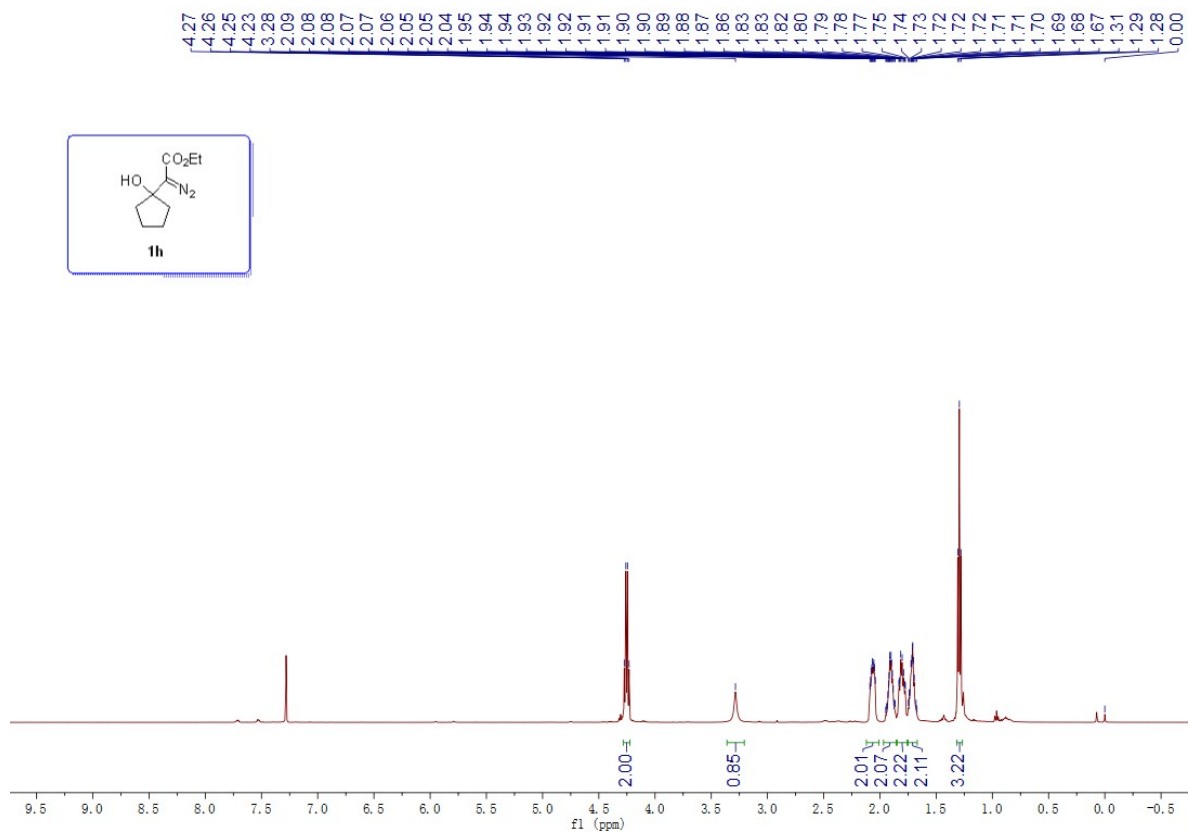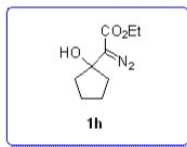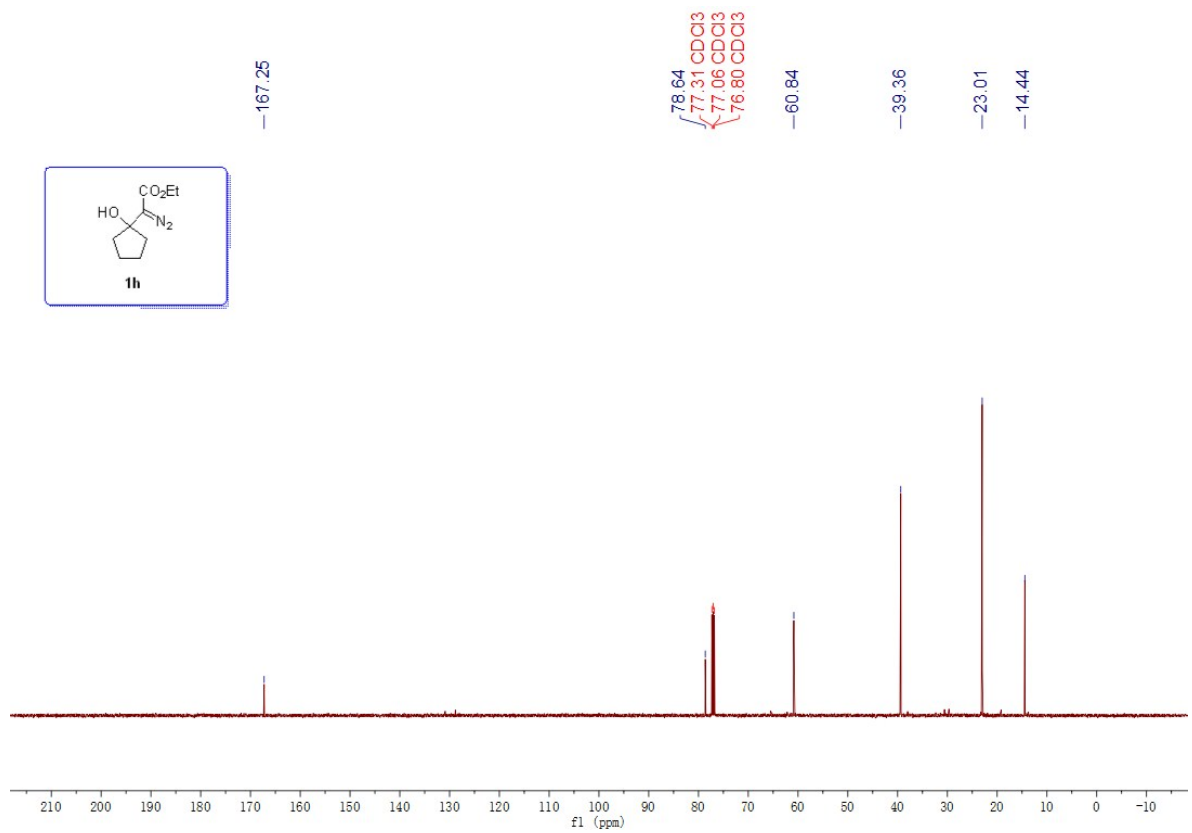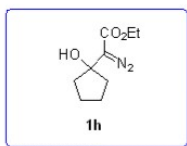



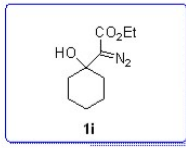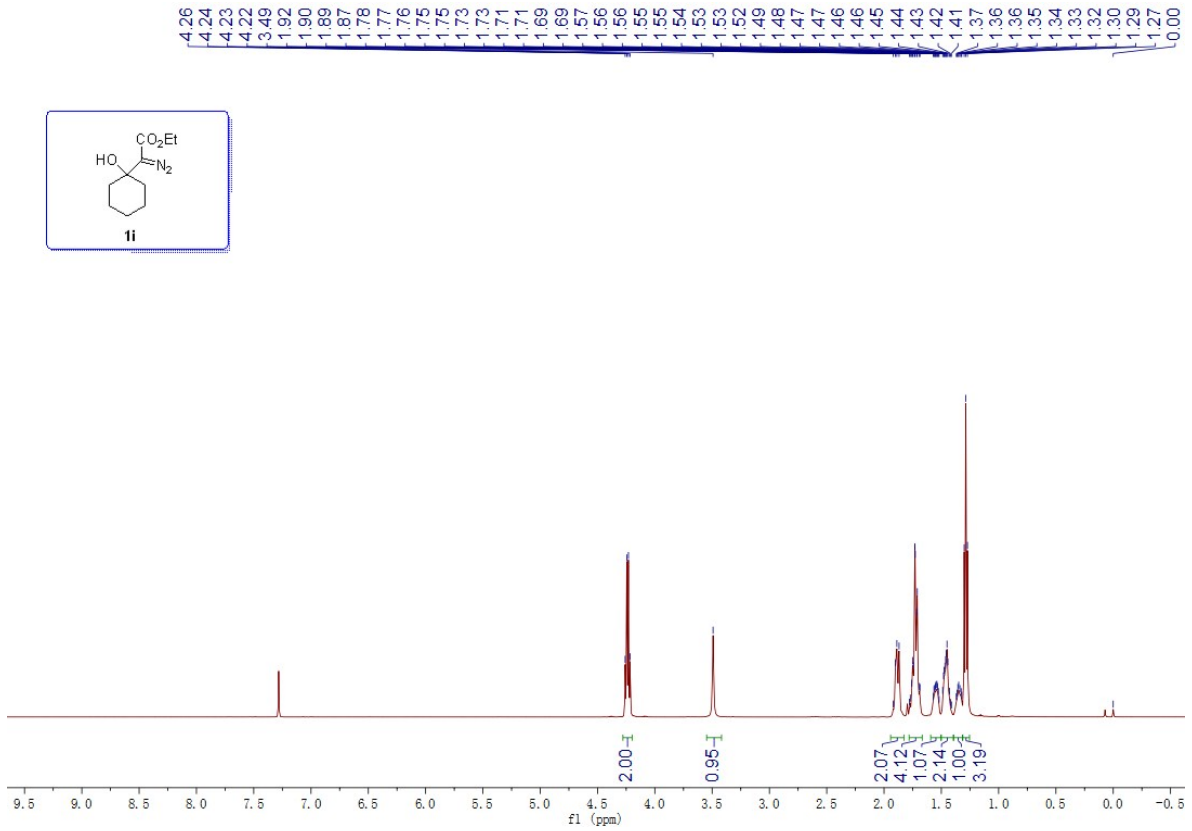

-167.22

77.31 CDCl3  
77.06 CDCl3  
76.80 CDCl3  
70.19

-60.74

-36.43

25.29

22.01

14.42

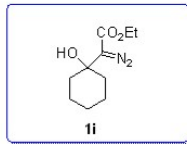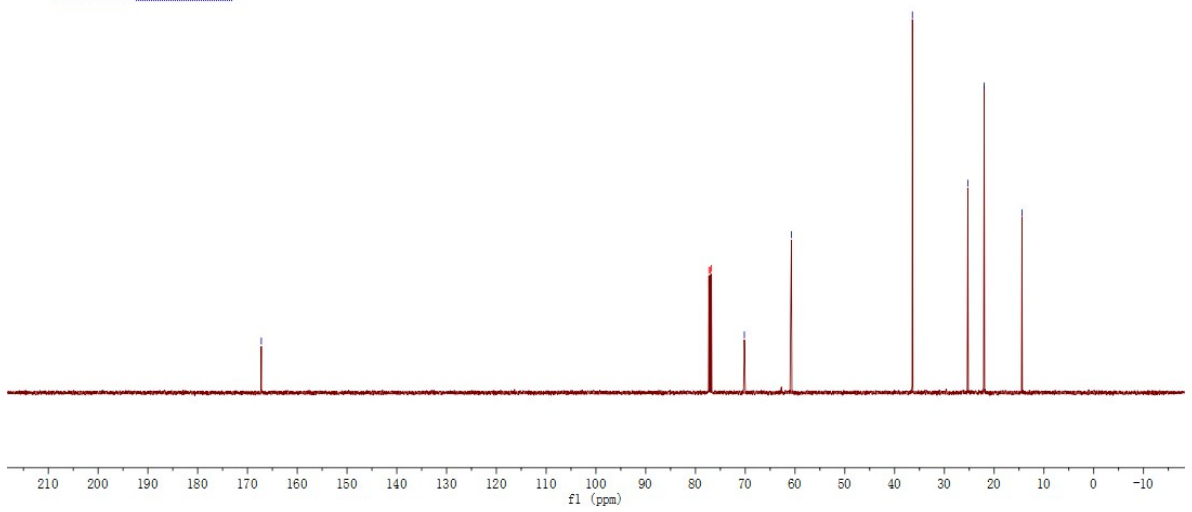

4.26  
4.25  
4.23  
4.22  
3.75  
2.06  
2.05  
2.04  
2.03  
2.02  
2.02  
1.93  
1.91  
1.91  
1.90  
1.88  
1.88  
1.75  
1.74  
1.72  
1.72  
1.71  
1.70  
1.70  
1.68  
1.68  
1.67  
1.66  
1.65  
1.64  
1.63  
1.62  
1.58  
1.58  
1.56  
1.55  
1.54  
1.54  
1.53  
1.51  
1.45  
1.44  
1.43  
1.42  
1.41  
1.41  
1.39  
1.39  
1.30  
1.29  
1.27  
0.00

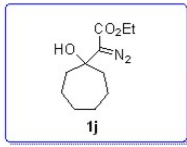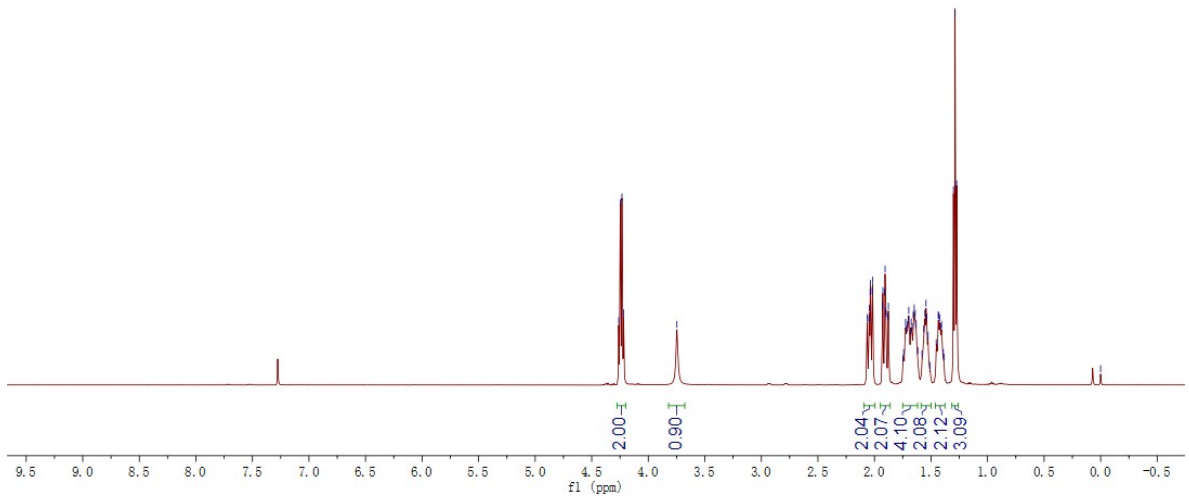

-167.59

77.30 CDCl3  
77.05 CDCl3  
76.79 CDCl3  
74.03

-60.82

-40.20

29.08  
21.86  
14.42

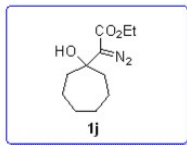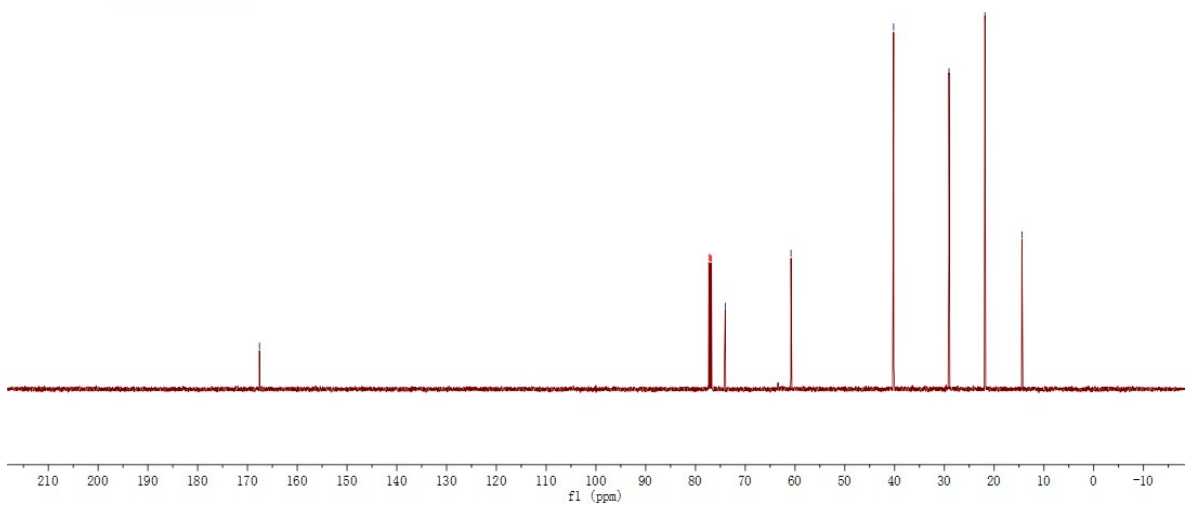

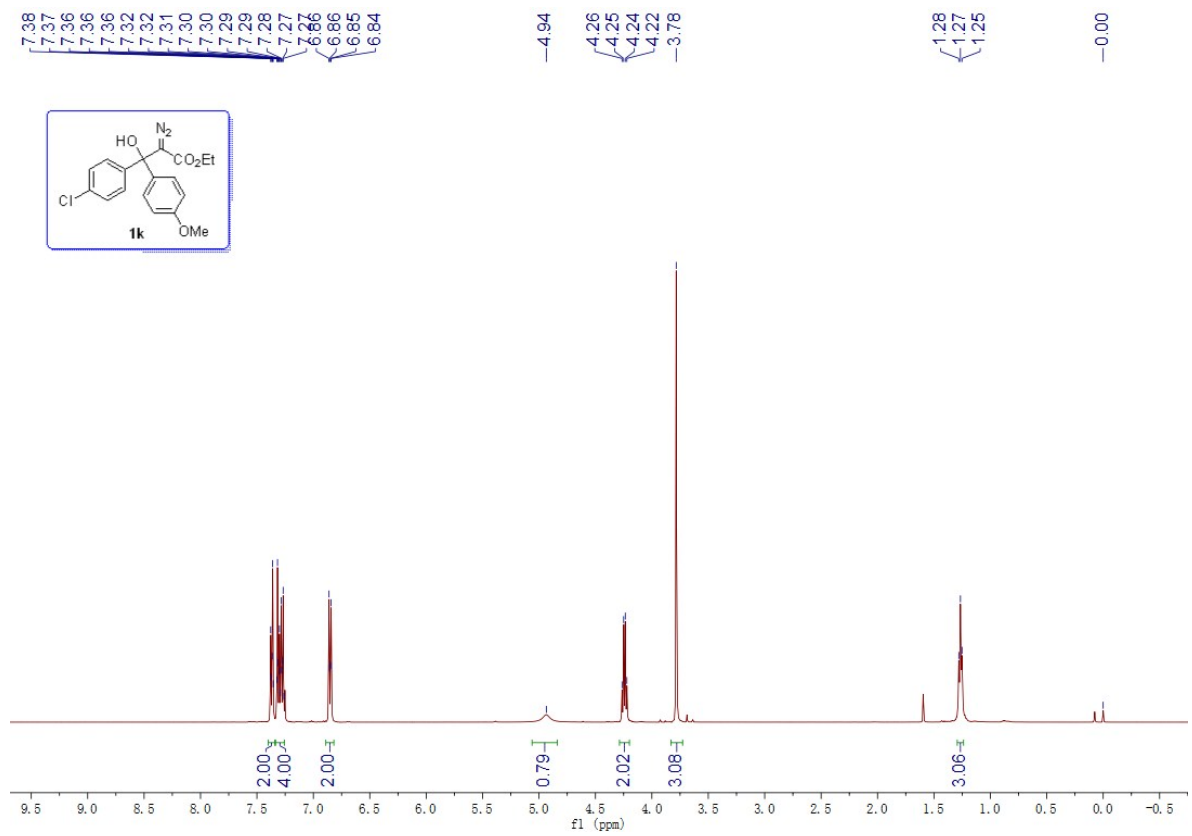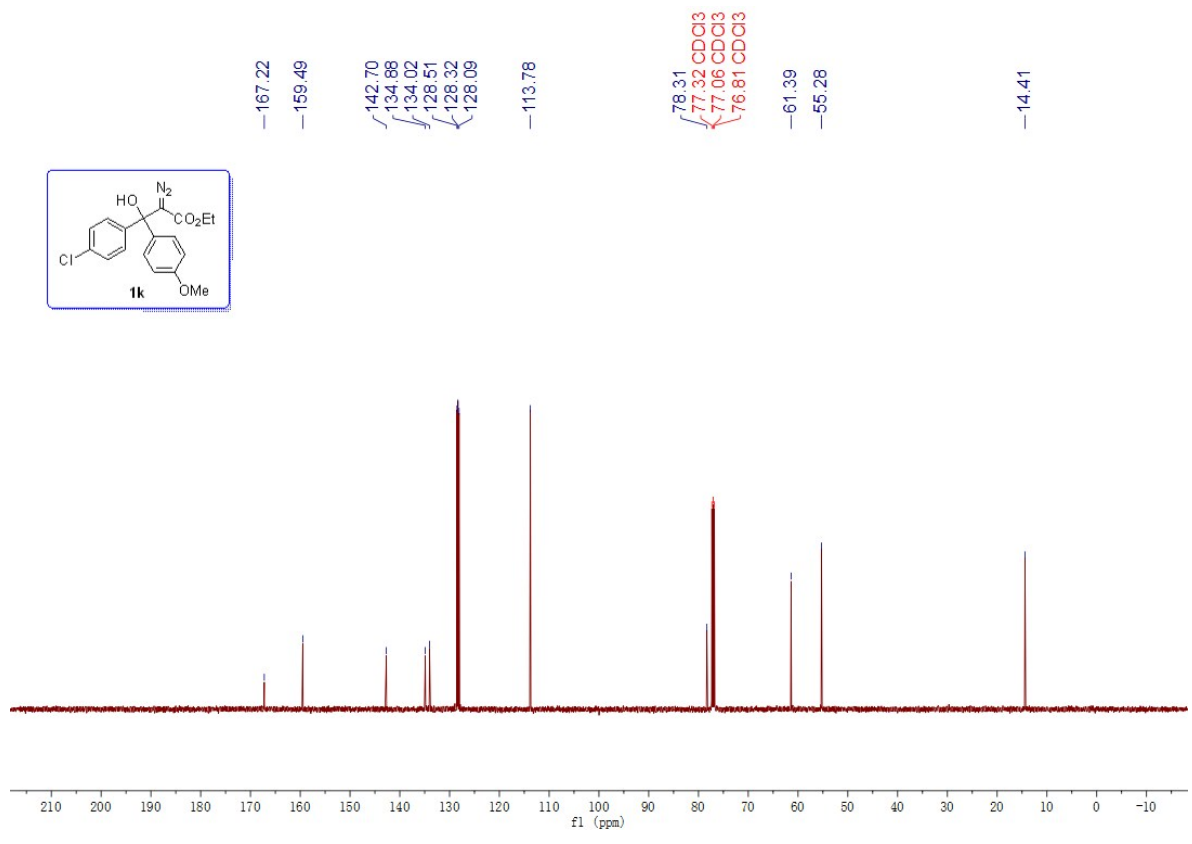

7.67  
7.67  
7.66  
7.66  
7.25  
7.24  
7.24  
7.23  
7.22  
7.22  
7.21  
7.11  
7.10  
7.10  
7.09  
7.09  
4.36  
4.29  
4.28  
4.27  
4.27  
4.26  
4.26  
4.25  
4.25  
4.24  
4.24  
4.23  
4.22  
2.84  
2.83  
2.82  
2.81  
2.79  
2.78  
2.52  
2.51  
2.51  
2.50  
2.49  
2.49  
2.48  
2.10  
2.09  
2.07  
2.07  
2.06  
2.05  
2.04  
1.99  
1.98  
1.96  
1.97  
1.97  
1.30  
1.28  
1.27

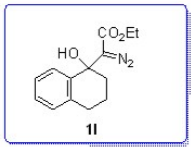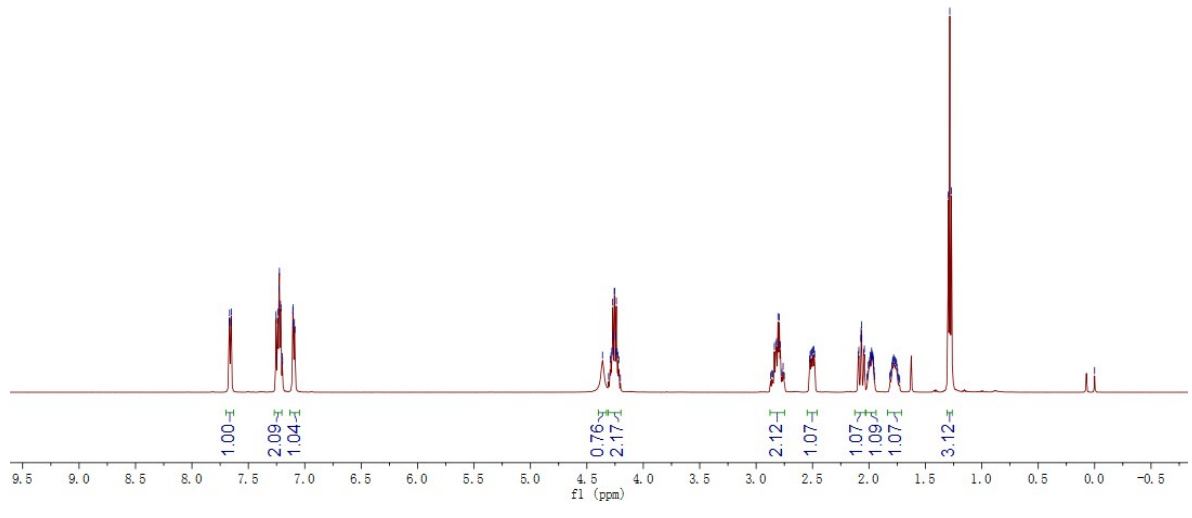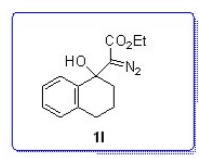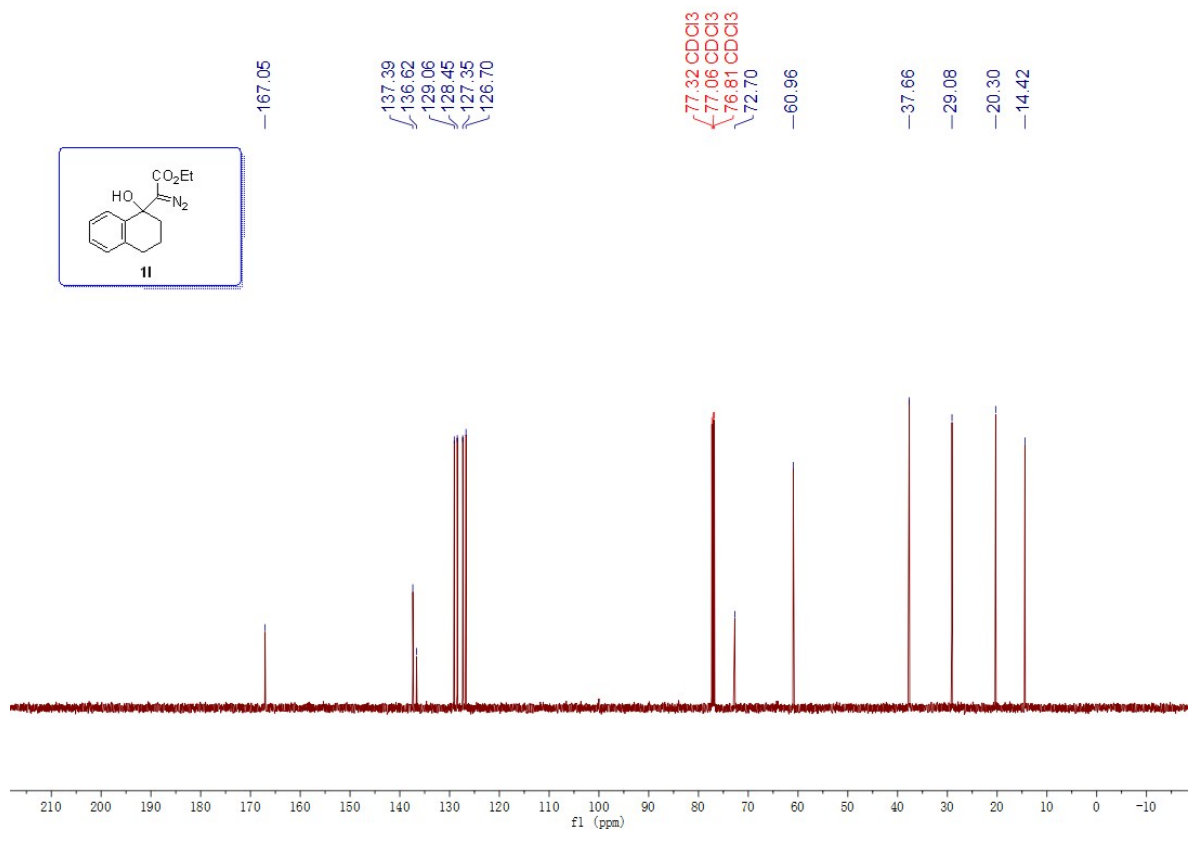

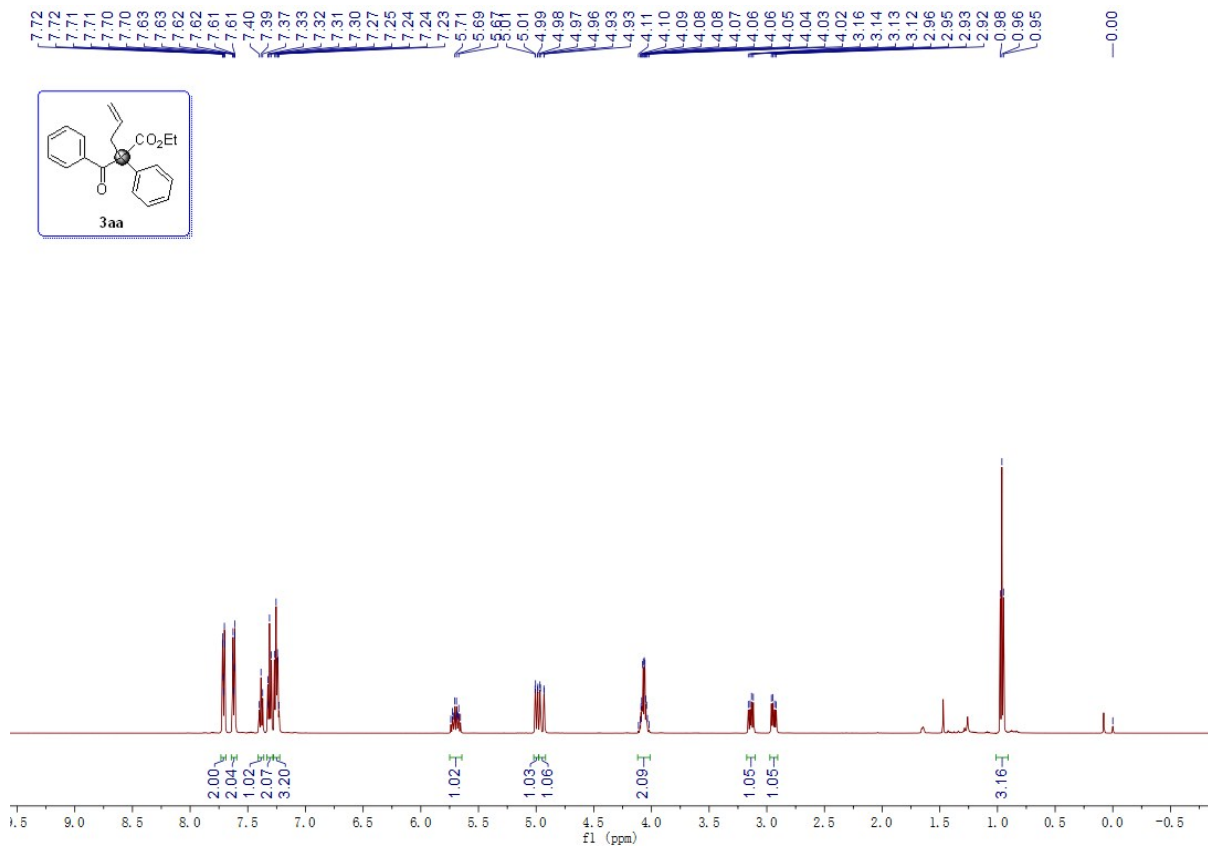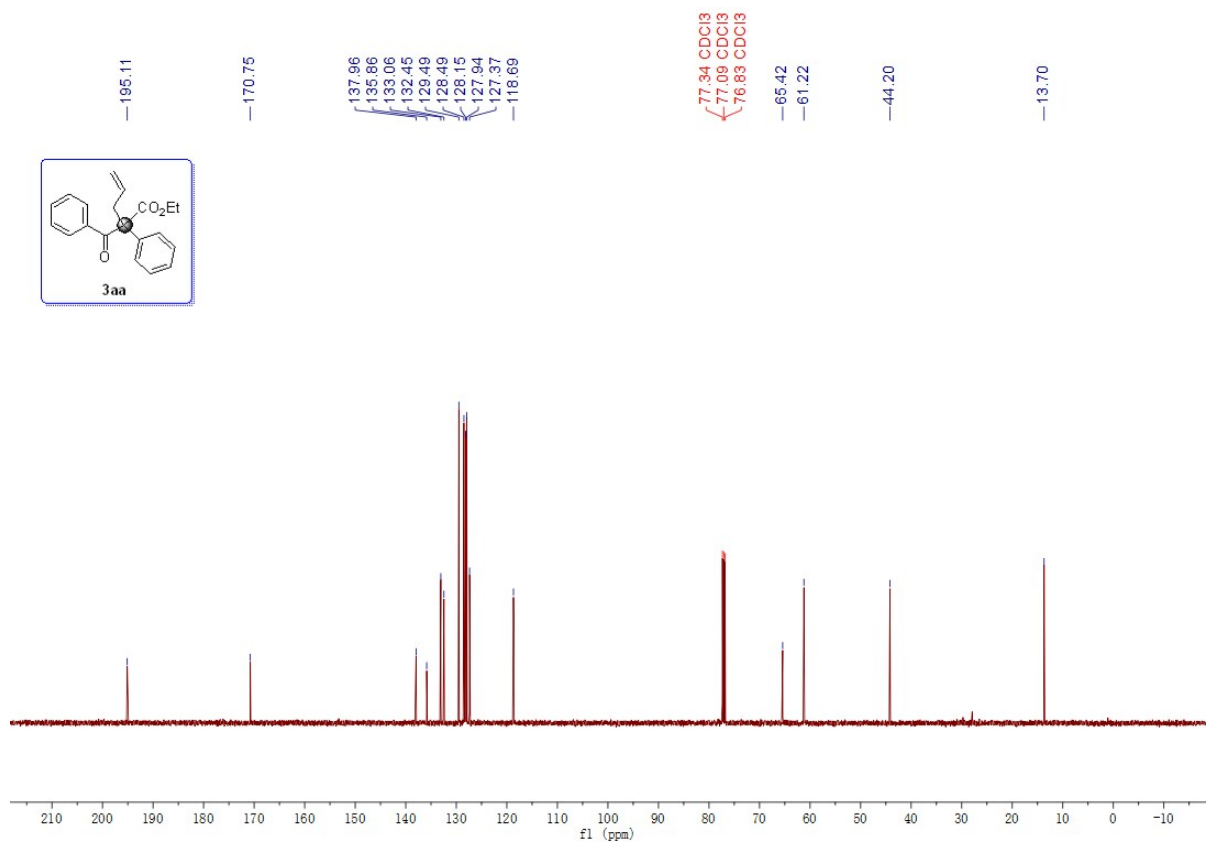

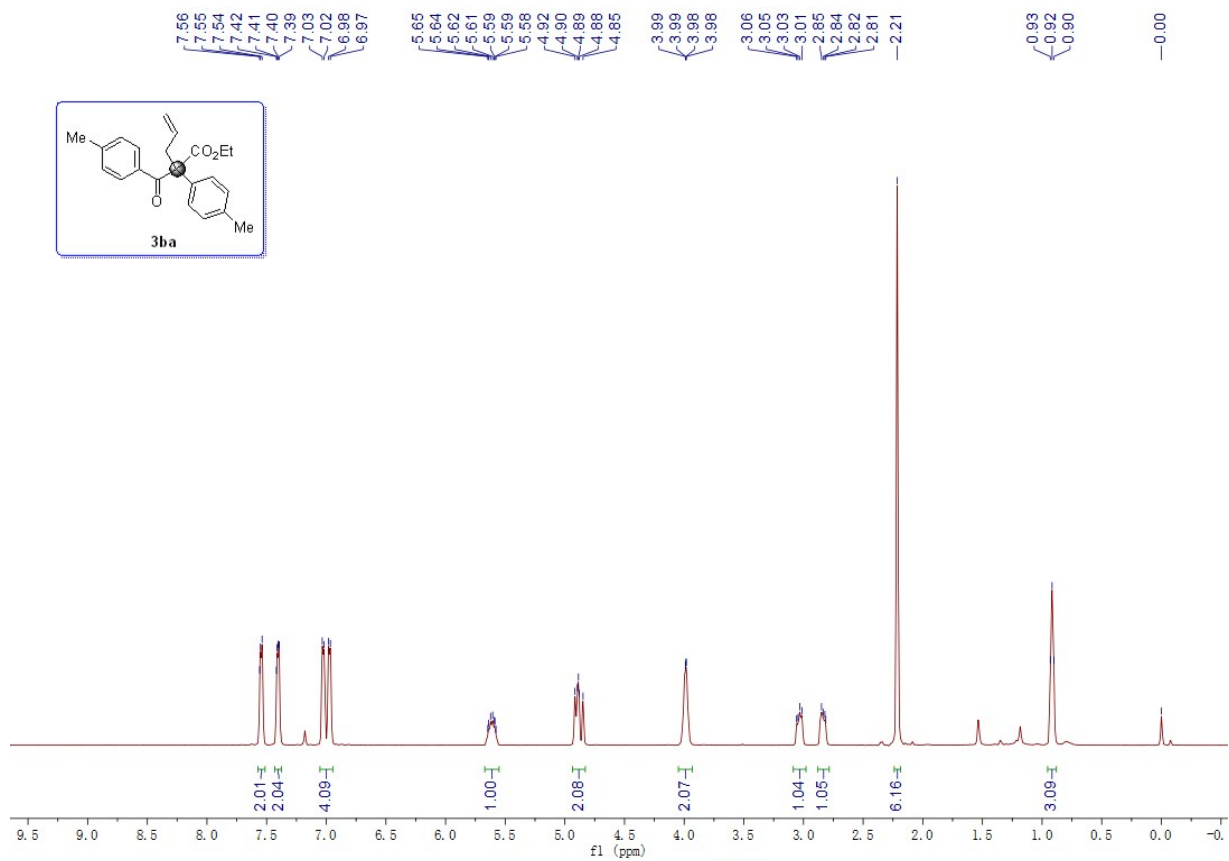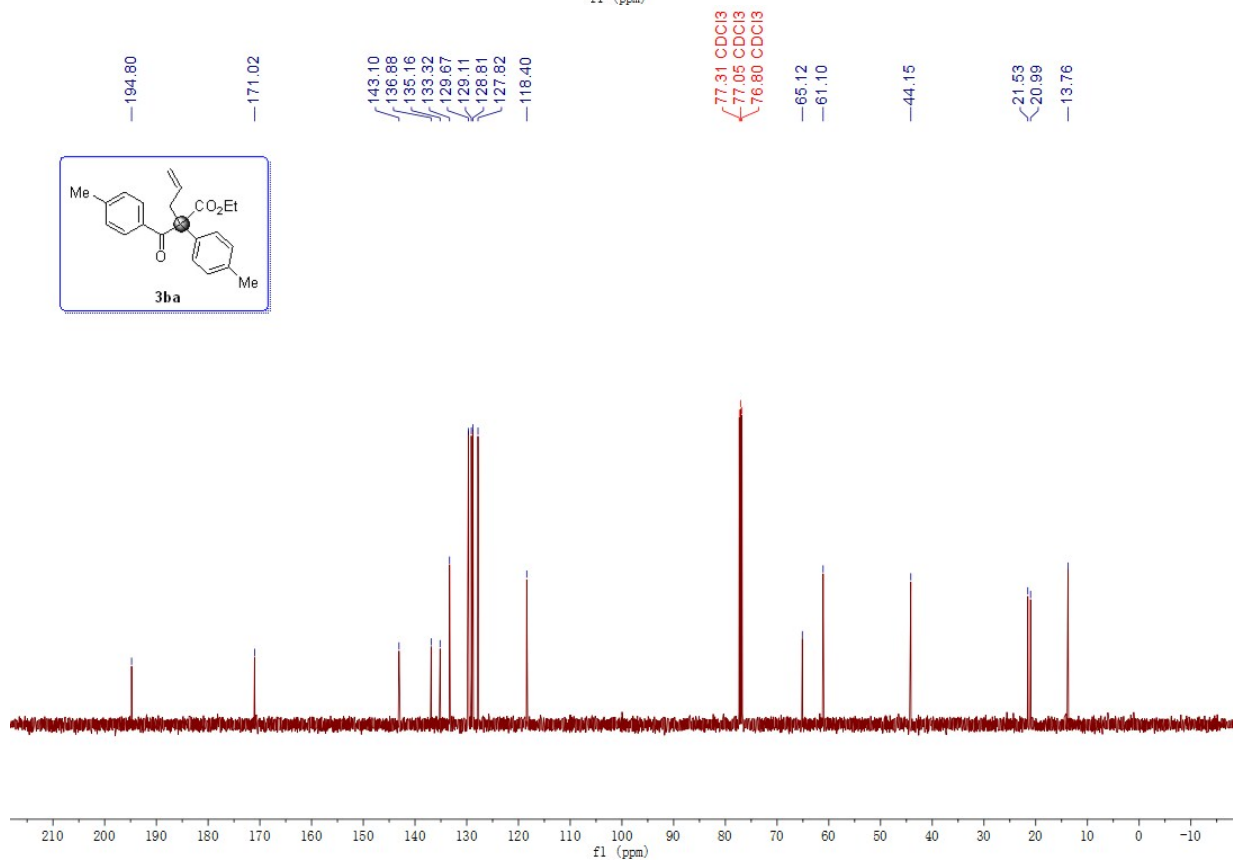

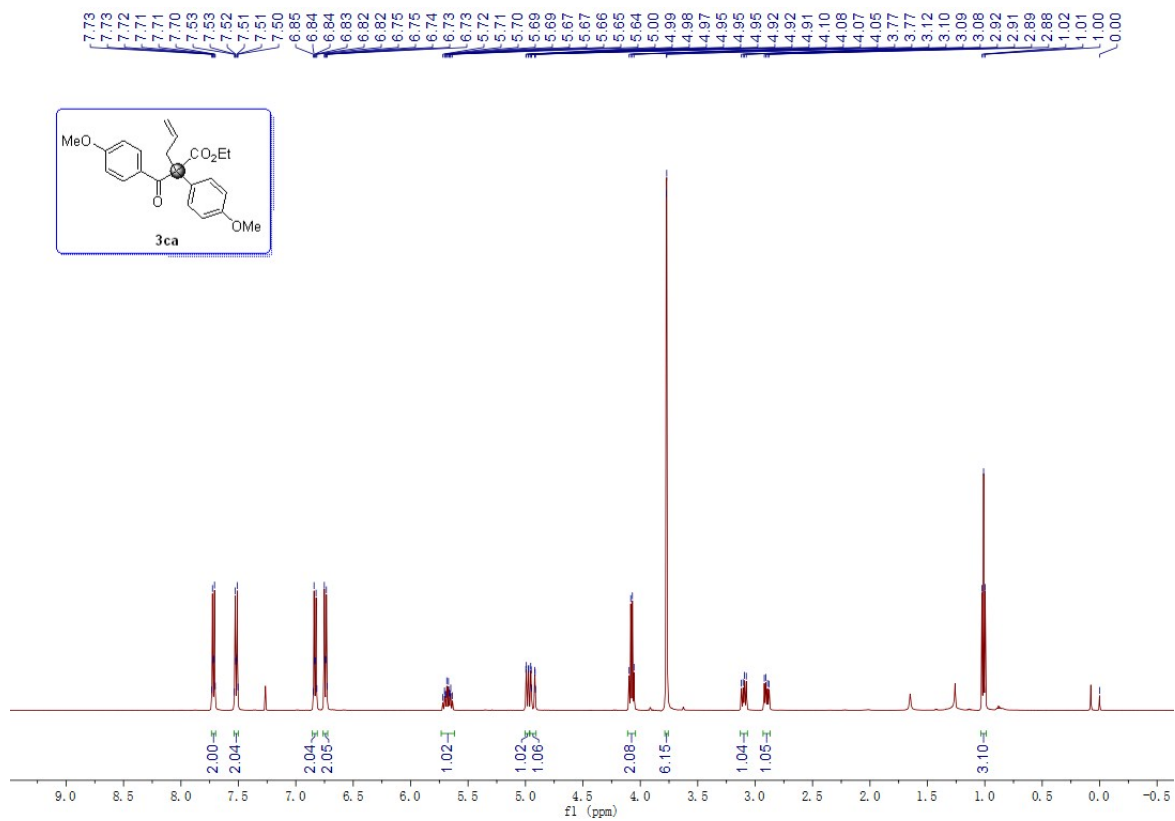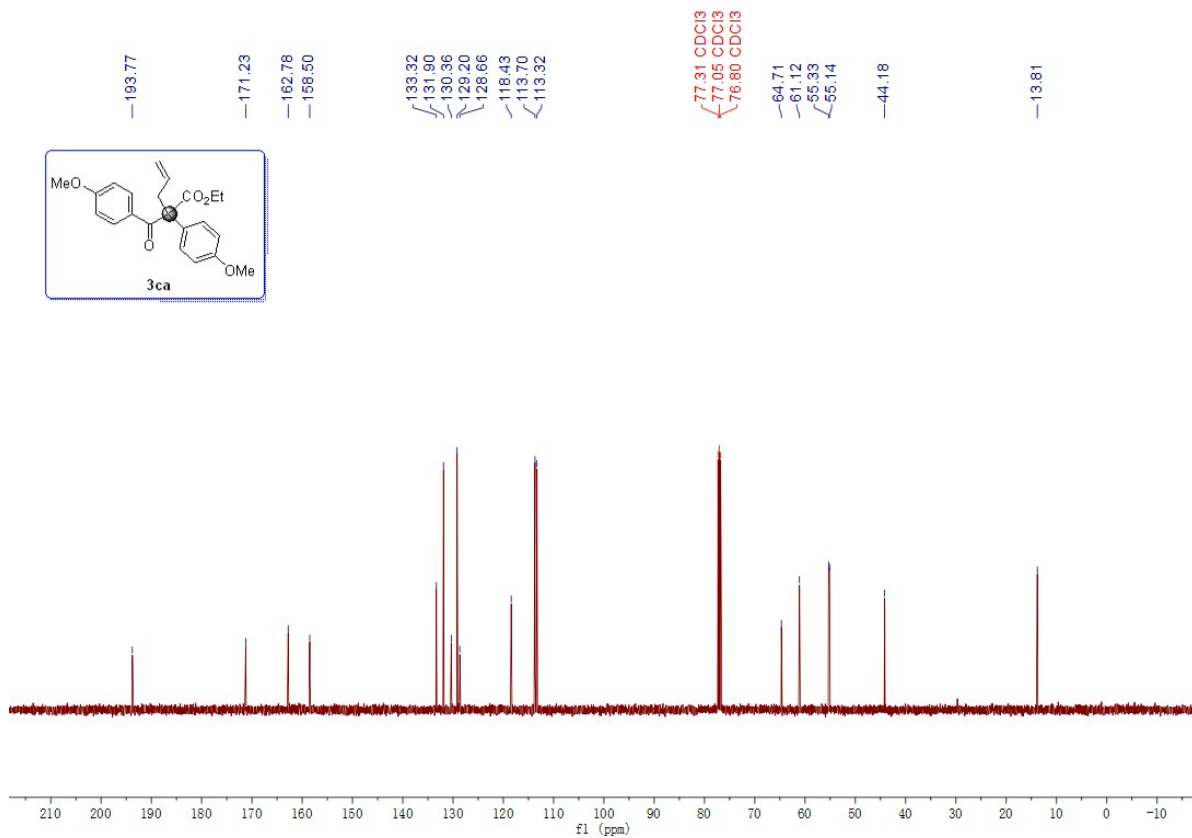

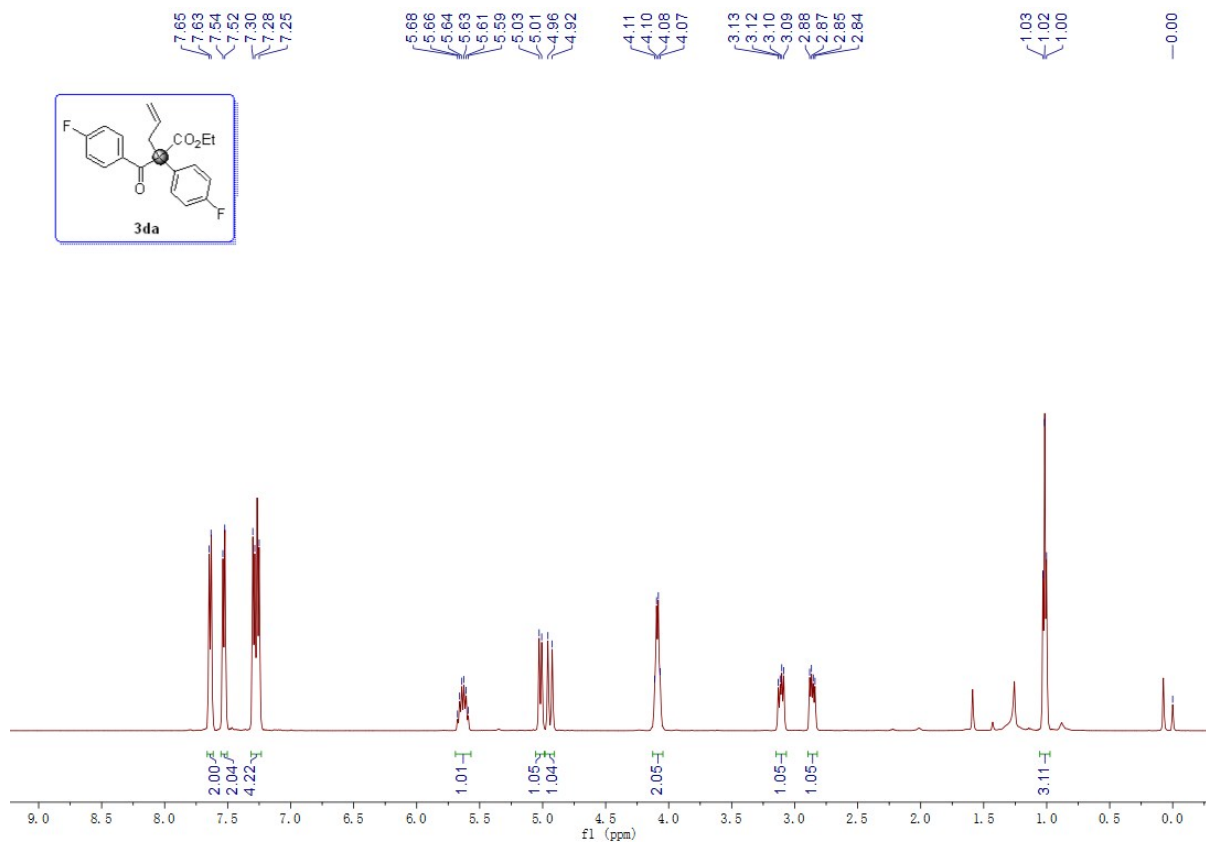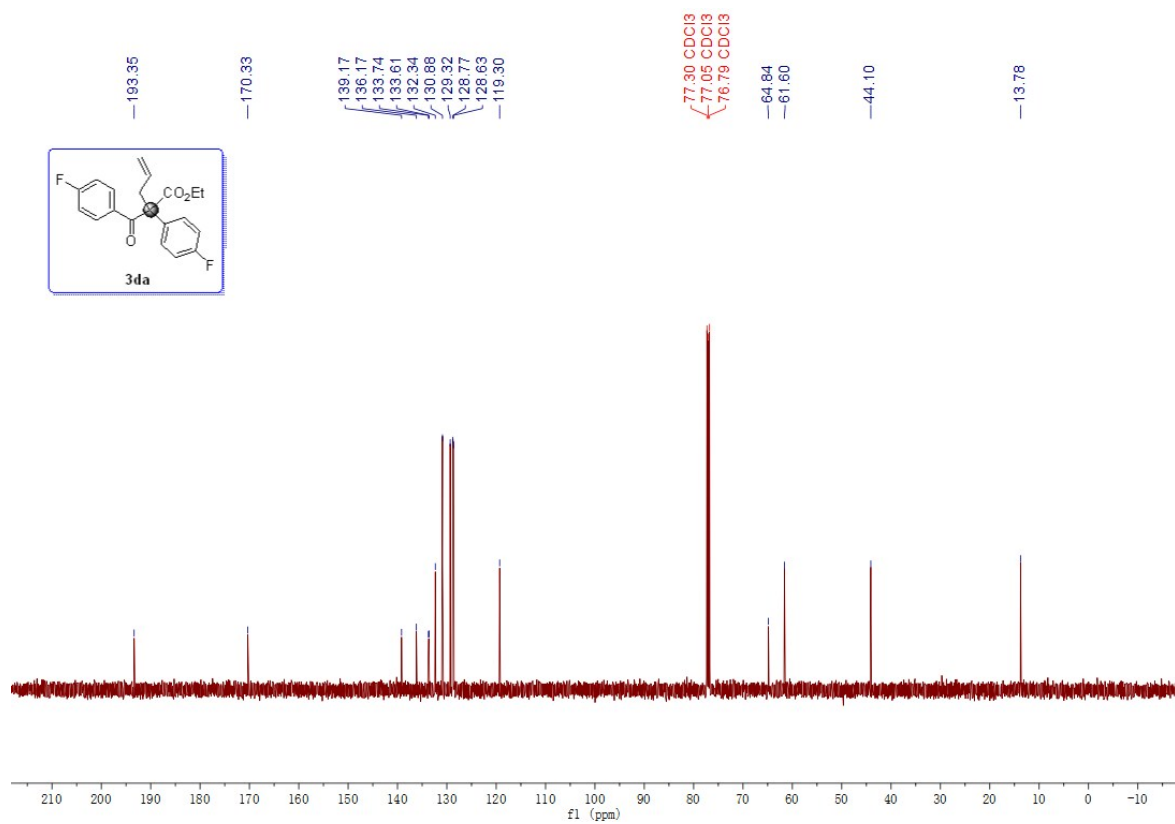



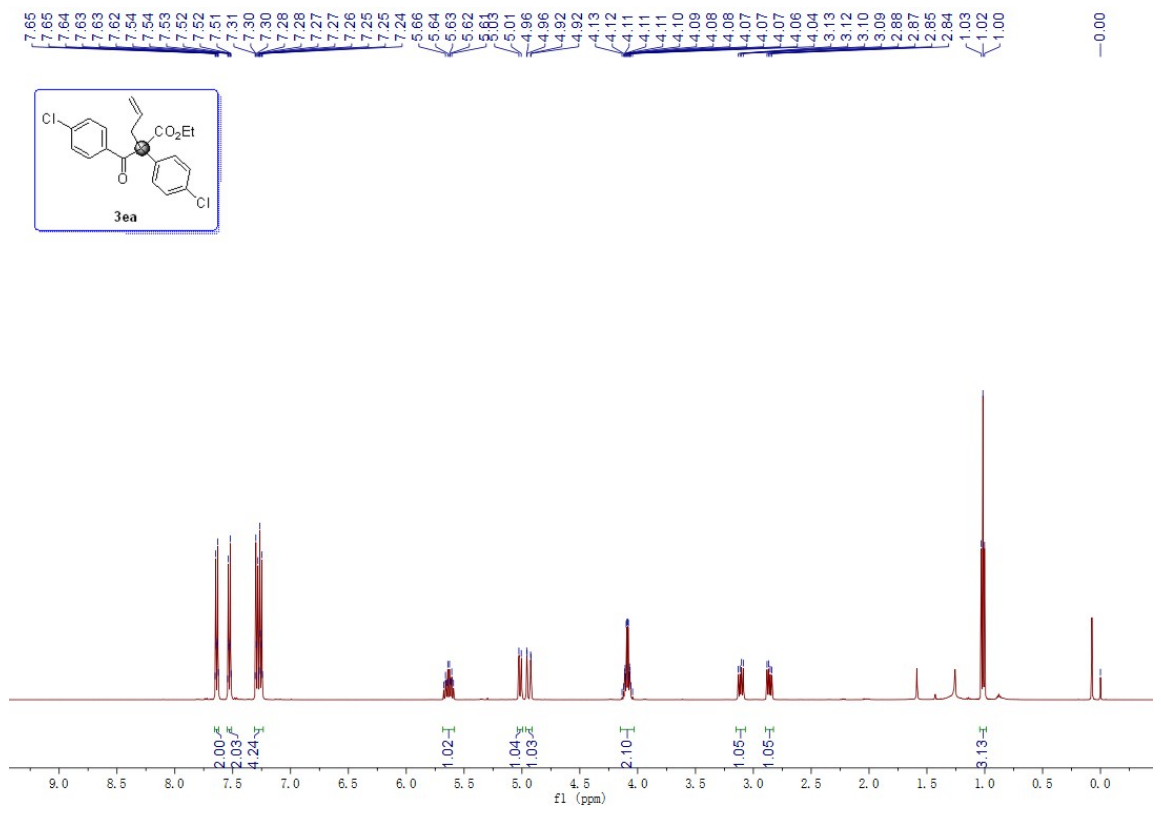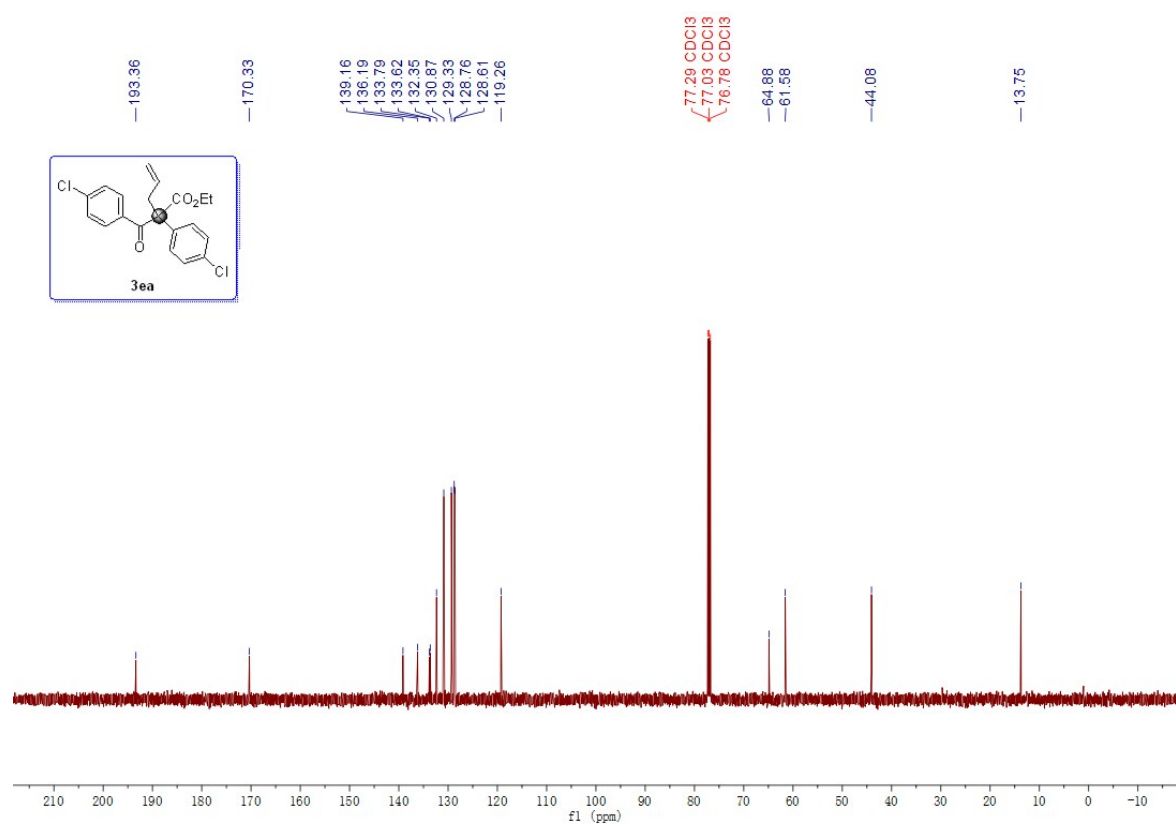

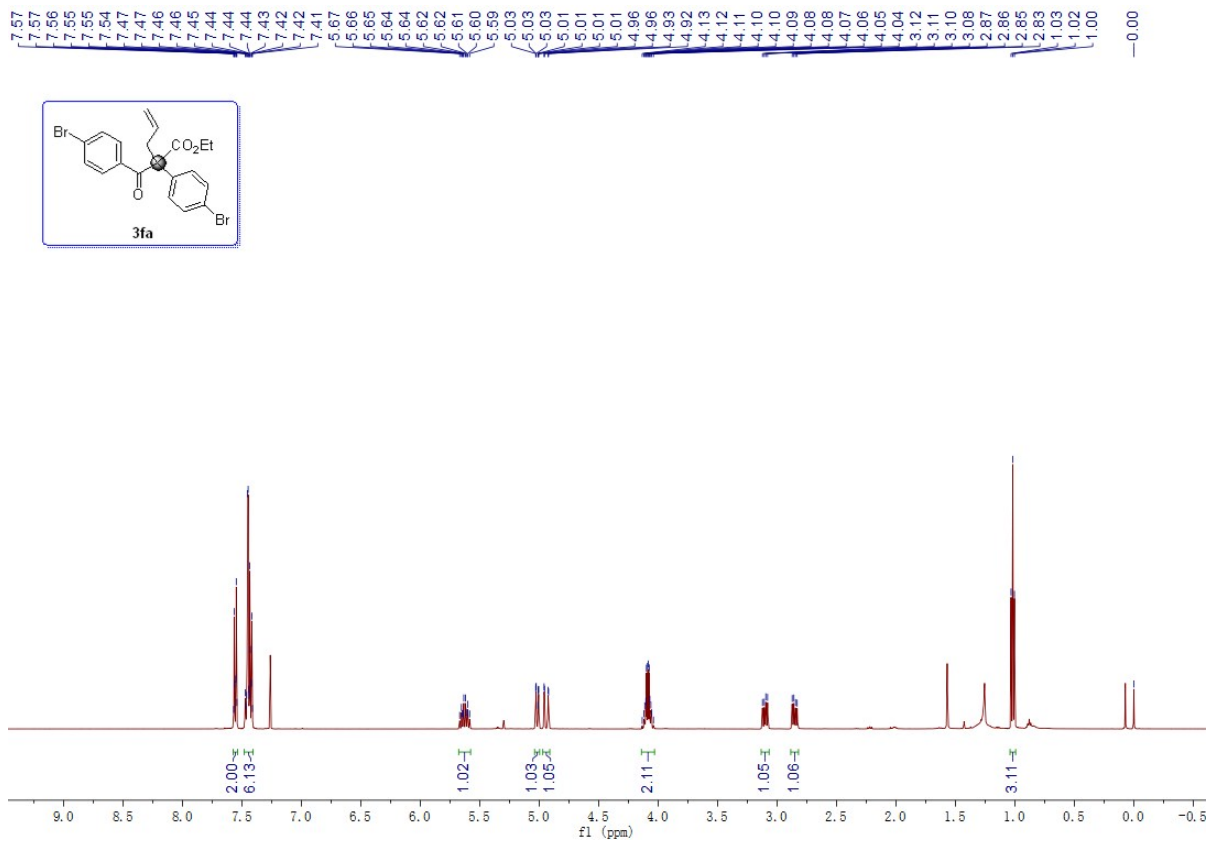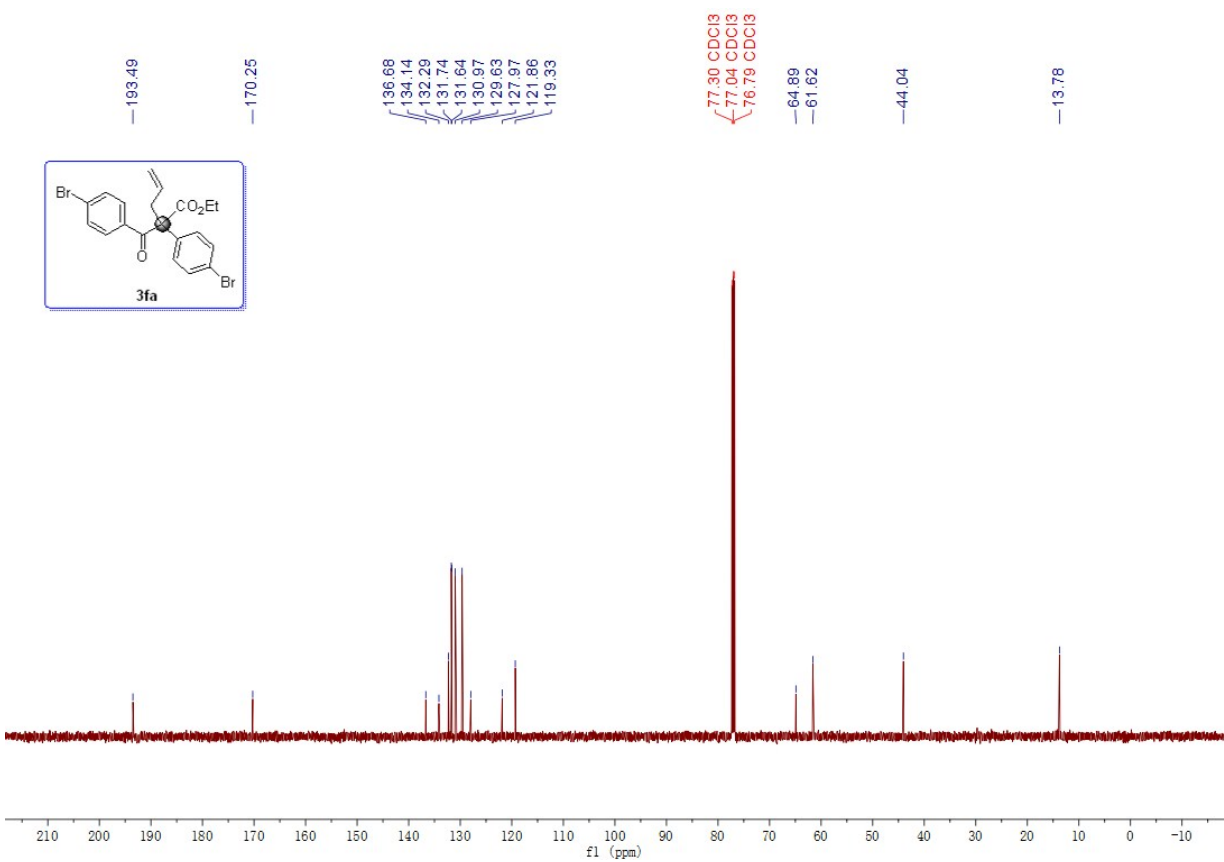

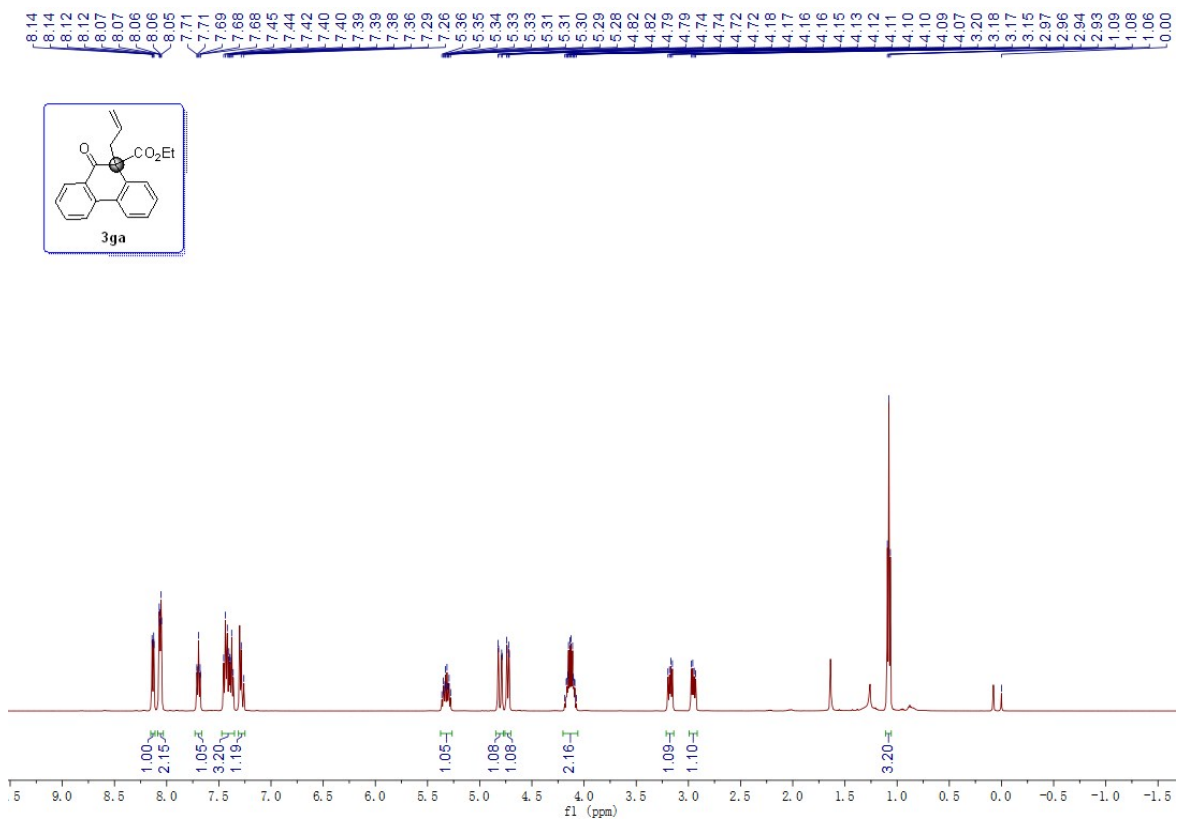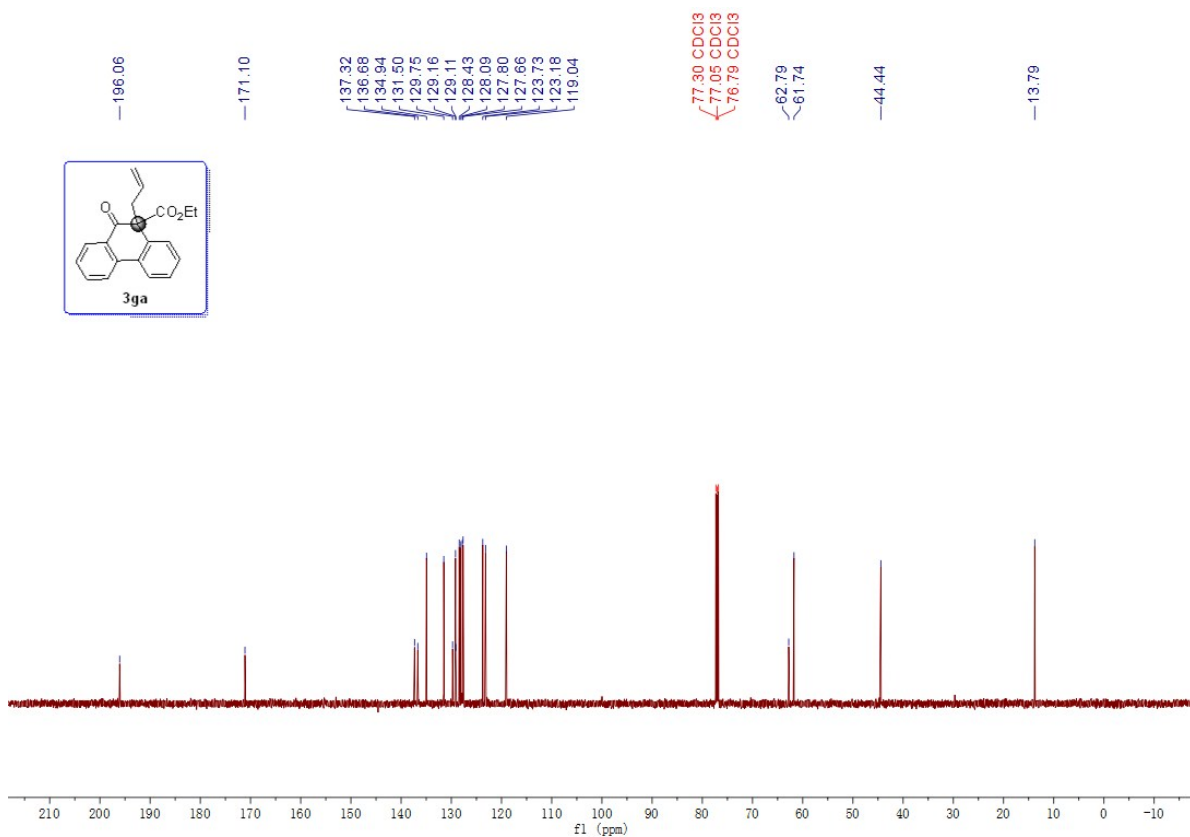

5.77  
5.76  
5.75  
5.74  
5.73  
5.72  
5.05  
5.05  
5.04  
5.03  
5.02  
5.02  
4.21  
4.19  
4.18  
4.17  
2.63  
2.62  
2.60  
2.59  
2.50  
2.49  
2.49  
2.47  
2.46  
2.46  
2.45  
2.44  
2.36  
2.34  
2.33  
2.32  
2.03  
2.03  
2.02  
2.02  
2.01  
2.01  
2.00  
2.00  
1.76  
1.76  
1.75  
1.74  
1.72  
1.71  
1.71  
1.69  
1.69  
1.66  
1.66  
1.65  
1.65  
1.64  
1.64  
1.63  
1.63  
1.50  
1.49  
1.49  
1.47  
1.47  
1.46  
1.46  
1.44  
1.44  
1.27  
1.25  
1.24  
1.24  
0.00

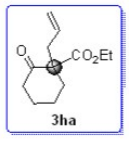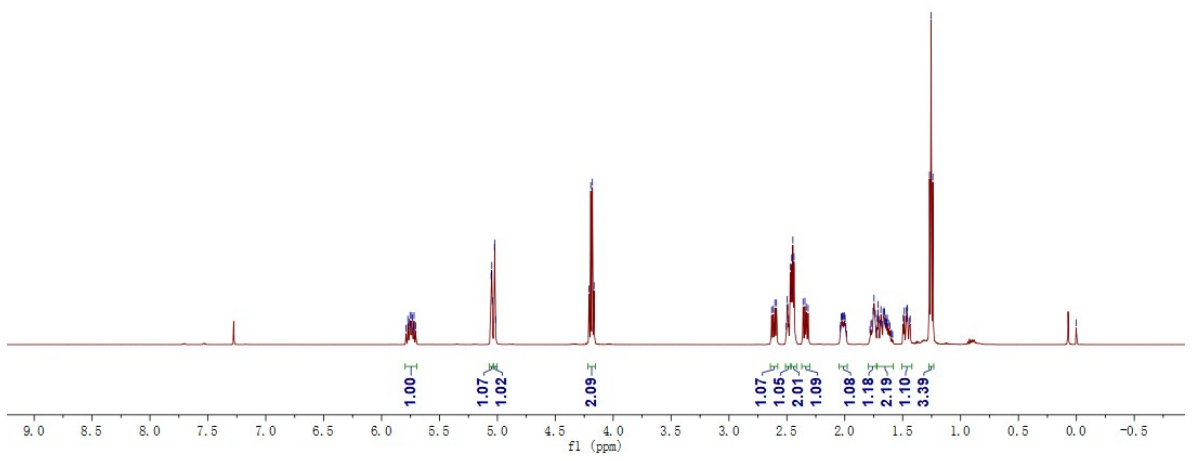

— 207.49  
— 171.46  
— 133.34  
— 118.24  
77.30 CDCl<sub>3</sub>  
77.05 CDCl<sub>3</sub>  
76.79 CDCl<sub>3</sub>  
61.21  
60.87  
41.13  
39.32  
35.78  
27.54  
22.48  
14.19

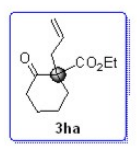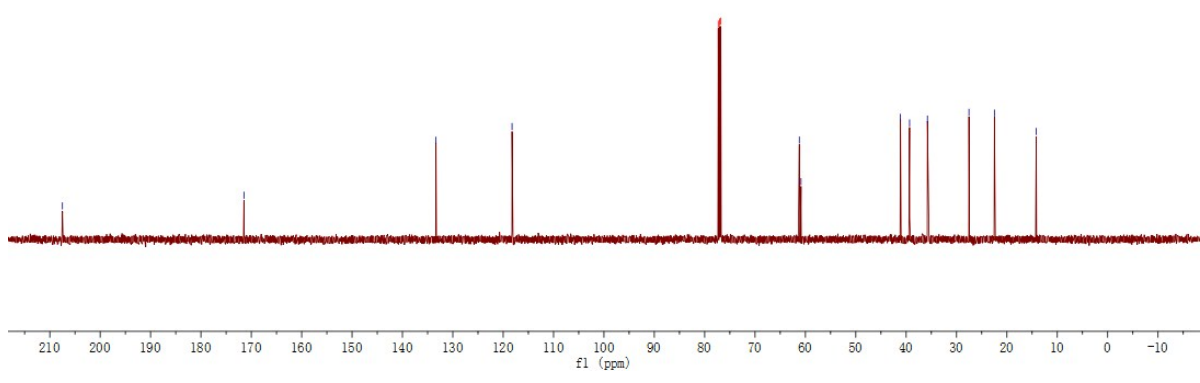



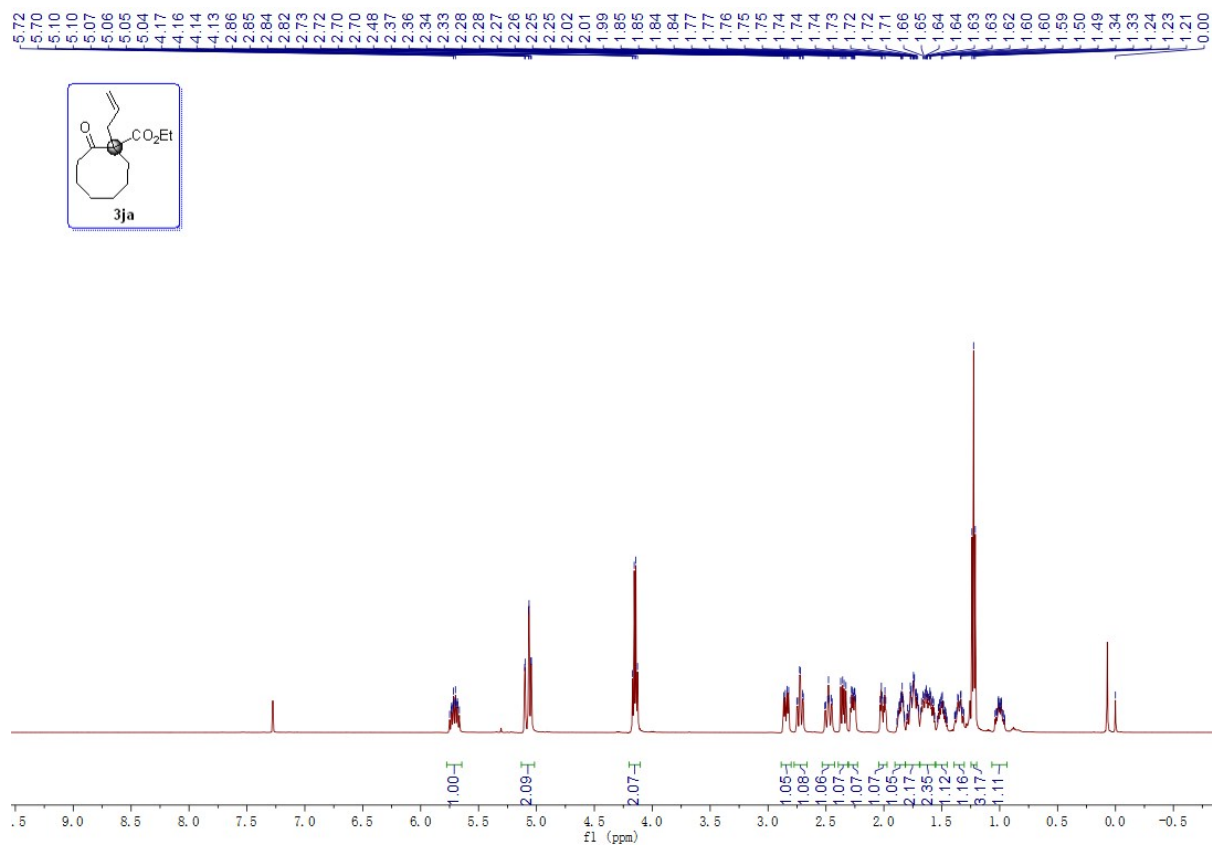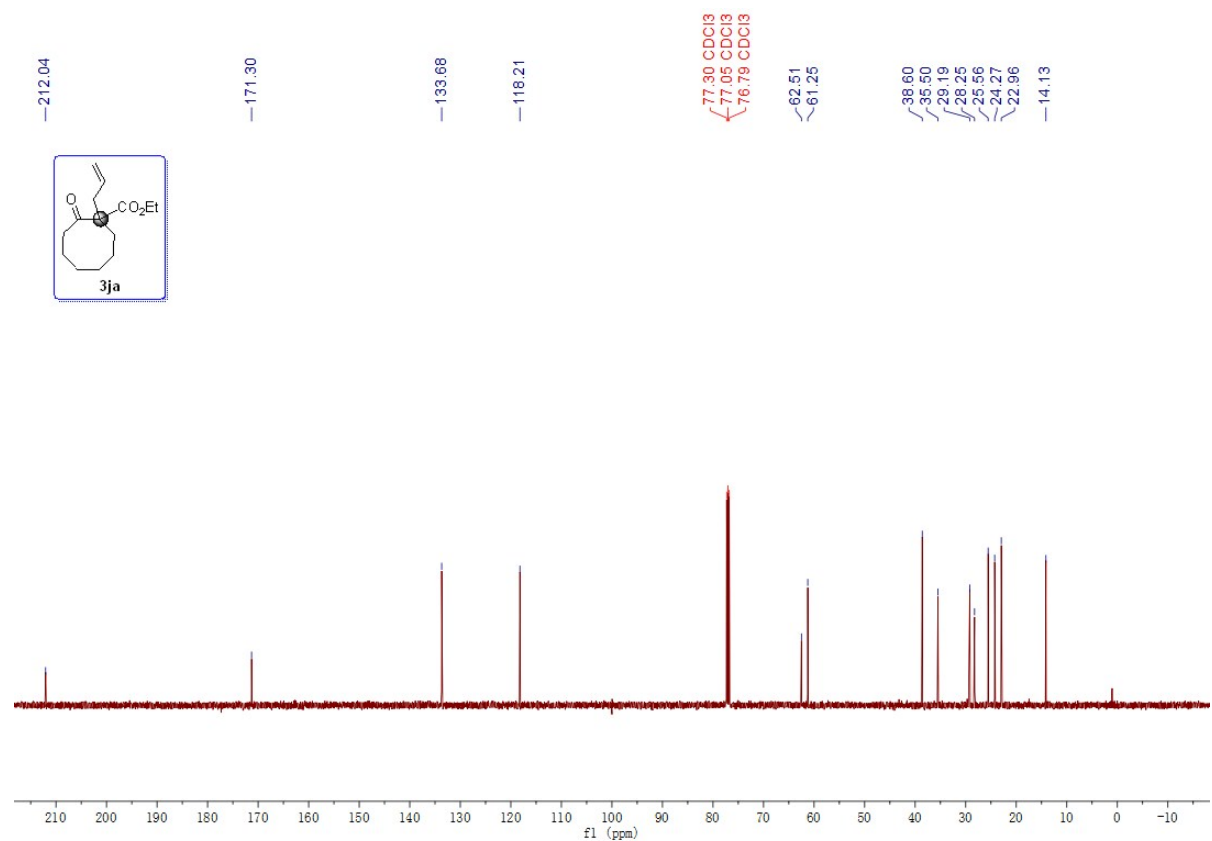

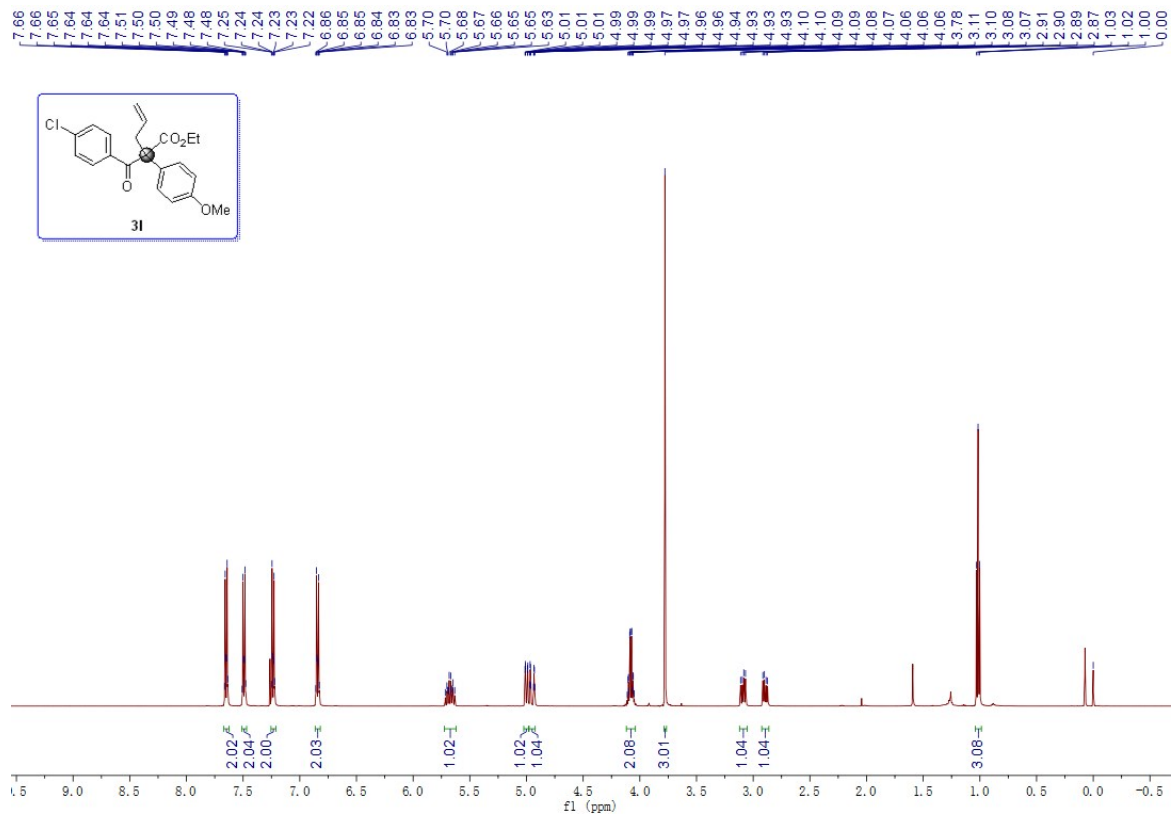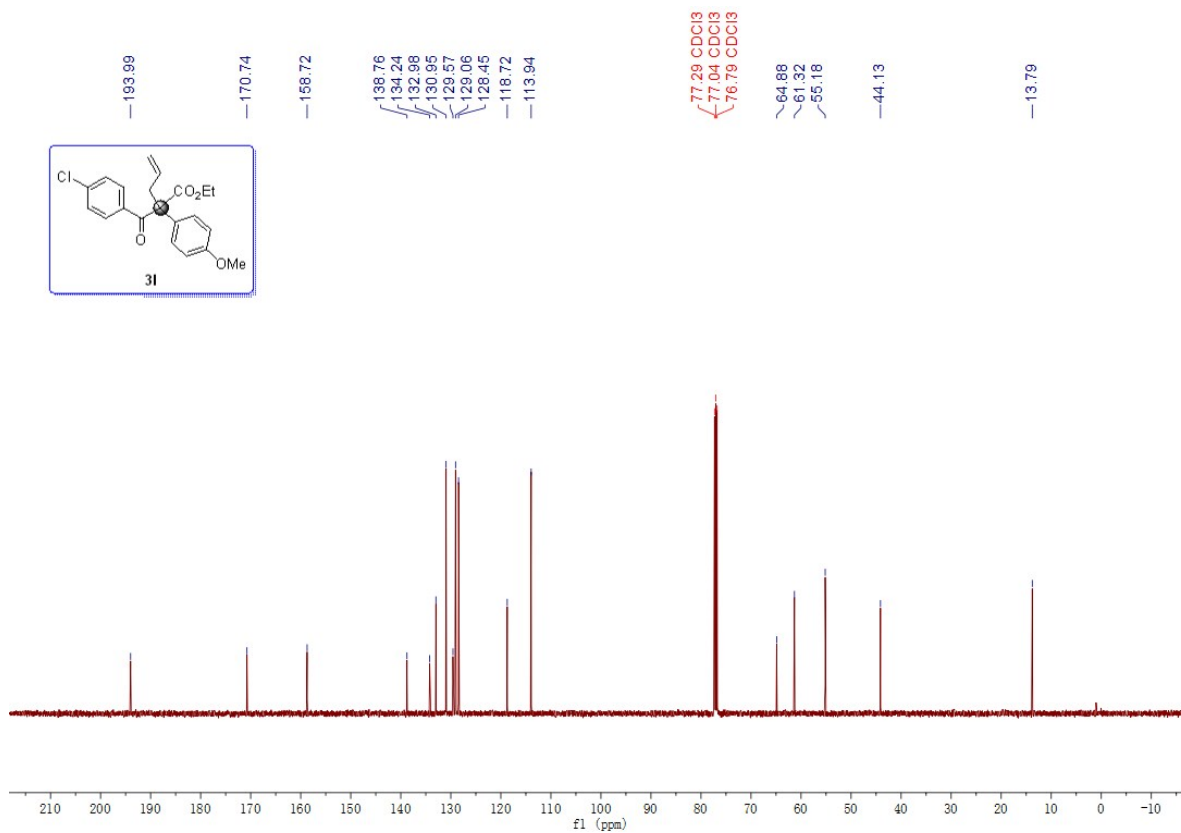

7.71  
7.70  
7.70  
7.69  
7.69  
7.69  
7.68  
7.56  
7.56  
7.55  
7.54  
7.29  
7.28  
7.27  
7.27  
6.77  
6.77  
6.76  
6.75  
6.75  
6.74  
6.74  
5.66  
5.65  
5.64  
5.63  
5.62  
5.61  
5.01  
5.01  
5.01  
4.99  
4.99  
4.99  
4.95  
4.95  
4.94  
4.92  
4.91  
4.91  
4.91  
4.11  
4.11  
4.10  
4.09  
4.08  
4.08  
4.07  
4.07  
4.06  
4.06  
3.79  
3.79  
3.14  
3.12  
3.11  
3.09  
2.88  
2.86  
2.85  
2.84  
1.03  
1.01  
1.00  
0.00

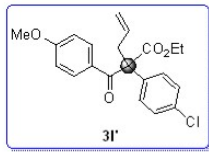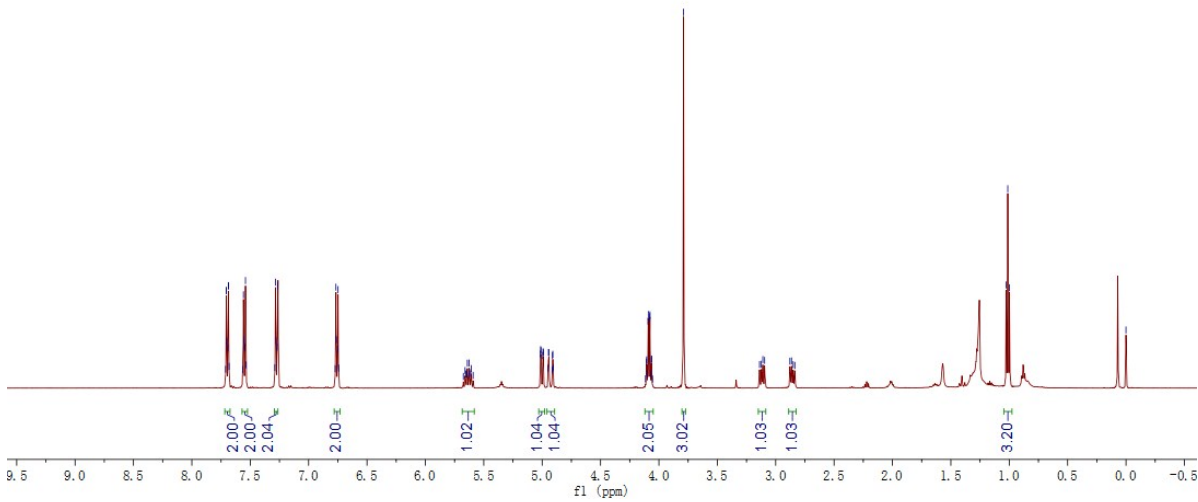

193.09  
170.82  
163.02  
136.91  
133.24  
132.68  
131.89  
129.50  
128.52  
128.16  
119.00  
113.48  
77.29 CDCl<sub>3</sub>  
77.03 CDCl<sub>3</sub>  
76.78 CDCl<sub>3</sub>  
64.69  
61.39  
55.39  
44.14  
13.80

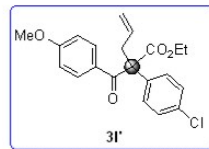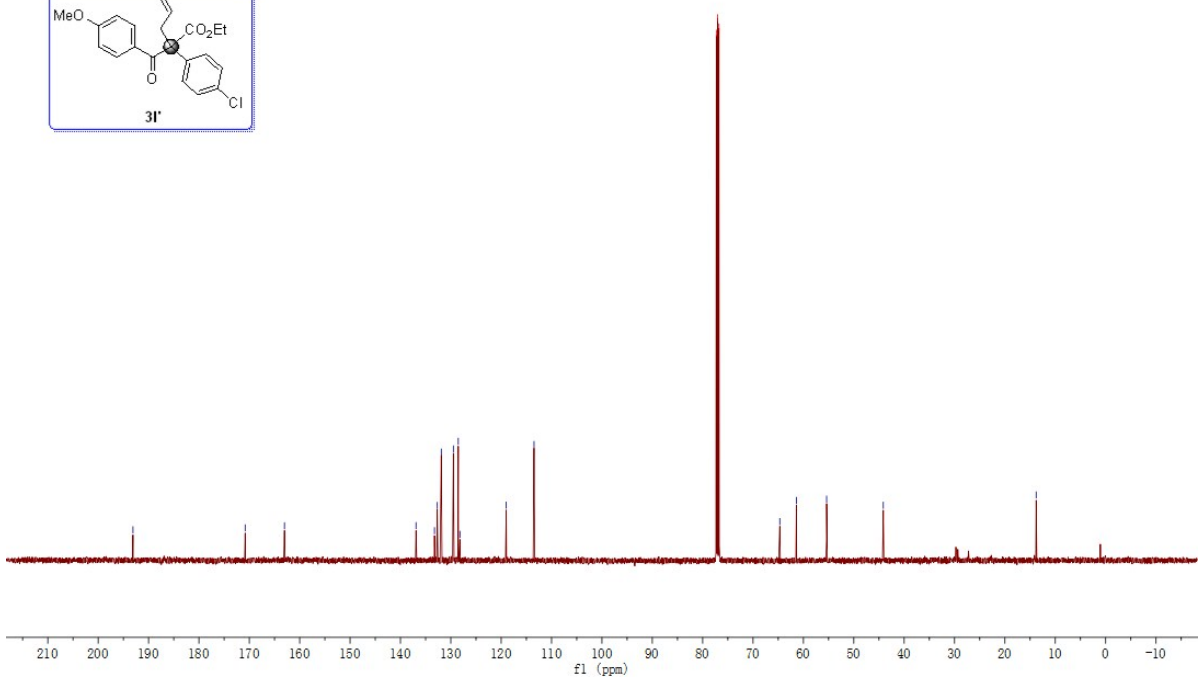



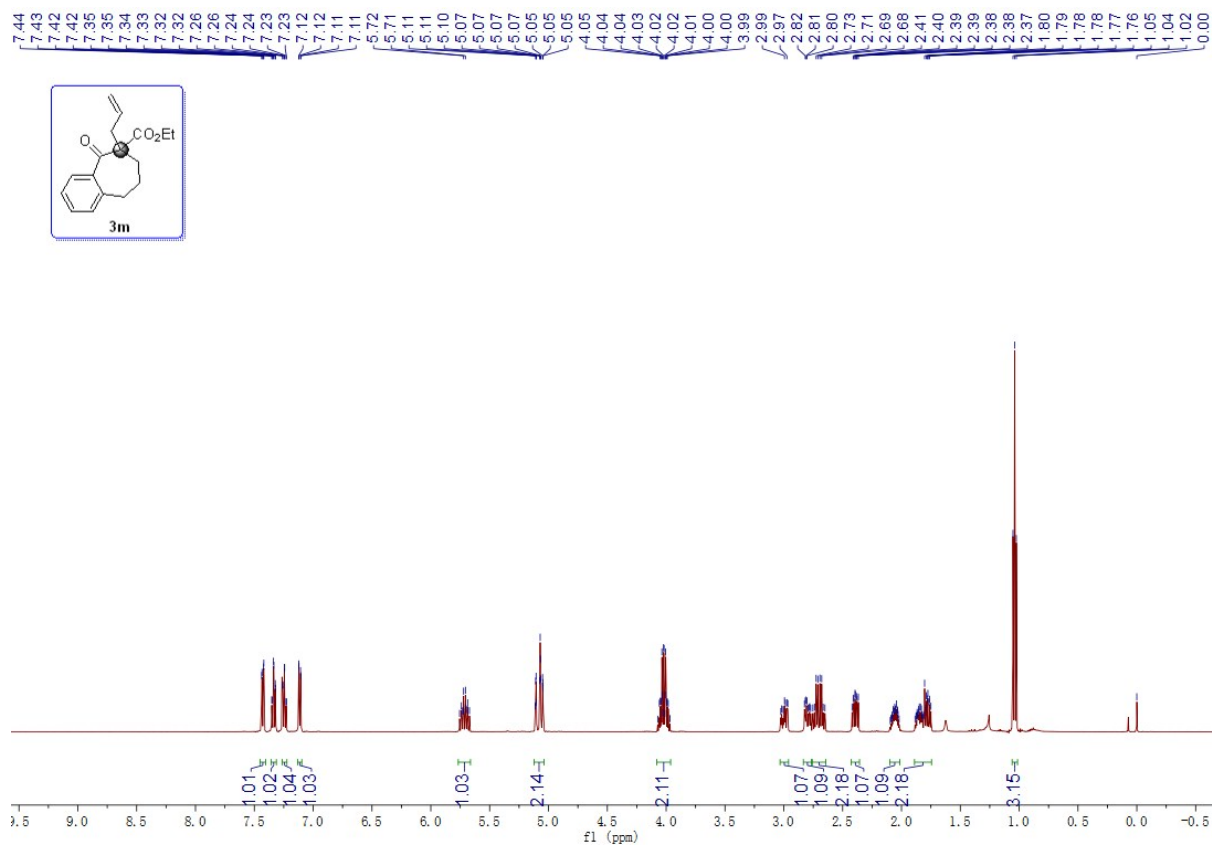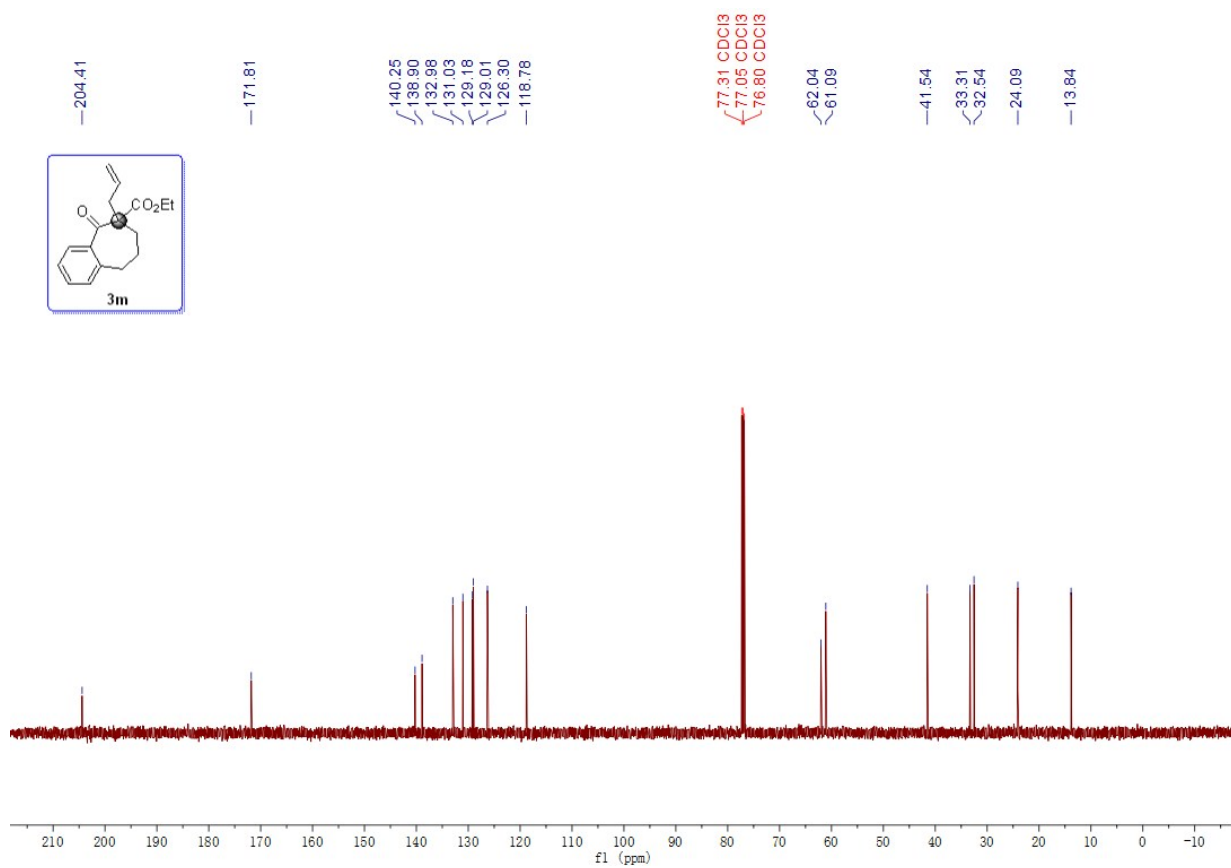

7.25  
7.25  
7.24  
7.18  
7.17  
7.16  
7.15  
5.70  
5.68  
5.67  
5.66  
5.65  
5.63  
4.93  
4.90  
4.22  
4.21  
4.21  
4.20  
4.19  
4.19  
4.18  
4.17  
4.17  
4.16  
4.15  
4.14  
4.14  
3.06  
3.05  
3.03  
3.02  
2.96  
2.94  
2.94  
2.93  
2.93  
2.92  
2.91  
2.89  
2.88  
2.78  
2.77  
2.76  
2.75  
2.74  
2.73  
2.72  
2.52  
2.51  
2.50  
2.49  
2.48  
2.48  
2.47  
2.07  
2.06  
2.04  
2.03  
2.01  
2.00  
1.21  
1.18  
0.00

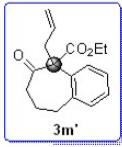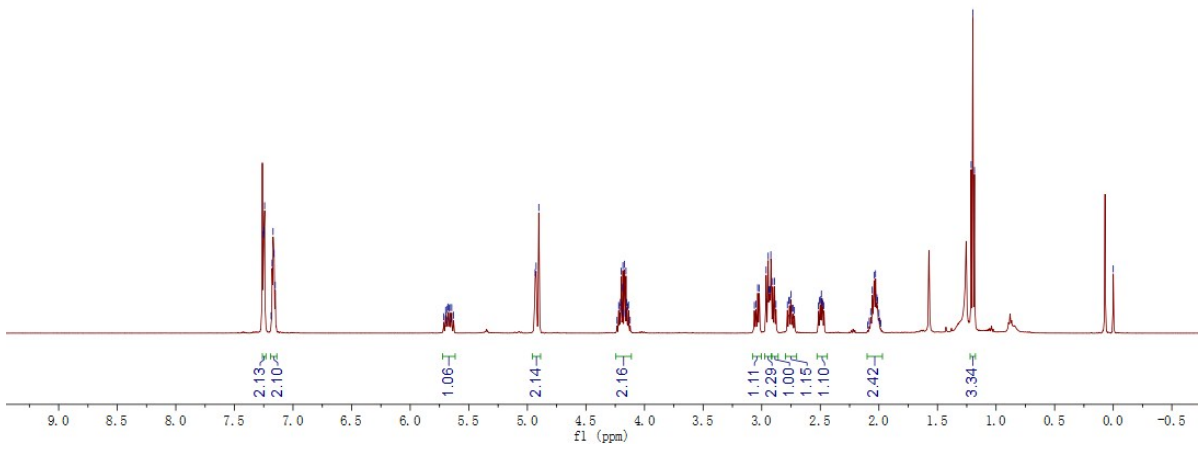

-209.40

-170.61

139.11  
136.63  
133.62  
130.57  
128.09  
128.08  
126.85  
118.42

77.29 CDCl3  
77.04 CDCl3  
76.78 CDCl3  
69.82

-61.78

39.19  
36.76  
31.84  
26.63

-13.89

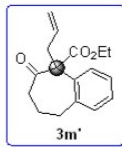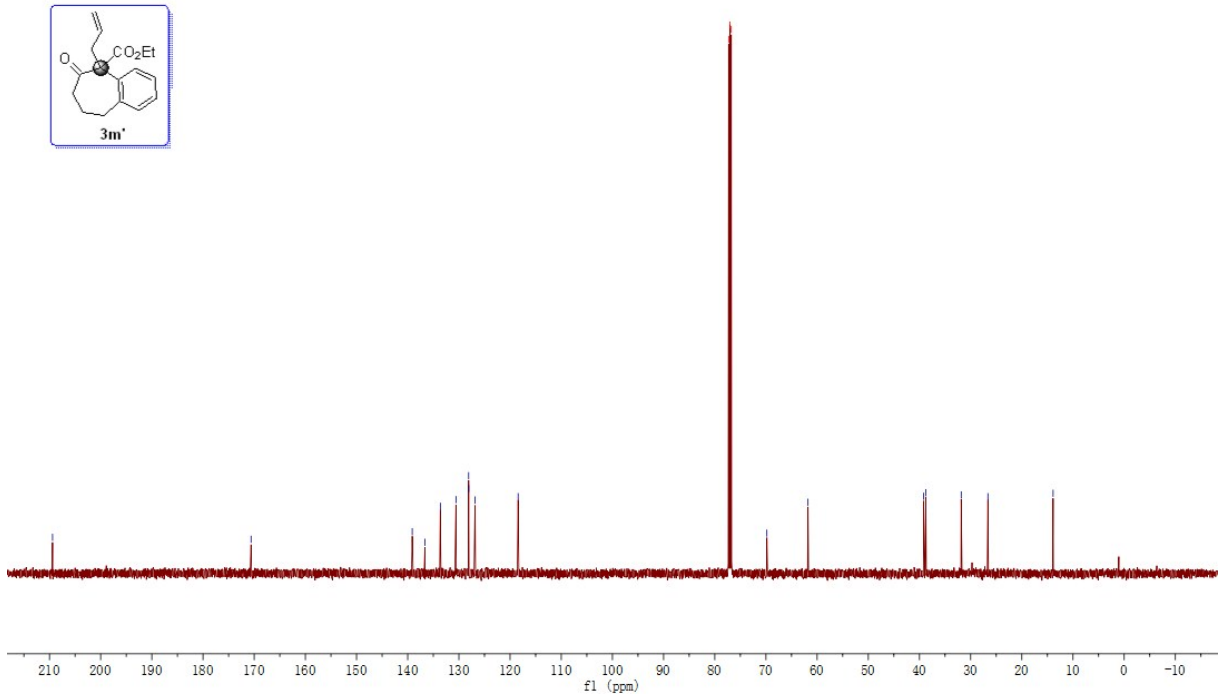

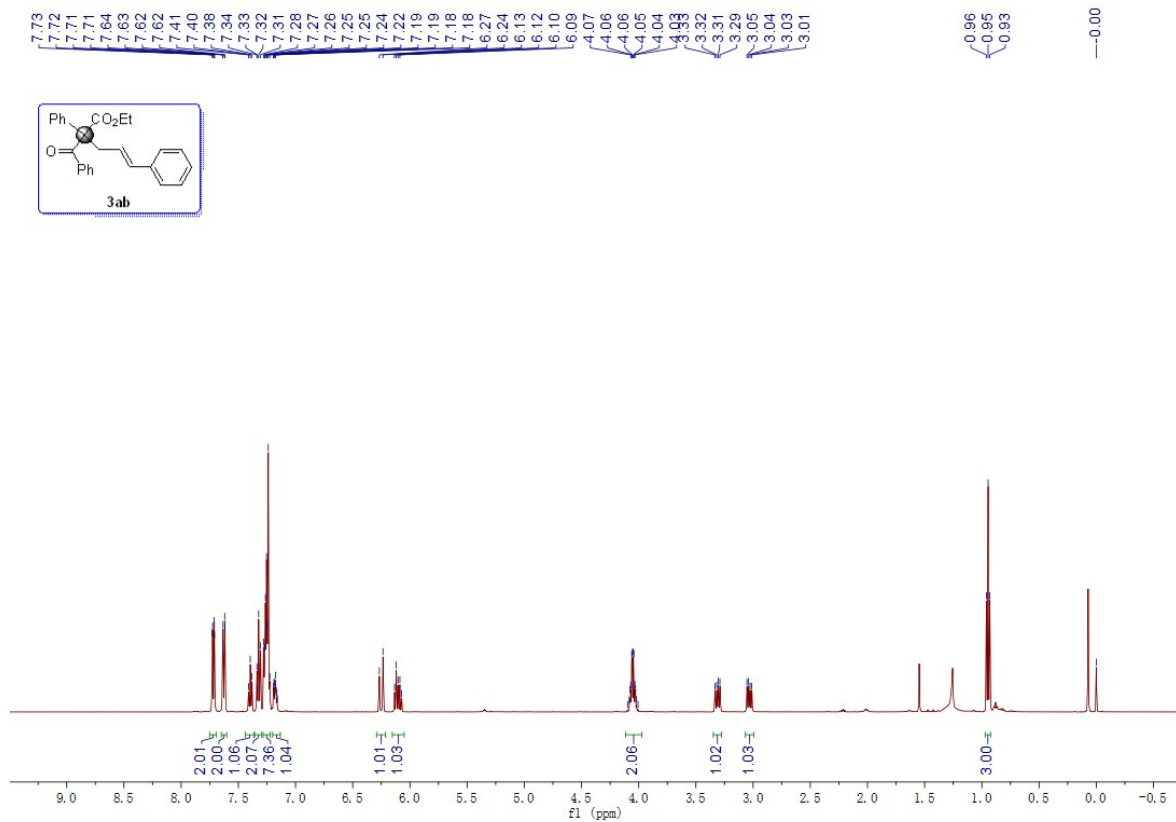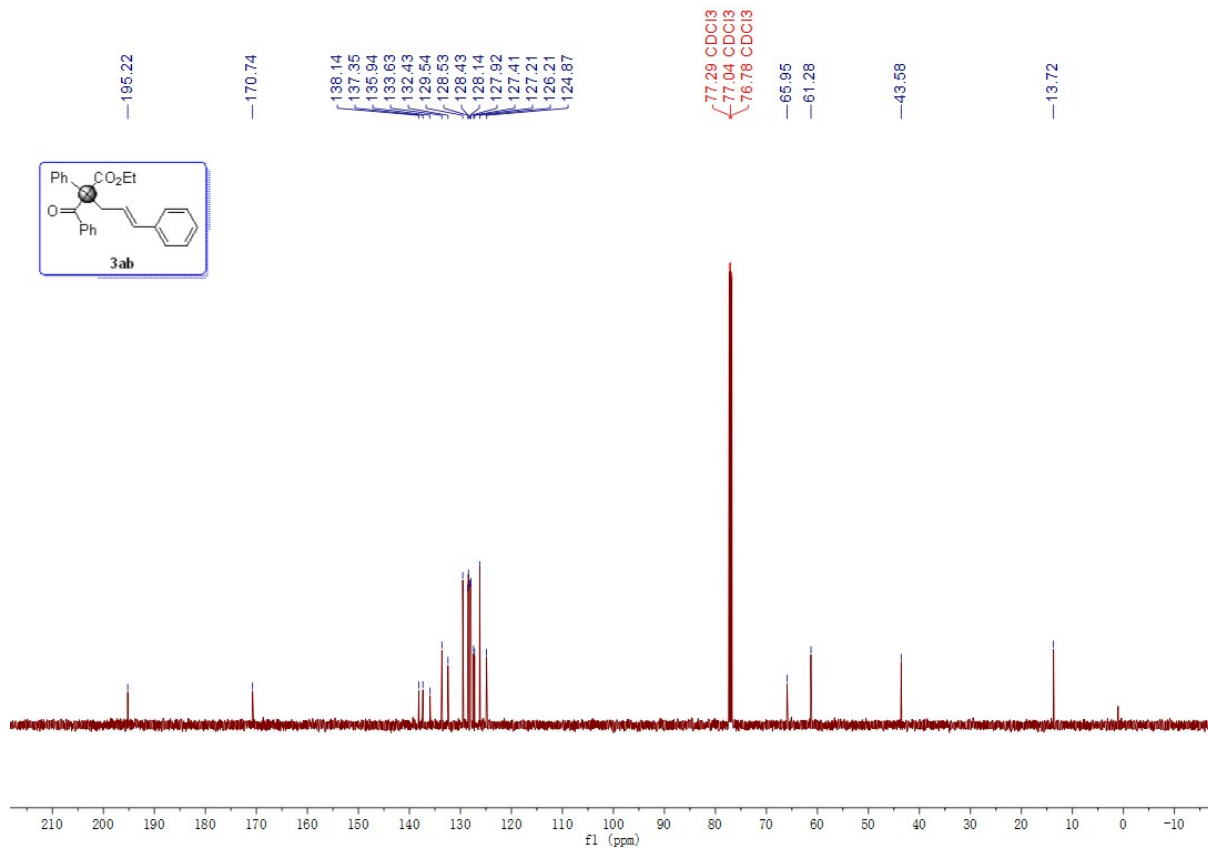

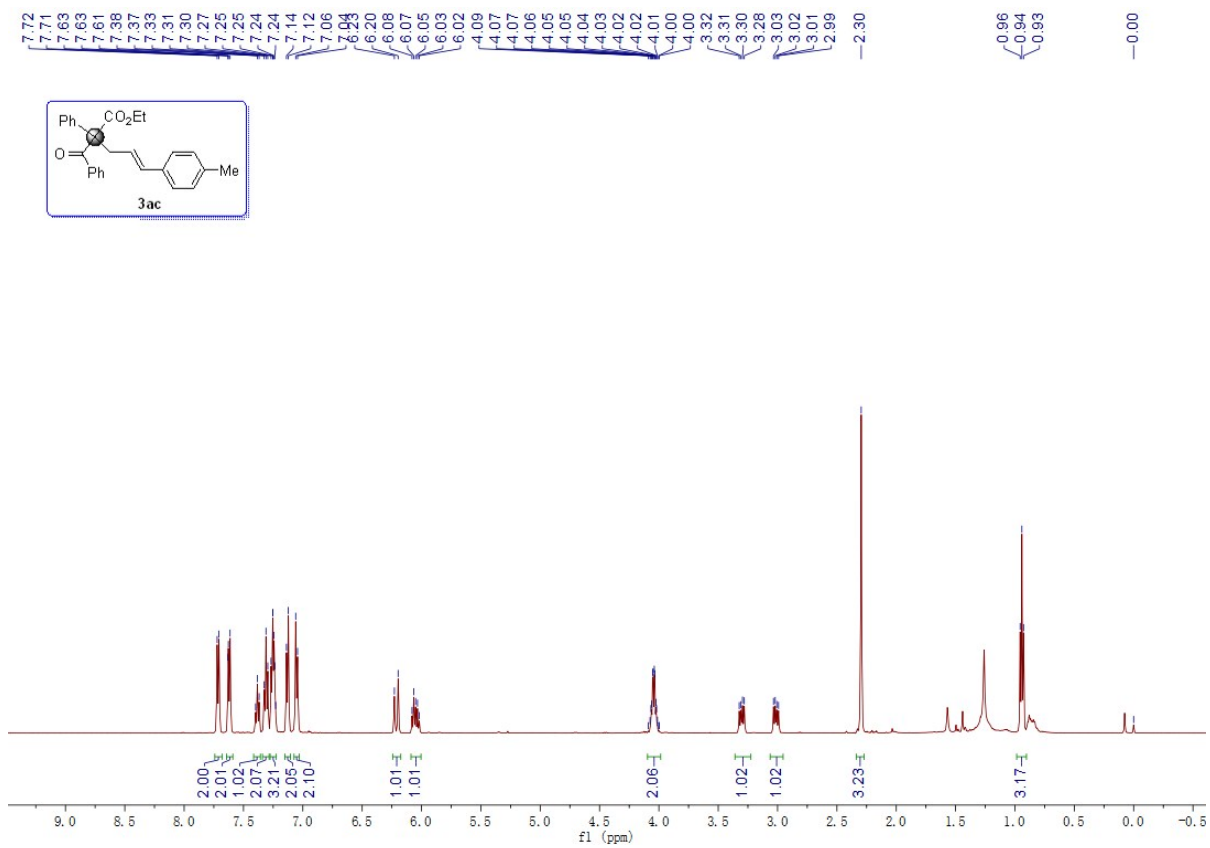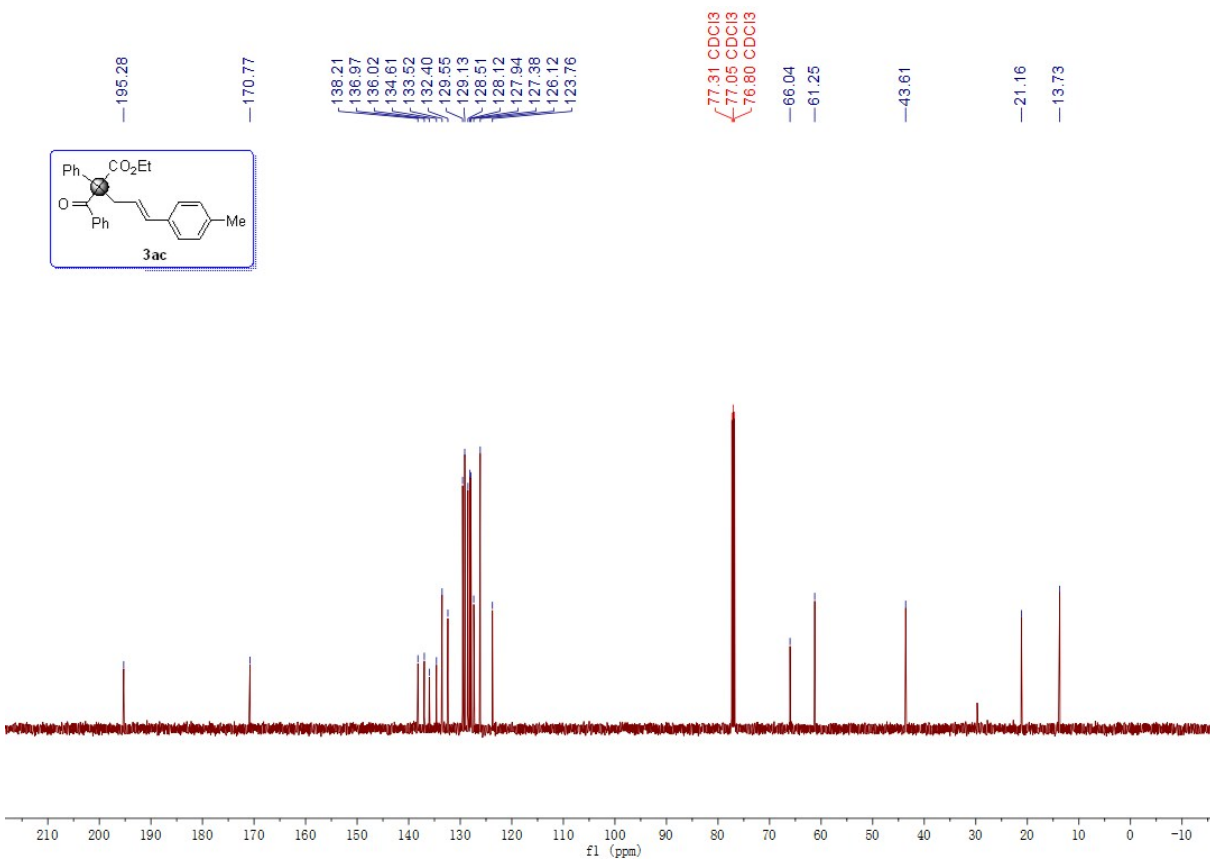

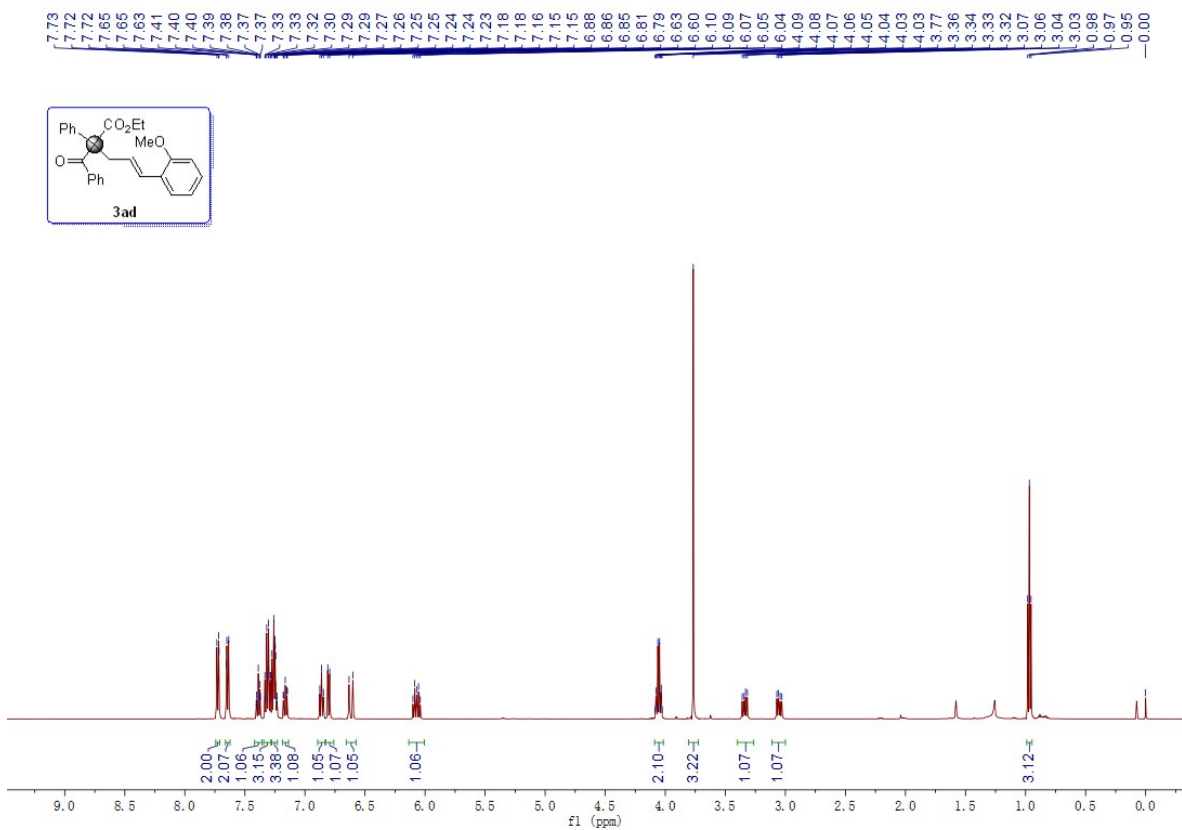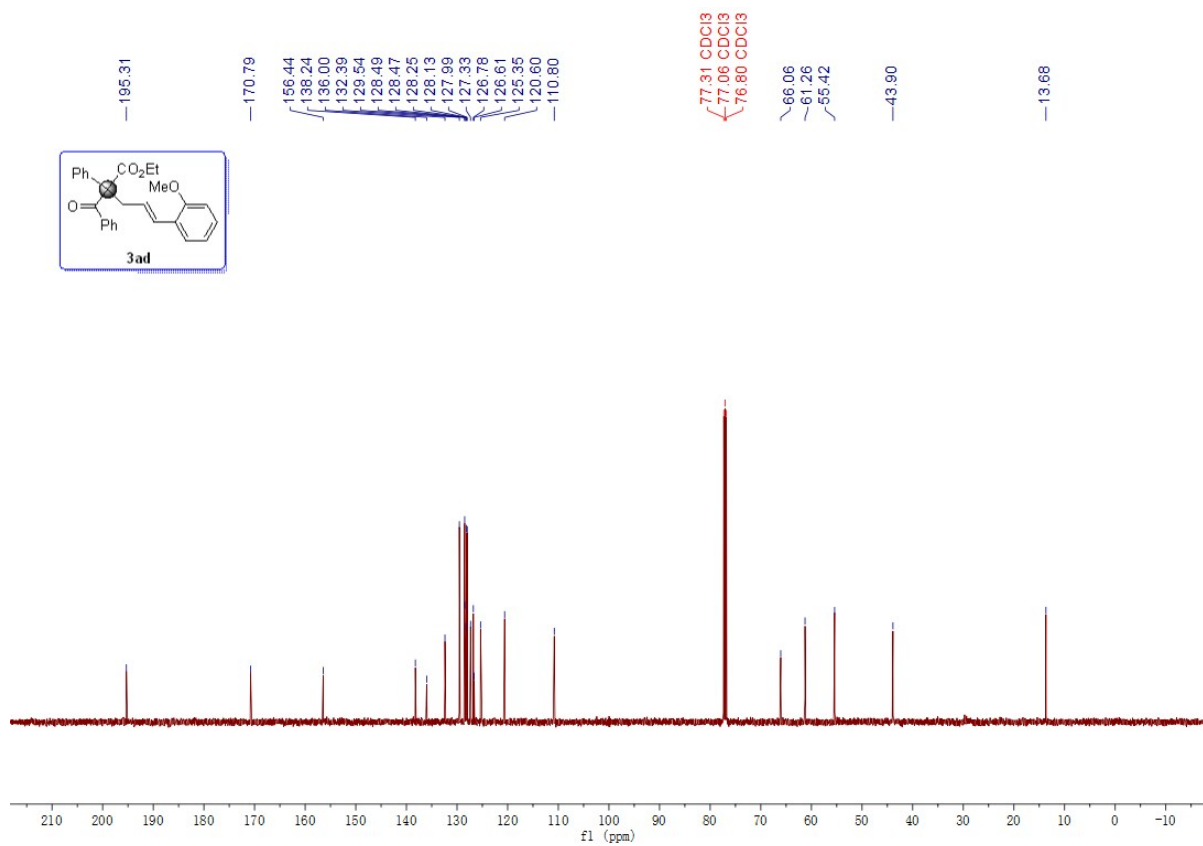

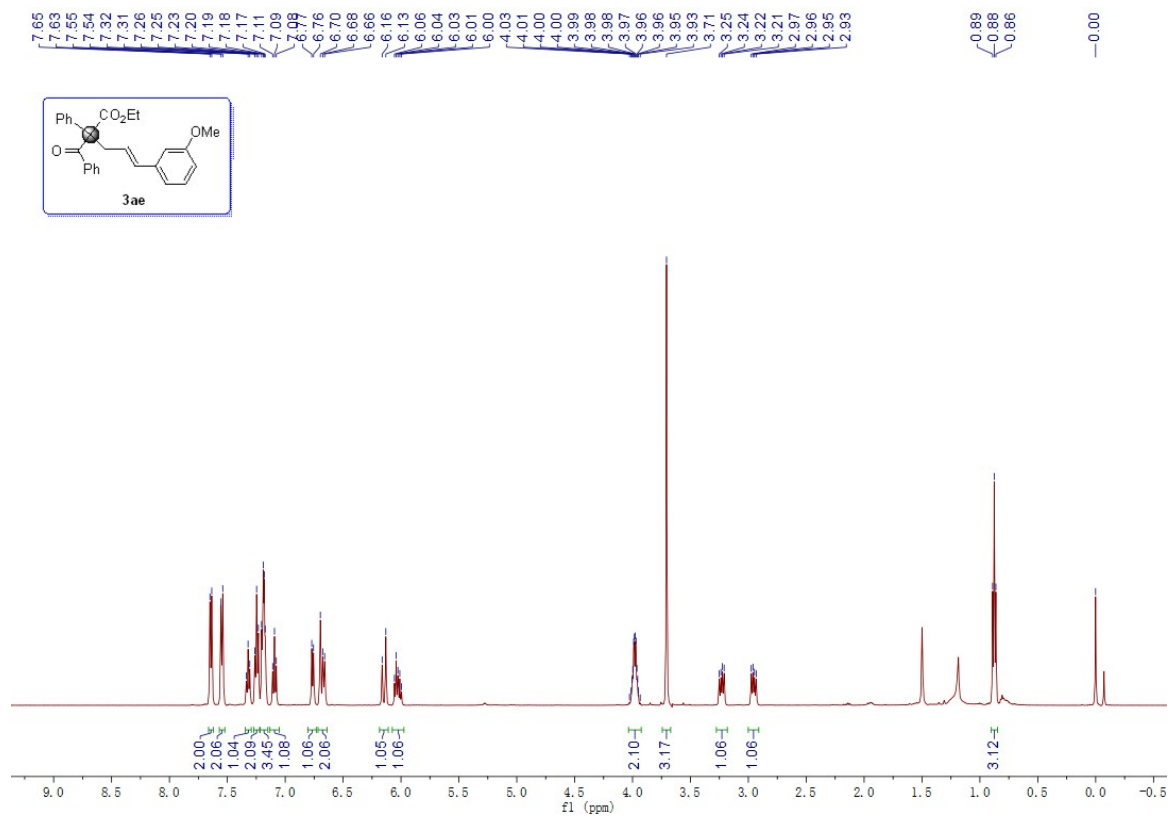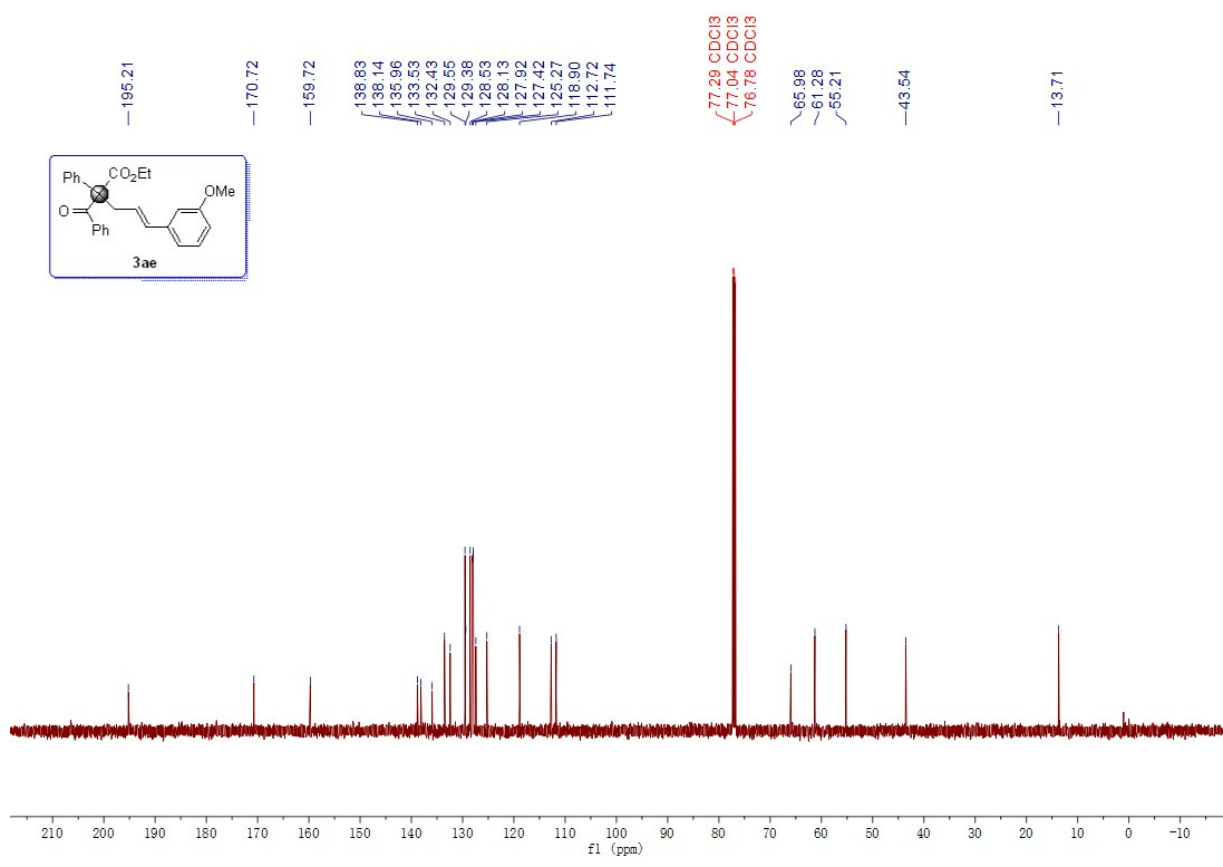

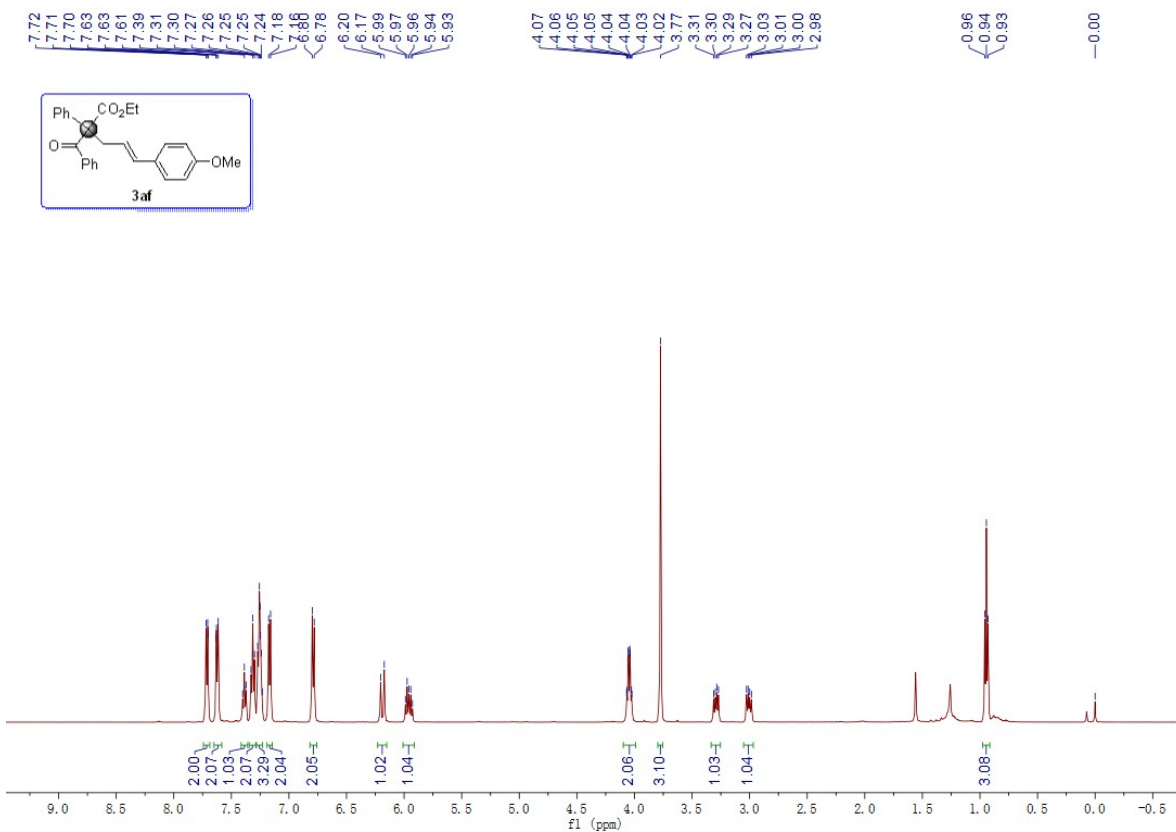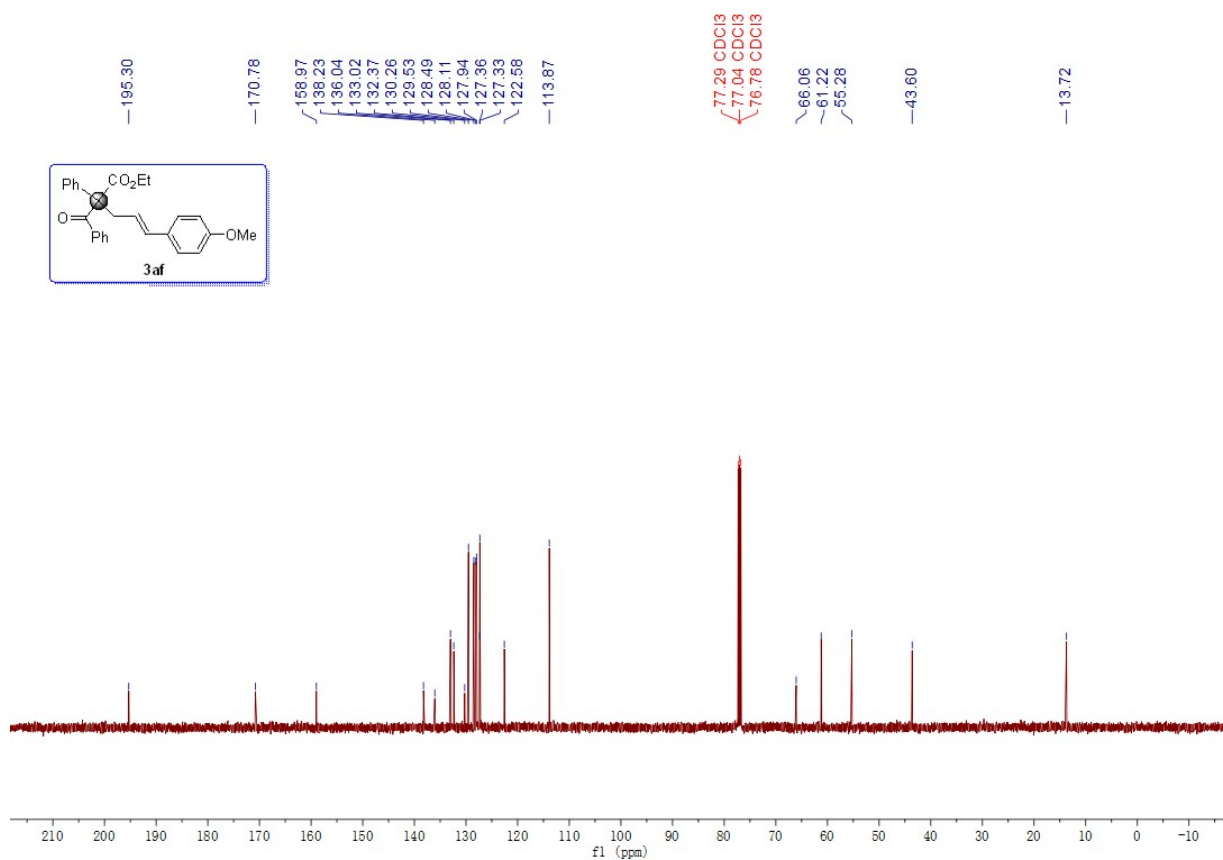

7.65  
7.64  
7.64  
7.57  
7.56  
7.55  
7.34  
7.33  
7.32  
7.31  
7.31  
7.30  
7.27  
7.26  
7.25  
7.25  
7.24  
7.24  
7.24  
7.23  
7.23  
7.23  
7.20  
7.20  
7.20  
7.19  
7.18  
7.18  
7.17  
7.17  
7.08  
7.07  
7.07  
7.06  
7.06  
7.05  
7.05  
7.05  
6.97  
6.96  
6.95  
6.94  
6.94  
6.91  
6.90  
6.89  
6.88  
6.87  
6.87  
6.87  
6.87  
6.34  
6.34  
6.13  
6.11  
6.10  
6.08  
4.01  
4.00  
3.98  
3.97  
3.28  
3.26  
3.25  
3.25  
3.01  
3.00  
2.99  
2.99  
2.97  
2.97  
0.89  
0.88  
0.00

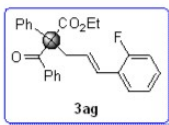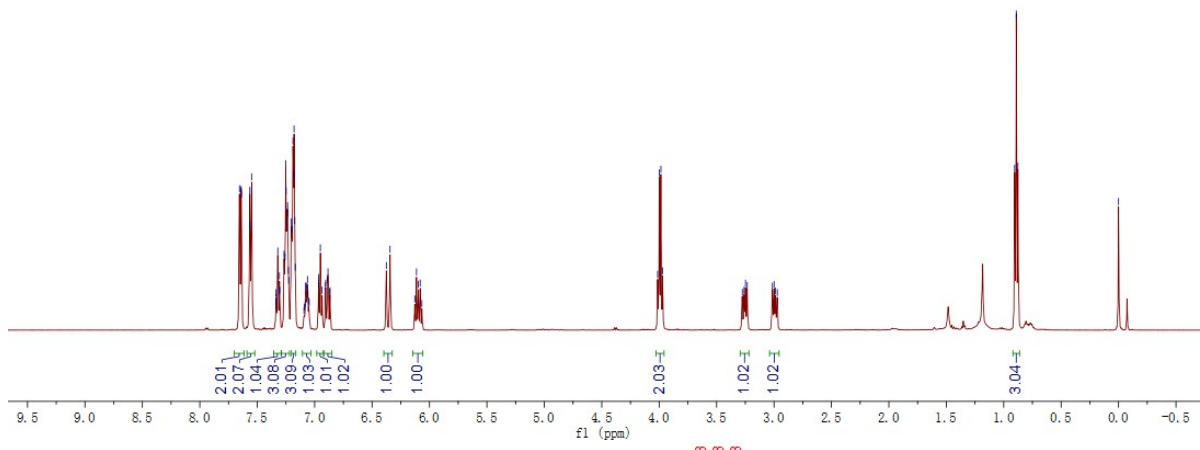

195.15  
170.69  
160.94  
158.96  
138.07  
135.91  
132.47  
129.56  
128.57  
128.45  
128.15  
127.92  
127.61  
127.58  
127.47  
127.27  
127.24  
125.94  
125.91  
125.16  
125.05  
123.99  
123.87  
115.63  
115.46  
77.32 CDCl3  
77.06 CDCl3  
76.81 CDCl3  
65.94  
61.35  
43.87  
13.68

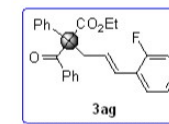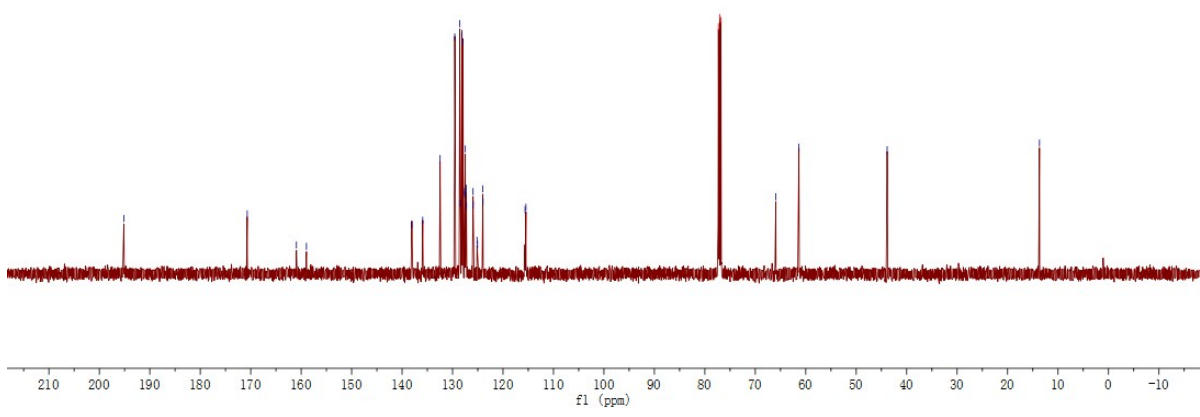



7.74  
7.72  
7.65  
7.64  
7.41  
7.40  
7.39  
7.38  
7.38  
7.37  
7.37  
7.34  
7.34  
7.33  
7.31  
7.28  
7.28  
7.28  
7.27  
7.26  
7.26  
7.25  
7.25  
7.24  
7.16  
7.16  
7.15  
7.15  
7.15  
7.13  
7.12  
7.12  
7.11  
7.11  
7.09  
7.09  
6.67  
6.64  
6.12  
6.11  
6.09  
6.08  
6.06  
6.06  
4.11  
4.10  
4.10  
4.09  
4.08  
4.07  
4.07  
4.06  
4.05  
4.05  
4.03  
4.03  
3.37  
3.35  
3.34  
3.33  
3.12  
3.11  
3.09  
3.08  
3.08  
0.96  
0.95  
0.00

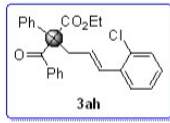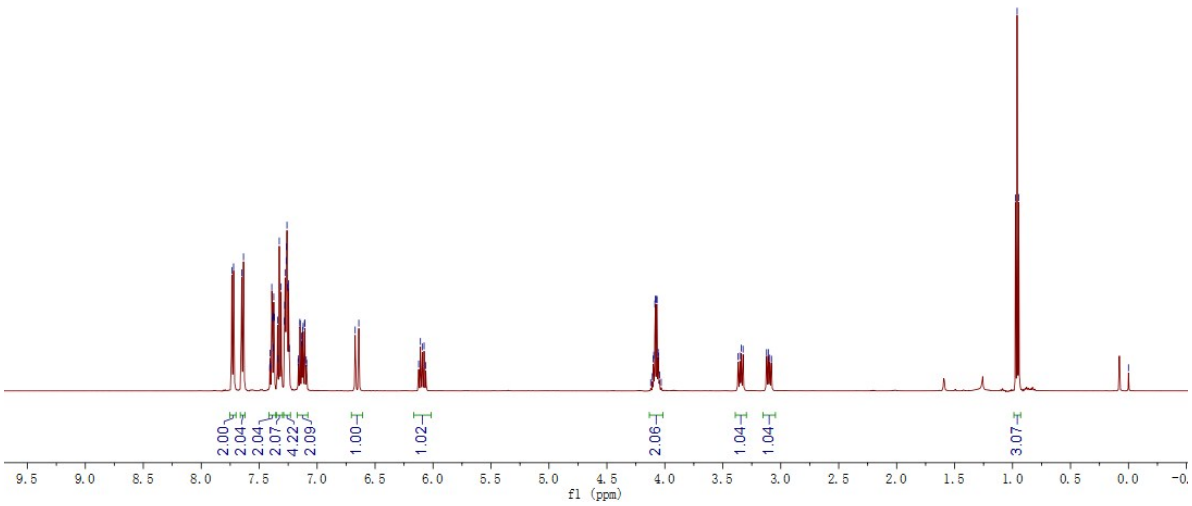

195.13  
170.67  
135.03  
135.85  
135.46  
132.67  
132.51  
129.93  
129.56  
129.50  
128.62  
128.30  
128.18  
127.94  
127.91  
127.50  
127.00  
126.77  
77.33 CDCl3  
77.08 CDCl3  
76.82 CDCl3  
65.92  
61.41  
43.64  
13.71

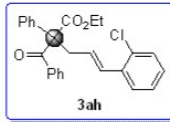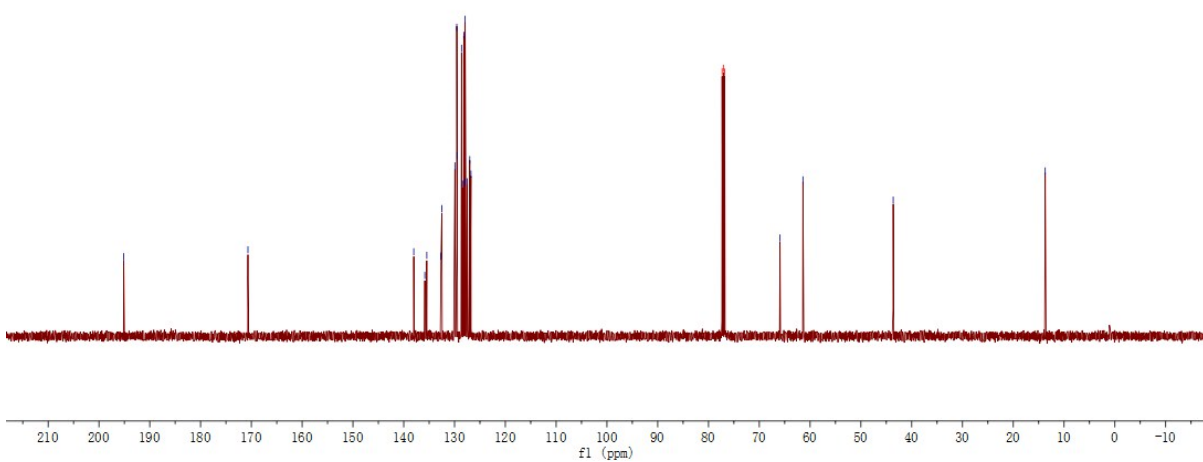

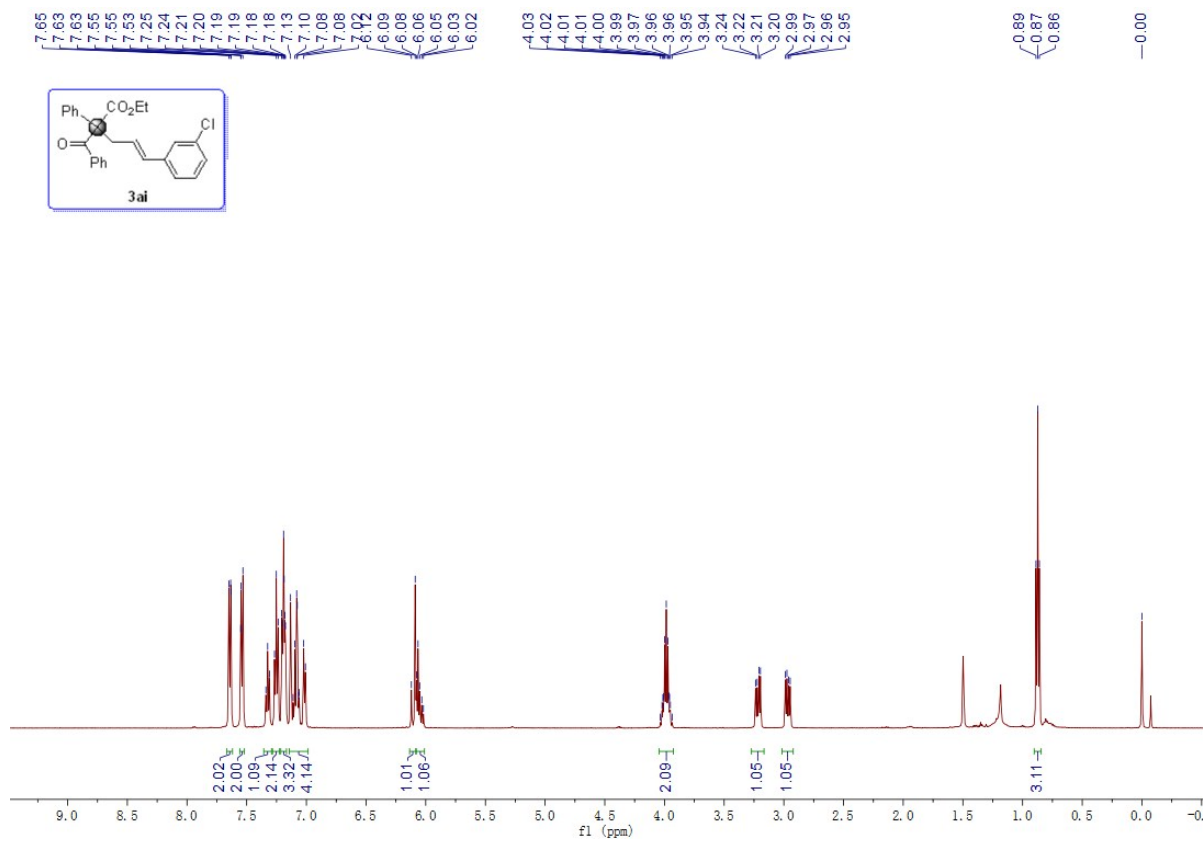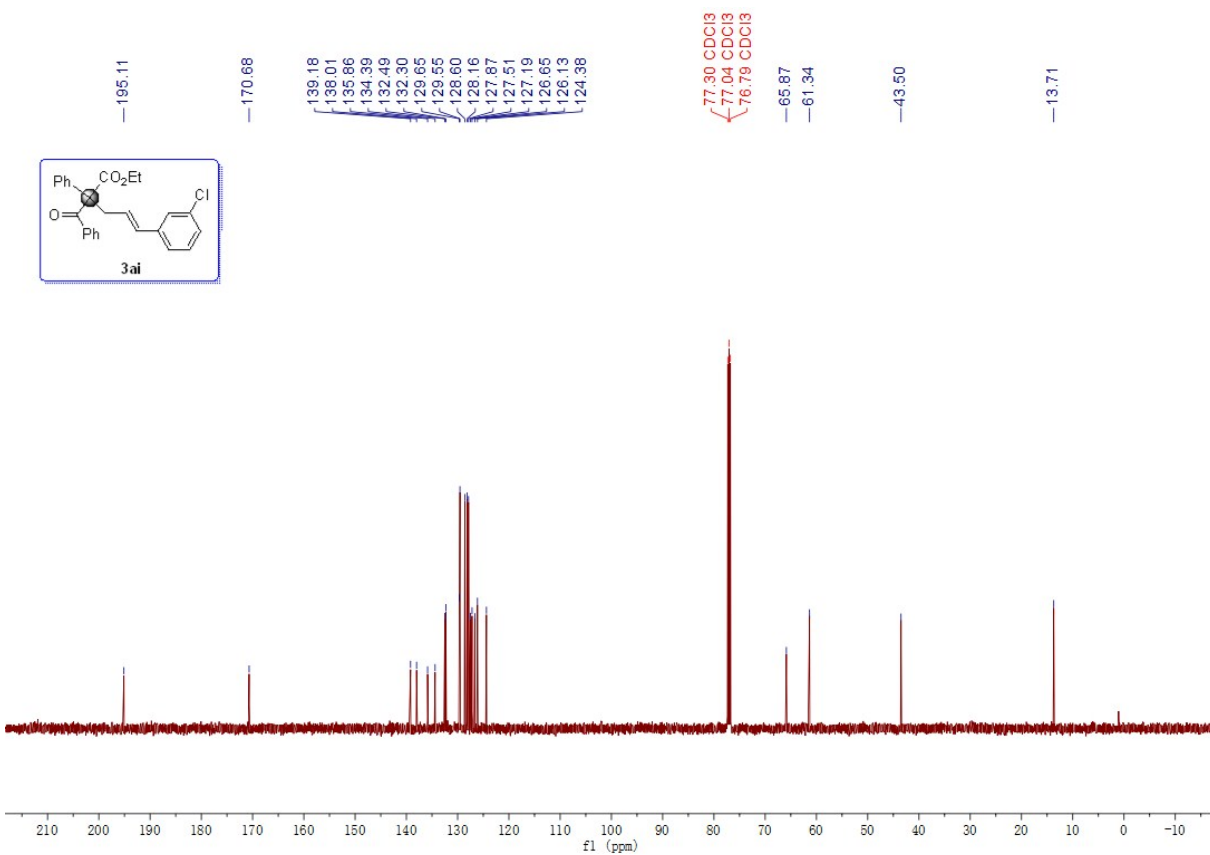

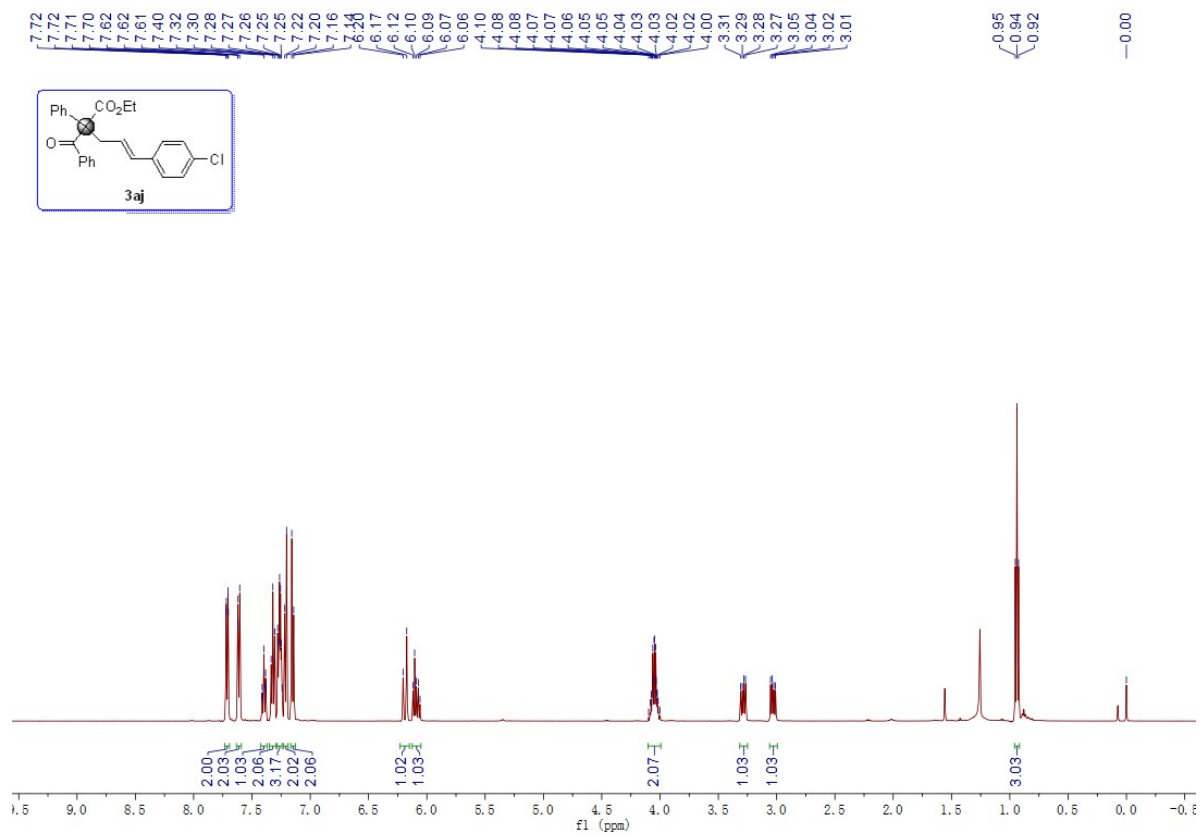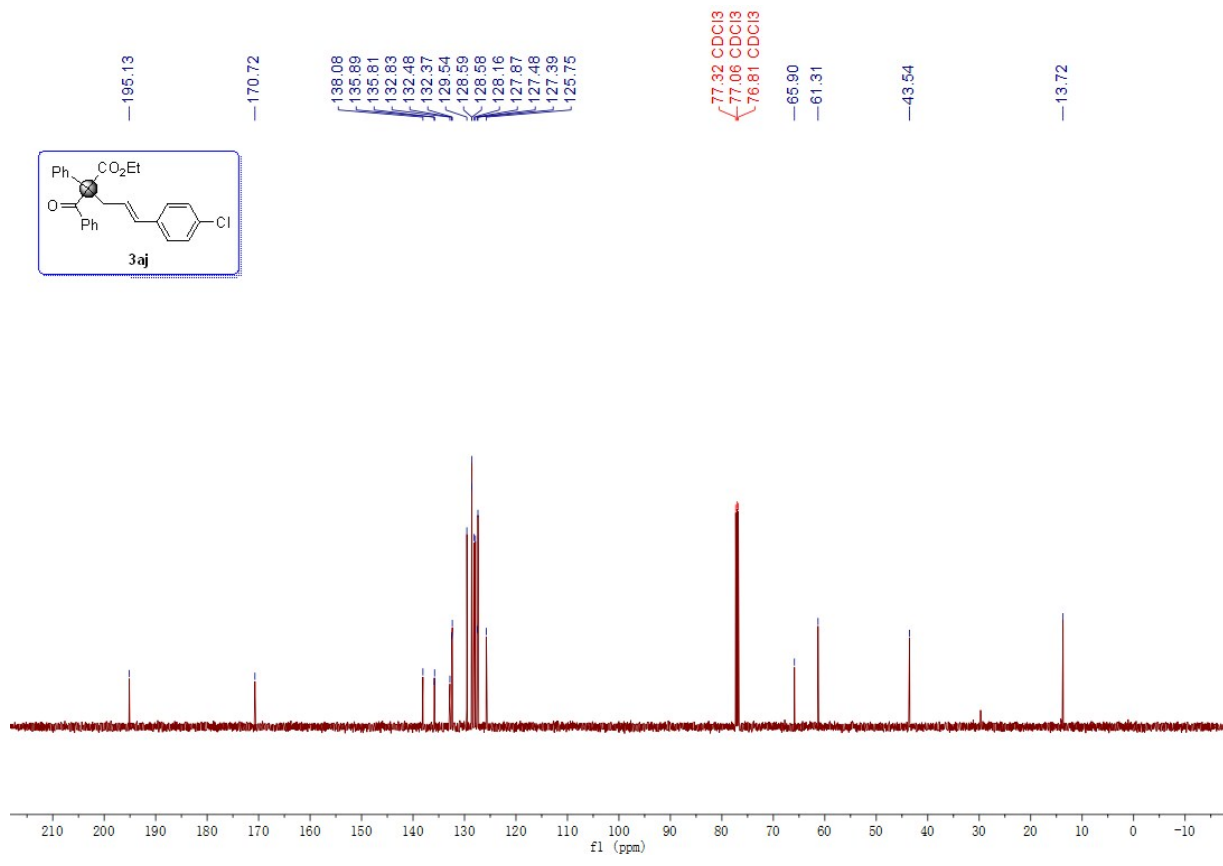

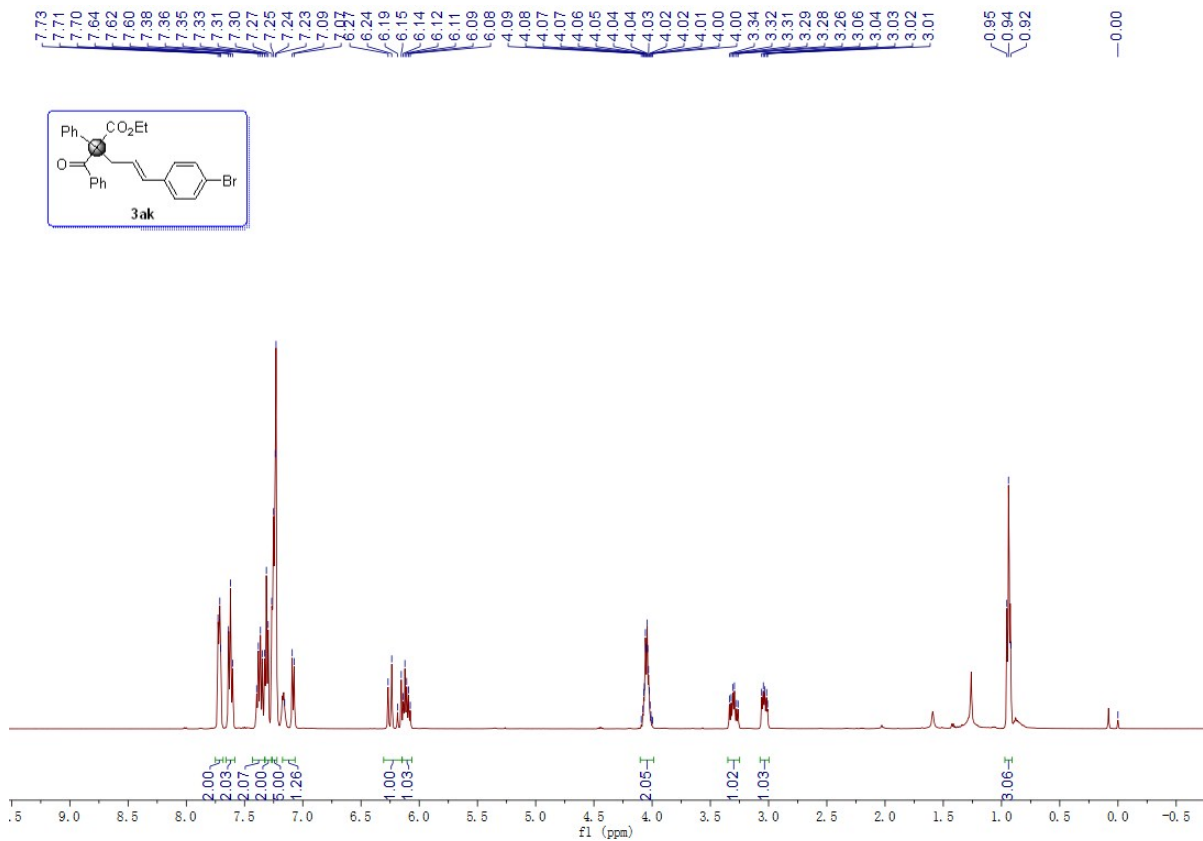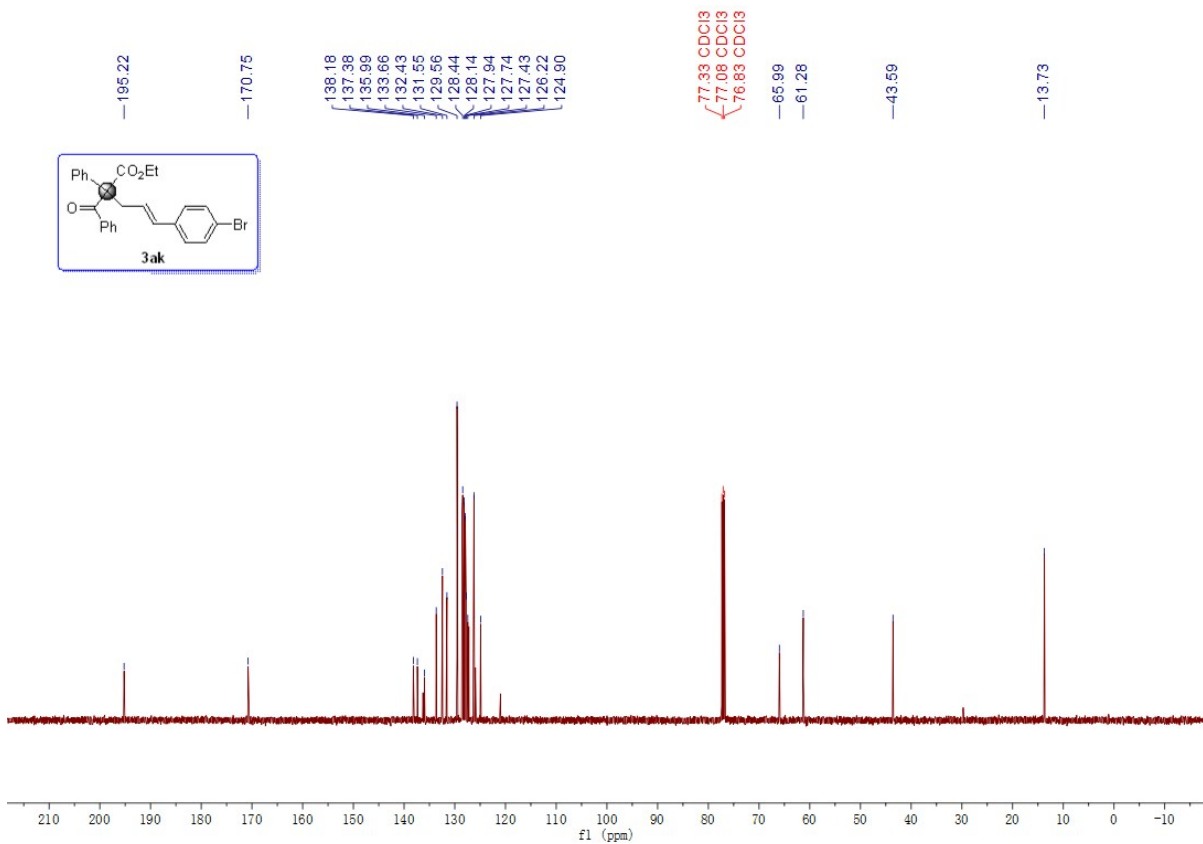

7.82  
7.81  
7.80  
7.79  
7.76  
7.74  
7.74  
7.72  
7.71  
7.67  
7.66  
7.45  
7.44  
7.43  
7.43  
7.42  
7.41  
7.40  
7.39  
7.39  
7.37  
7.35  
7.34  
7.32  
7.29  
7.29  
7.28  
7.27  
7.26  
7.26  
6.94  
6.91  
6.16  
6.14  
6.13  
6.11  
6.10  
4.13  
4.13  
4.12  
4.11  
4.10  
4.09  
4.08  
4.07  
4.07  
4.06  
4.05  
4.04  
4.04  
3.44  
3.42  
3.41  
3.39  
3.21  
3.20  
3.19  
3.17  
3.17  
0.94  
0.88

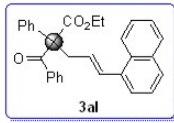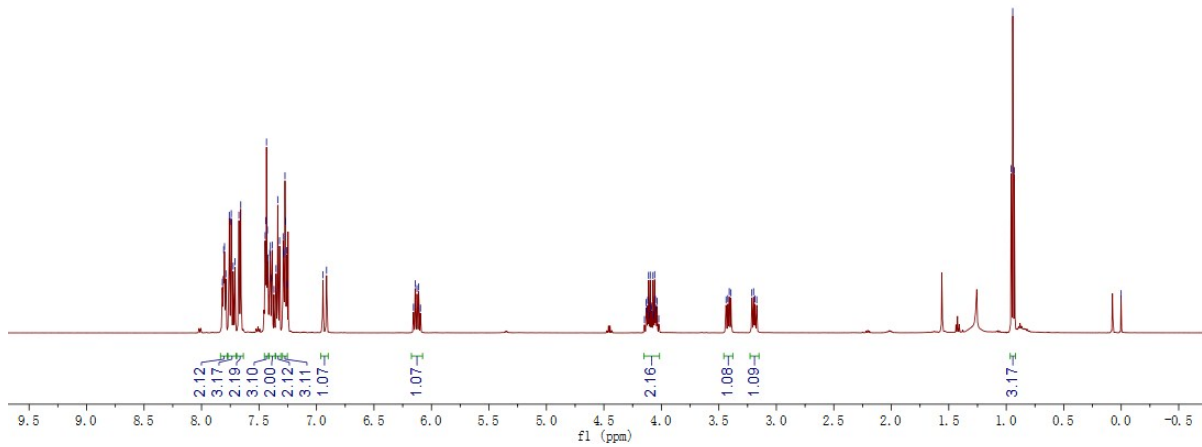

195.25  
170.85  
138.17  
135.94  
135.24  
133.48  
132.48  
131.36  
131.05  
129.60  
128.60  
128.37  
128.18  
128.10  
128.04  
127.61  
127.44  
125.79  
125.66  
125.63  
123.99  
123.98  
77.31 CDCl3  
77.06 CDCl3  
76.80 CDCl3  
66.04  
61.38  
43.90  
13.70

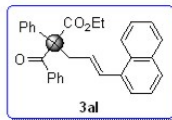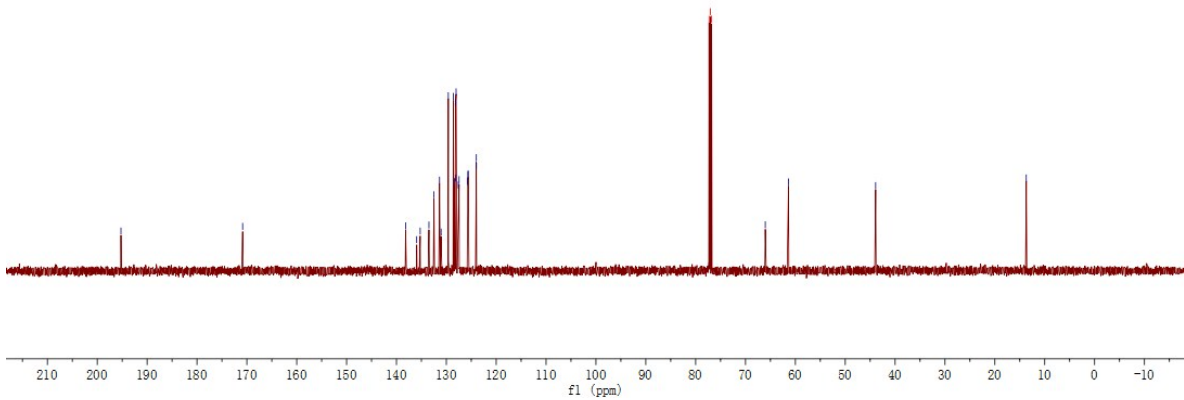

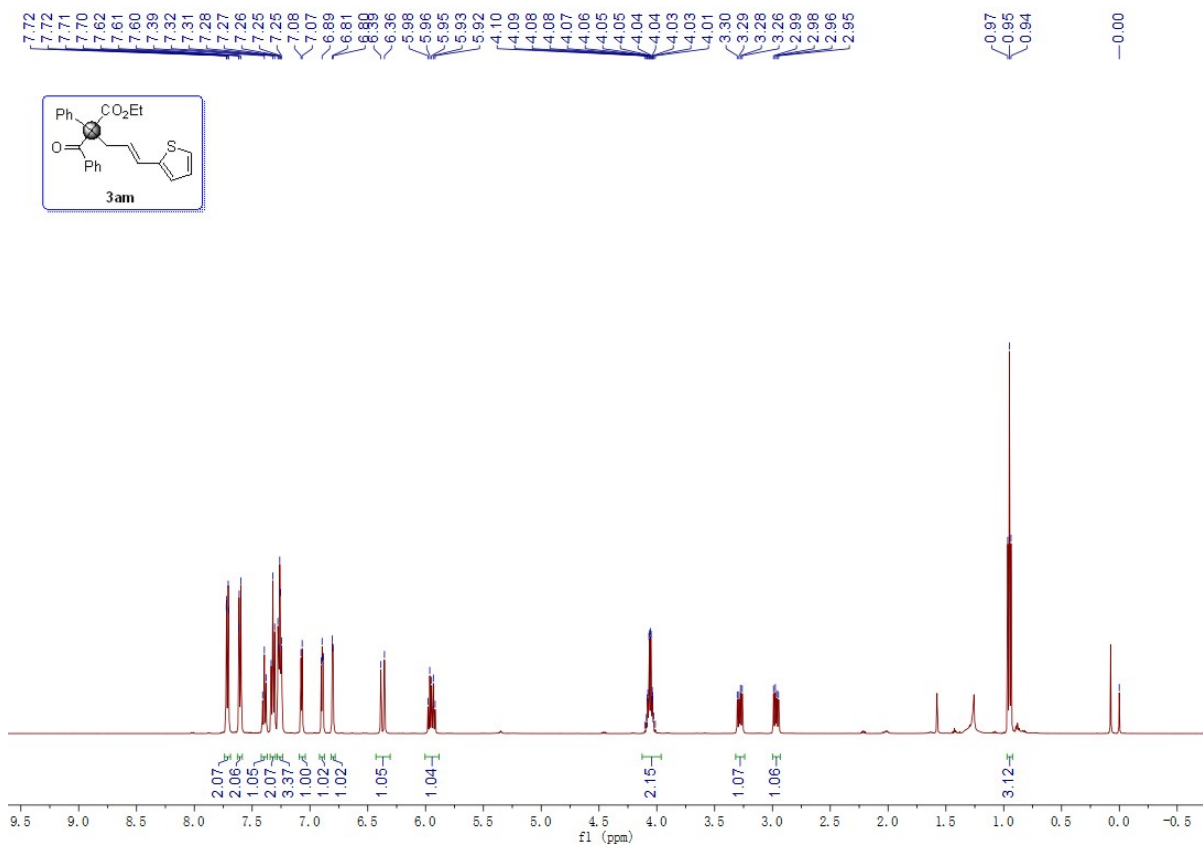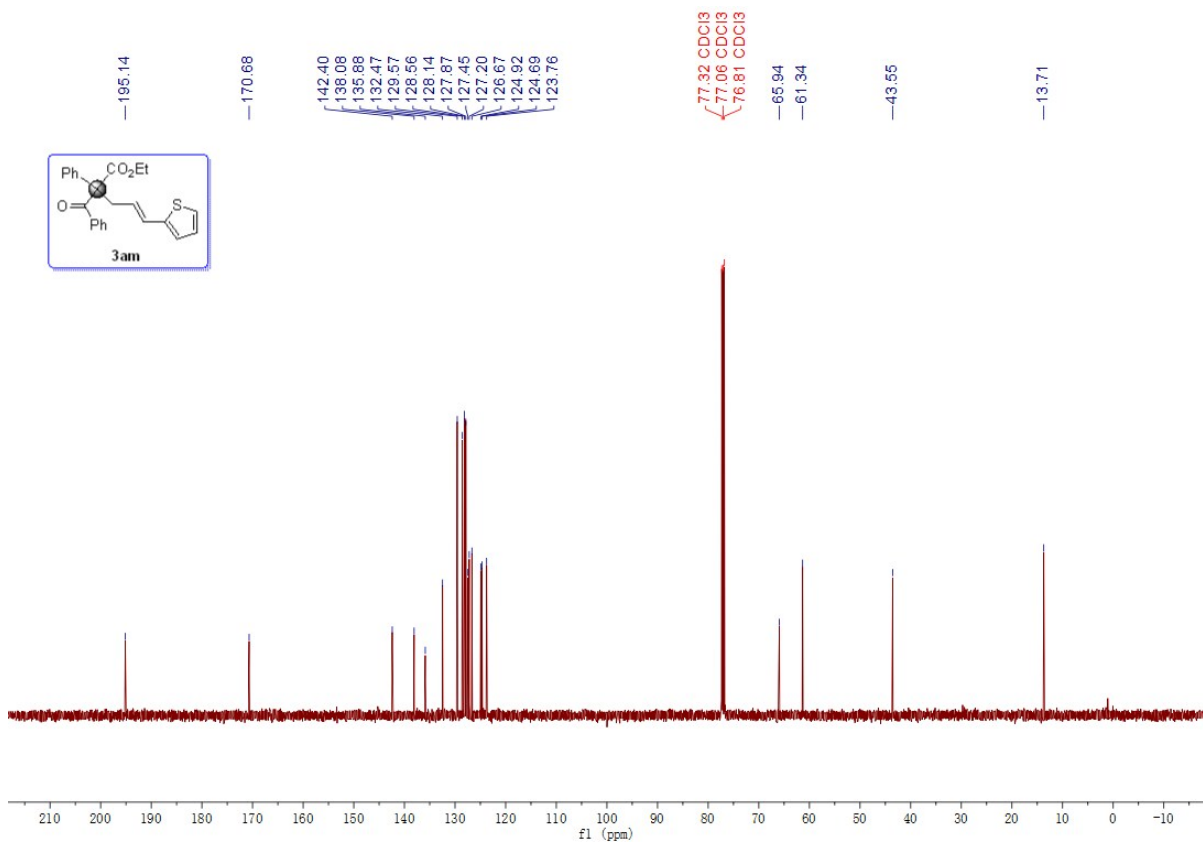

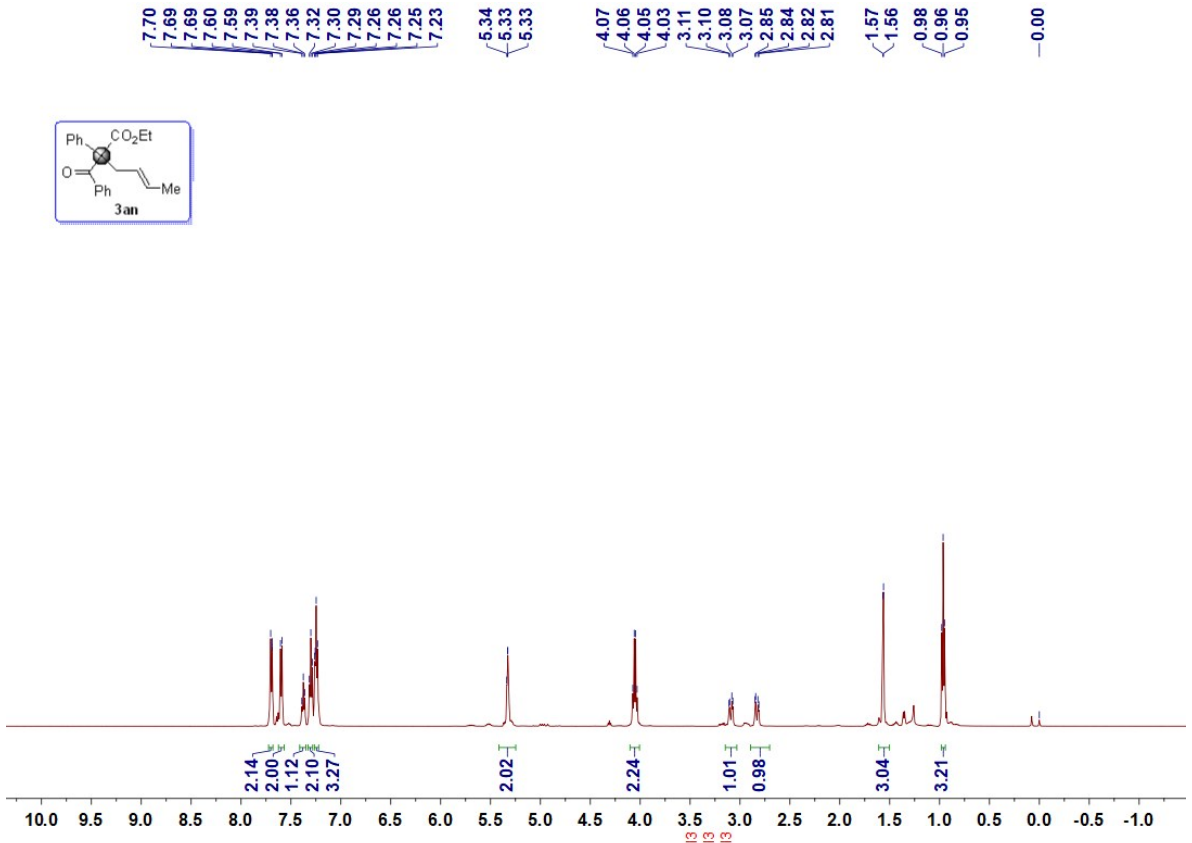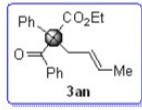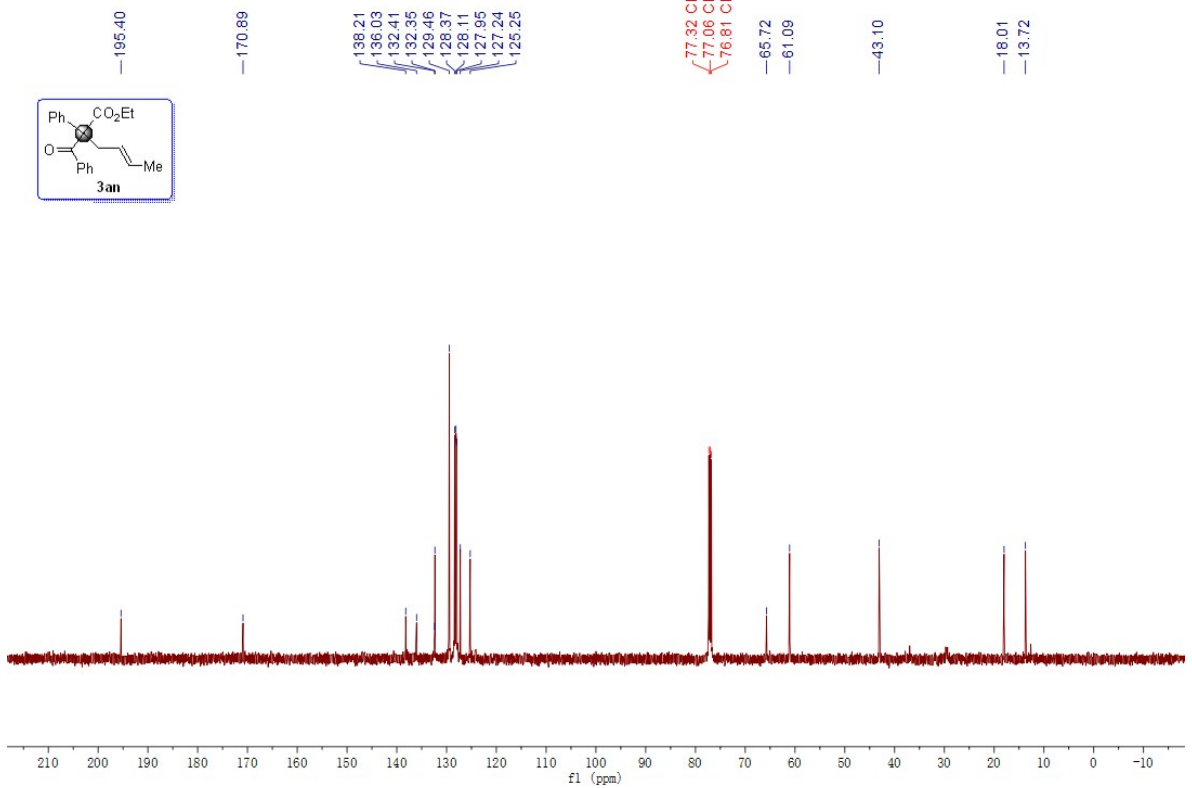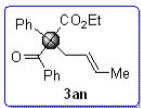

Supplement: c9cc08559a1.pdf [file c9cc08559a1.pdf]
